# Supplementary material for: Analysis of the genetic diversity and population structure of Salix psammophila based on phenotypic traits and simple sequence repeat markers
Source: PeerJ. 2019 Feb 18;7:e6419. doi: 10.7717/peerj.6419 (PMC6383557; doi:10.7717/peerj.6419)
Supplement: Supplemental Information 7 [file peerj-07-6419-s007.xlsx]

## Sheet: Sheet1
	c-4	c-16	c-24	c-25	c-46	c-49	c-52	c-57	c-59	c-61	c-69	c-73	c-74	c-76	c-77	c90	c96	c97	c99	c-100	c-112	c-115
pop 1
1,	242:246:252:254	217:217:217:220	259:259:259:273	188:188:190:190	212:215:218:218	187:187:190:190	234:234:238:238	205:208:208:208	244:254:256:260	238:238:240:240	245:245:247:263	332:334:334:338	284:284:286:286	249:251:257:263	186:186:188:192	292:292:292:292	208:208:210:210	276:288:288:294	248:248:266:269	293:296:296:296	347:353:353:356	209:209:209:209
2,	246:246:246:254	217:217:217:217	257:259:259:263	188:188:190:190	215:215:215:215	187:187:187:187	228:238:238:238	208:208:208:208	miss:miss:miss:miss	242:242:242:244	243:253:257:259	332:334:336:342	284:286:286:290	249:249:249:251	186:186:188:188	296:296:296:296	208:208:208:210	288:288:288:288	263:263:263:278	290:293:296:296	317:356:356:356	206:212:212:212
3,	246:246:252:262	211:211:220:220	259:259:271:277	188:188:190:190	212:215:215:215	187:187:187:187	224:224:226:226	208:208:208:208	244:246:254:256	240:242:244:248	247:247:247:263	338:338:342:342	284:286:286:288	249:249:249:251	186:186:186:186	294:294:296:296	208:208:208:212	288:288:288:290	266:266:266:272	290:290:290:296	353:353:353:353	209:209:209:212
4,	246:246:246:246	211:217:217:217	259:265:269:269	188:188:190:190	215:215:215:215	187:187:187:199	234:234:234:234	208:208:208:208	256:258:258:270	240:240:242:244	243:243:253:263	332:334:334:336	284:286:290:292	249:251:251:251	184:184:186:190	290:290:292:292	208:210:212:214	288:288:288:288	260:263:263:266	290:290:293:296	353:353:353:356	206:206:209:212
5,	246:250:254:254	211:211:211:217	257:257:259:265	188:190:190:190	209:215:215:218	178:187:187:196	222:238:238:238	205:208:208:208	240:240:244:256	236:236:248:250	245:245:247:253	332:334:334:338	284:284:284:286	249:251:251:253	186:186:186:186	296:296:296:296	208:208:210:218	290:294:296:298	266:266:278:278	296:296:296:296	353:356:356:356	209:212:212:212
6,	244:246:246:246	217:217:217:217	259:265:271:271	188:188:188:190	209:215:218:218	187:187:187:187	226:238:238:238	208:208:208:208	244:244:254:256	242:246:246:248	247:253:263:263	332:332:334:334	284:284:286:288	249:249:251:251	186:188:188:194	292:292:296:298	208:208:210:212	290:290:294:294	miss:miss:miss:miss	290:290:296:296	344:350:356:356	206:206:209:209
7,	242:242:246:262	211:217:220:226	257:259:259:265	188:188:188:190	215:215:218:218	187:187:187:190	216:216:232:232	205:208:208:208	240:244:246:256	240:240:242:244	239:239:245:253	332:334:336:338	284:286:286:286	249:249:251:251	186:186:186:190	292:292:298:298	208:210:210:210	288:288:288:288	263:263:266:278	290:290:293:296	347:353:356:356	206:212:212:212
8,	244:246:246:246	217:217:217:217	259:265:271:271	188:188:188:190	209:215:218:218	187:187:187:187	238:238:238:238	208:208:208:208	244:244:254:256	242:244:246:248	247:253:261:263	332:332:334:334	284:284:286:288	247:249:249:251	186:188:188:194	292:292:296:298	208:208:210:212	miss:miss:miss:miss	260:260:266:266	290:290:296:296	344:350:356:356	206:206:209:209
9,	246:246:246:254	217:217:217:217	257:259:259:263	188:188:190:190	215:215:215:215	187:187:187:187	238:238:238:238	208:208:208:208	240:254:258:260	242:242:242:244	243:253:253:257	332:334:334:336	284:286:286:290	249:251:251:251	186:186:188:188	296:296:296:296	208:208:208:210	288:288:288:288	263:263:263:278	290:293:296:296	317:356:356:356	206:212:212:212
10,	242:246:246:262	211:217:220:226	257:259:259:265	188:188:188:190	miss:miss:miss:miss	187:187:187:190	216:216:230:230	205:208:208:208	240:244:246:256	240:240:242:244	237:237:245:253	332:334:336:338	284:286:286:286	miss:miss:miss:miss	186:186:186:190	292:292:298:298	208:210:210:210	288:288:288:288	263:263:266:278	290:290:293:296	347:353:356:356	206:212:212:212
11,	246:246:252:252	211:217:217:217	259:259:259:271	188:188:190:190	209:215:218:221	187:187:187:187	238:238:246:246	205:208:208:208	240:244:244:256	234:236:236:246	243:243:263:263	334:334:334:334	284:284:286:288	249:251:251:251	184:186:188:188	292:292:292:292	208:208:208:212	288:288:290:290	260:263:263:272	290:290:293:296	353:356:356:356	206:212:212:218
12,	242:246:250:252	217:217:217:220	257:259:269:269	188:188:190:190	215:215:218:218	187:190:190:190	miss:miss:miss:miss	205:208:208:208	240:240:260:266	232:240:256:258	239:239:245:257	332:332:334:334	284:286:288:290	245:249:249:249	184:186:186:188	294:294:296:296	208:208:210:212	288:288:304:304	260:260:266:272	290:290:296:299	317:353:353:356	209:212:212:212
13,	246:246:250:254	211:211:211:217	257:257:259:265	188:190:190:190	209:215:215:218	178:187:187:196	220:228:238:238	205:208:208:208	240:240:244:256	234:236:248:250	245:247:259:259	332:334:334:338	284:284:286:286	249:251:251:253	186:186:186:186	296:296:296:296	208:208:210:218	290:294:294:296	266:266:278:278	296:296:296:296	353:356:356:356	209:212:212:212
14,	244:246:246:246	217:217:217:217	miss:miss:miss:miss	188:188:188:190	209:215:218:218	187:187:187:187	238:238:238:238	208:208:208:208	244:244:254:256	242:244:246:248	miss:miss:miss:miss	332:332:334:334	284:284:286:288	249:249:251:251	186:188:188:194	292:292:296:298	208:208:210:212	284:290:294:294	260:260:266:266	290:290:296:296	miss:miss:miss:miss	206:206:209:209
15,	242:246:252:254	217:217:217:220	259:259:259:273	188:188:190:190	212:215:218:218	187:187:187:190	234:234:238:238	205:208:208:208	244:254:256:260	238:238:240:240	245:245:247:263	332:334:334:338	284:284:286:286	249:251:257:261	186:186:188:192	292:292:292:292	208:208:210:210	276:288:288:294	248:248:266:269	293:296:296:296	347:353:353:356	209:209:209:209
16,	246:246:252:252	211:217:217:220	259:259:259:271	188:188:188:190	209:215:218:221	187:187:187:199	226:226:230:230	205:208:208:208	240:244:244:256	234:236:236:246	243:243:263:265	334:334:334:334	284:284:286:286	249:251:251:251	184:186:188:188	292:292:292:292	208:208:208:212	290:290:294:294	260:263:263:272	290:290:293:296	353:356:356:356	209:209:209:209
17,	246:246:246:254	217:217:217:217	257:259:259:263	188:188:190:190	215:215:215:215	187:187:187:187	226:238:238:238	208:208:208:208	240:254:258:260	242:242:242:244	243:253:253:257	332:334:334:336	284:286:286:290	249:251:251:251	186:186:188:188	296:296:296:296	208:208:208:210	288:288:288:288	263:263:263:278	290:293:296:296	317:356:356:356	206:212:212:212
18,	246:246:252:252	211:217:217:217	259:259:259:271	188:188:190:190	209:215:218:221	187:187:187:187	238:238:246:246	205:208:208:208	240:244:244:256	234:236:236:246	243:243:263:265	334:334:334:334	284:284:286:288	249:251:251:251	184:186:188:188	292:292:292:292	208:208:208:212	288:288:290:290	260:263:263:272	290:290:293:296	353:356:356:356	miss:miss:miss:miss
19,	244:246:246:246	217:217:217:217	259:265:271:271	188:188:188:190	209:215:218:218	187:187:187:187	226:238:238:238	208:208:208:208	244:244:254:256	242:244:246:248	247:253:263:263	332:332:334:334	284:284:286:288	249:249:251:251	186:188:188:194	292:292:296:298	208:208:210:212	290:290:294:294	260:260:266:266	290:290:296:296	344:350:356:356	206:206:209:209
20,	242:246:252:254	217:217:217:220	259:259:259:273	188:188:190:190	212:215:218:218	187:187:187:190	234:234:238:238	205:208:208:208	244:254:256:260	238:238:240:240	245:245:247:263	332:334:334:338	284:284:286:286	249:251:257:261	186:186:188:192	292:292:292:292	208:208:210:210	276:288:288:294	266:266:269:269	293:296:296:296	347:353:353:356	209:209:209:209
21,	242:246:252:254	217:217:217:220	259:259:259:273	188:188:190:190	212:215:218:218	187:187:187:190	234:234:238:238	205:208:208:208	244:254:256:260	238:240:240:240	245:245:261:263	332:334:336:338	284:284:286:286	249:251:257:263	186:186:188:192	292:292:292:292	208:208:210:210	276:288:288:294	248:248:266:269	293:296:296:296	347:353:353:356	209:209:209:209
22,	246:246:252:252	211:217:217:217	259:259:259:271	188:188:190:190	209:215:218:221	187:187:187:187	238:238:246:246	205:208:208:208	240:244:244:256	234:236:236:246	243:243:263:263	332:332:332:332	284:284:286:288	251:251:251:251	184:186:188:188	292:292:292:292	208:208:208:212	288:290:290:290	260:263:272:272	290:290:293:296	353:356:356:356	206:209:212:218
23,	244:246:246:246	217:217:217:217	259:265:271:271	188:188:188:190	209:215:218:218	187:187:187:187	226:238:238:238	208:208:208:208	244:244:254:256	242:244:246:246	247:253:263:263	332:332:334:334	284:284:286:288	249:249:251:251	186:188:188:194	292:292:296:298	208:208:210:212	290:290:294:294	260:260:266:266	290:290:296:296	344:350:356:356	206:206:209:209
24,	244:246:246:246	217:217:217:217	259:265:271:271	188:188:188:190	209:215:218:218	187:187:187:187	226:238:238:238	208:208:208:208	miss:miss:miss:miss	242:244:246:248	247:253:261:263	332:332:334:334	284:284:286:288	249:249:251:251	186:188:188:194	292:292:296:298	208:208:208:212	290:290:294:294	260:260:266:266	290:290:296:296	344:350:356:356	206:206:209:209
25,	242:246:246:262	211:217:220:226	257:259:259:265	188:188:188:190	215:215:218:218	187:187:187:190	216:216:230:238	205:208:208:208	240:244:246:256	240:242:244:246	237:245:253:263	332:334:336:338	284:286:286:286	249:249:251:251	186:186:186:190	292:292:298:298	208:210:210:210	288:288:288:288	263:263:266:278	290:290:293:296	347:353:356:356	206:212:212:212
26,	miss:miss:miss:miss	211:217:220:226	miss:miss:miss:miss	miss:miss:miss:miss	215:215:218:218	187:187:187:190	216:216:230:230	205:208:208:208	240:244:246:256	240:240:242:244	239:245:251:253	332:334:336:338	284:286:286:286	249:249:251:251	186:186:186:190	292:292:298:298	208:210:210:210	288:288:288:288	263:266:266:278	290:290:293:296	347:353:356:356	206:212:212:212
27,	246:246:252:252	211:217:217:217	259:259:259:271	188:188:190:190	209:215:218:221	187:187:187:187	238:238:246:246	205:208:208:208	240:244:244:256	234:236:236:246	249:249:263:263	332:332:332:332	284:284:286:288	251:251:251:251	184:186:188:188	292:292:292:292	208:208:208:212	288:290:290:290	260:263:263:272	290:290:293:296	353:356:356:356	206:212:212:218
pop 2
28,	246:246:246:246	217:217:217:217	257:259:259:263	188:188:190:190	215:215:215:215	187:187:187:187	238:238:238:238	208:208:208:208	240:254:258:260	234:242:242:244	253:253:257:257	332:332:332:332	284:286:286:290	249:249:251:251	186:186:188:188	miss:miss:miss:miss	208:208:208:210	288:288:288:288	263:263:263:278	290:293:296:296	317:356:356:356	206:212:212:212
29,	246:246:246:246	217:217:217:217	257:259:259:263	188:188:190:190	215:215:215:215	187:187:187:187	238:238:238:238	208:208:208:208	240:254:258:260	234:242:242:244	253:253:257:257	332:332:332:332	284:286:286:290	249:249:251:251	186:186:188:188	miss:miss:miss:miss	208:208:208:208	288:288:288:288	263:263:263:278	290:293:296:296	317:356:356:356	206:212:212:212
30,	246:246:250:250	217:217:217:220	259:259:259:273	188:188:190:190	212:215:218:218	187:187:190:190	234:234:238:238	205:208:208:208	244:254:256:260	238:238:240:240	245:245:247:261	334:334:334:334	284:284:286:286	249:251:261:261	186:186:188:192	292:292:292:292	208:208:210:210	288:288:288:288	248:248:266:269	293:296:296:296	347:353:353:356	209:209:209:209
31,	246:246:246:250	211:217:217:220	259:259:259:259	188:188:190:190	209:212:215:218	187:187:190:199	226:230:234:238	205:208:208:208	miss:miss:miss:miss	234:236:238:240	miss:miss:miss:miss	332:332:332:332	284:284:286:286	245:249:251:261	186:186:186:188	miss:miss:miss:miss	208:208:210:210	288:288:288:288	miss:miss:miss:miss	290:293:296:296	347:353:356:356	209:209:209:209
32,	246:246:250:250	217:217:217:220	259:259:259:273	188:188:190:190	212:215:218:218	187:187:190:190	234:234:238:238	205:208:208:208	miss:miss:miss:miss	238:238:240:240	245:245:247:261	334:334:334:334	284:284:286:286	249:249:251:261	186:186:188:192	miss:miss:miss:miss	208:208:210:210	288:288:288:288	248:248:266:269	293:296:296:296	347:353:353:356	209:209:209:209
33,	246:246:250:250	217:217:217:220	259:259:259:273	188:188:190:190	212:215:218:218	187:187:190:190	234:234:238:238	208:208:208:208	miss:miss:miss:miss	238:238:240:240	245:245:247:261	334:334:334:334	284:284:286:286	249:249:251:261	186:186:188:192	292:292:292:292	208:208:210:210	288:288:288:288	248:248:266:269	293:296:296:296	347:353:353:356	209:209:209:209
34,	246:246:250:250	217:217:217:220	259:259:259:273	188:188:190:190	212:215:218:218	187:187:187:190	234:234:238:238	208:208:208:208	244:254:256:260	234:242:242:244	miss:miss:miss:miss	334:334:334:334	284:284:286:286	249:249:251:261	186:186:188:192	292:292:292:292	208:208:210:210	288:288:288:288	248:248:266:269	293:296:296:296	347:353:353:356	209:209:209:209
35,	246:246:246:246	217:217:217:217	259:265:271:271	188:188:188:190	209:215:218:218	187:187:187:187	238:238:238:238	208:208:208:208	244:244:254:256	234:242:242:244	247:253:261:261	334:334:334:334	284:284:286:288	249:249:251:251	186:188:188:194	292:292:296:298	208:208:208:212	290:290:294:294	260:260:266:266	290:290:296:296	344:350:356:356	206:206:209:209
36,	246:246:250:250	217:217:217:220	259:259:259:273	188:188:190:190	miss:miss:miss:miss	187:187:190:190	234:234:238:238	205:208:208:208	244:254:256:260	238:238:240:240	245:245:247:261	334:334:334:334	284:284:286:286	249:249:249:261	186:186:188:192	292:292:292:292	208:208:210:210	288:288:288:288	248:248:266:269	293:293:293:296	347:353:353:356	209:209:209:209
37,	246:246:246:246	217:217:217:217	257:259:259:263	188:188:190:190	215:215:215:215	187:187:187:187	238:238:238:238	208:208:208:208	240:254:258:260	238:238:240:240	243:253:253:257	332:332:332:332	284:286:286:290	249:249:251:251	186:186:186:188	296:296:296:296	208:208:208:210	288:288:288:288	263:263:263:278	290:293:296:296	317:356:356:356	206:212:212:212
38,	246:246:246:248	211:217:217:226	259:259:259:259	188:188:190:190	212:215:215:218	187:187:187:199	224:230:238:238	205:205:208:208	240:240:244:250	234:242:242:244	239:247:255:261	328:332:332:332	284:284:286:288	249:249:251:251	186:186:186:188	292:292:294:294	208:208:208:210	296:296:302:302	248:260:266:266	290:290:296:296	350:356:356:356	209:209:209:212
39,	246:246:246:248	211:217:217:226	259:259:259:259	188:188:190:190	212:215:215:218	187:187:187:199	224:230:238:238	205:205:208:208	240:240:244:250	234:242:242:244	239:247:255:261	328:332:332:332	284:284:286:288	249:249:251:251	186:188:188:188	292:292:294:294	208:208:208:210	296:296:302:302	248:260:266:266	290:290:296:296	350:356:356:356	209:209:209:212
40,	246:246:246:246	217:217:217:220	257:257:259:267	188:188:188:190	209:215:215:218	187:187:199:199	216:238:238:238	205:205:205:208	244:244:250:250	238:238:240:240	247:253:257:263	332:332:332:332	284:284:284:284	245:249:263:263	186:186:190:192	292:292:296:296	208:208:210:210	288:288:288:288	266:266:266:266	290:293:296:296	356:356:356:356	209:209:212:212
41,	246:246:250:250	217:217:217:220	257:259:269:269	188:188:190:190	215:215:218:218	miss:miss:miss:miss	216:216:228:234	205:208:208:208	240:240:260:264	232:232:240:256	239:239:245:255	332:332:332:332	284:286:288:290	245:249:249:249	184:186:186:188	294:294:296:296	208:208:208:210	288:288:302:302	260:260:266:272	290:290:296:299	317:353:353:356	209:212:212:212
42,	246:246:246:246	211:211:211:217	257:257:259:265	188:190:190:190	209:215:215:218	178:187:187:196	220:238:238:238	205:208:208:208	240:240:244:256	234:236:236:250	245:245:247:257	332:332:332:332	284:284:286:286	249:251:251:253	186:186:186:186	296:296:296:296	208:208:210:218	290:294:294:296	266:266:278:278	296:296:296:296	353:356:356:356	209:209:212:212
43,	miss:miss:miss:miss	211:217:220:226	257:259:259:265	188:188:188:190	215:215:218:218	187:187:190:190	216:216:216:230	205:208:208:208	240:244:244:256	240:240:244:244	237:237:245:253	332:332:336:338	284:284:286:286	249:249:251:251	186:186:186:190	292:292:298:298	208:210:210:210	288:288:288:288	263:263:266:278	290:290:293:296	347:353:356:356	206:212:212:212
44,	246:246:246:246	217:217:217:217	259:265:271:271	188:188:188:190	209:215:218:218	187:187:187:187	238:238:238:238	208:208:208:208	244:244:254:256	242:246:246:246	247:253:261:261	332:332:332:332	284:284:286:288	249:249:251:251	186:188:188:194	292:292:296:298	208:208:208:212	290:290:294:294	260:260:266:266	290:290:296:296	344:350:356:356	206:206:209:209
45,	246:246:246:246	217:217:217:217	259:265:271:271	188:188:188:190	209:215:218:218	187:187:187:187	238:238:238:238	208:208:208:208	244:244:254:256	242:242:246:246	247:253:261:261	332:332:332:332	284:284:286:288	249:249:251:251	186:188:188:194	292:292:296:298	208:208:208:212	290:290:294:294	260:260:266:266	290:290:296:296	344:350:356:356	206:206:209:209
46,	246:246:246:246	217:217:217:217	259:265:271:271	188:188:188:190	209:215:218:218	187:187:187:187	238:238:238:238	208:208:208:208	244:244:254:256	240:242:244:246	247:253:261:261	332:332:332:332	284:284:286:288	249:249:251:251	186:186:188:194	miss:miss:miss:miss	208:208:208:210	288:288:290:294	260:263:266:278	290:290:296:296	344:350:356:356	206:206:209:209
47,	246:246:246:246	217:217:217:217	257:259:259:263	188:188:190:190	215:215:215:215	187:187:187:187	238:238:238:238	208:208:208:208	240:254:258:260	234:242:242:244	253:253:257:257	332:332:332:332	284:286:286:290	249:249:251:251	186:186:188:188	miss:miss:miss:miss	208:208:208:210	288:288:288:288	263:263:263:278	290:293:296:296	317:356:356:356	212:212:212:212
48,	246:246:246:246	217:217:217:220	257:257:259:267	188:188:188:190	209:215:215:218	187:187:199:199	216:216:216:238	205:205:205:208	244:244:250:250	236:236:240:240	247:247:253:253	332:332:332:332	284:284:284:284	245:249:263:263	186:186:190:192	292:292:296:296	208:208:210:210	288:288:288:288	266:266:266:266	290:293:296:296	356:356:356:356	209:209:212:212
49,	246:246:250:250	217:217:217:220	259:259:259:273	188:188:190:190	212:215:218:218	187:187:190:190	miss:miss:miss:miss	205:208:208:208	244:254:256:260	238:238:240:240	245:245:247:261	334:334:334:334	284:284:286:286	249:249:251:261	186:186:188:192	292:292:292:292	208:208:210:210	288:288:288:288	248:248:266:269	296:296:296:296	miss:miss:miss:miss	209:209:209:209
pop 3
50,	242:246:250:250	211:217:220:226	259:259:263:269	188:188:188:190	215:215:218:224	187:187:190:199	234:238:238:238	208:208:208:208	240:246:264:268	240:240:244:244	245:247:263:265	332:332:332:332	284:284:284:284	245:249:249:265	186:186:186:186	294:294:294:294	208:210:210:214	288:288:288:298	248:248:260:281	296:296:296:296	344:353:353:356	206:209:209:209
51,	242:242:244:246	211:214:214:217	259:259:259:271	188:188:190:190	215:215:215:218	187:187:190:199	220:230:238:238	205:208:208:208	240:244:244:260	238:240:240:242	245:253:253:253	338:338:342:342	284:286:286:292	249:251:251:251	186:186:186:190	292:292:292:292	208:208:208:210	288:288:288:288	248:248:263:263	290:290:293:296	356:356:356:356	209:212:212:212
52,	244:252:252:262	211:217:217:220	259:267:267:275	188:188:188:190	215:215:215:218	187:187:187:199	224:224:238:246	205:208:208:208	244:244:244:266	234:236:238:240	243:245:261:263	330:334:338:338	284:284:286:286	249:251:257:259	184:186:186:190	292:292:294:294	208:208:208:208	288:288:288:288	266:266:266:266	293:296:296:296	344:353:353:356	206:212:212:212
53,	244:254:262:262	217:217:217:217	259:259:259:263	188:188:188:190	215:218:221:227	187:187:187:193	238:238:238:238	205:205:208:208	240:250:254:256	234:234:242:248	253:253:257:263	334:334:336:338	284:284:286:290	249:251:251:257	186:186:186:190	296:296:296:296	208:208:208:210	288:288:290:296	266:266:269:272	290:296:296:296	353:353:356:356	209:212:212:212
54,	242:244:246:254	211:217:217:217	257:259:259:265	188:188:190:190	miss:miss:miss:miss	187:187:187:190	228:234:238:238	205:208:208:208	240:258:260:262	234:236:238:240	245:253:253:257	334:334:334:338	284:286:290:290	245:249:249:251	184:186:186:186	296:296:296:296	208:208:210:212	272:286:286:286	263:263:263:263	290:296:296:299	353:356:356:356	206:212:212:212
55,	miss:miss:miss:miss	217:217:220:220	257:257:259:271	188:188:188:190	209:215:218:218	187:187:190:190	226:228:238:238	205:205:208:208	miss:miss:miss:miss	242:242:242:244	243:247:247:247	330:332:334:338	284:284:286:286	249:249:251:251	184:186:188:190	292:292:294:294	208:210:212:214	miss:miss:miss:miss	263:263:266:266	290:290:296:296	353:356:356:356	209:209:209:209
56,	246:250:252:254	211:217:217:217	259:259:259:271	188:188:188:188	215:215:215:218	187:187:187:199	226:228:238:238	205:205:208:208	240:244:248:256	236:238:240:244	243:253:253:253	332:332:334:334	284:286:286:290	249:251:251:251	188:188:188:190	292:292:292:292	208:208:214:214	288:294:294:296	263:263:263:263	290:296:296:296	344:353:356:356	206:206:212:221
57,	246:246:256:262	217:217:217:220	259:259:259:269	188:190:190:190	215:215:215:218	187:187:187:187	220:234:238:238	208:208:208:208	240:244:246:254	232:236:238:240	243:247:263:263	334:338:338:340	286:286:286:292	245:249:251:251	186:186:186:190	292:294:294:296	208:208:208:212	288:288:290:296	263:269:269:269	290:293:296:299	353:353:353:353	212:212:212:215
58,	246:246:246:256	211:217:217:238	257:259:267:271	188:190:190:190	209:209:215:221	187:187:187:187	238:238:238:246	205:208:208:208	244:244:246:250	240:240:246:250	243:245:253:253	332:332:334:334	284:284:284:288	249:249:251:257	186:186:188:194	296:296:296:296	208:210:210:220	288:288:288:288	260:263:266:266	296:296:296:302	317:356:356:356	209:209:209:209
59,	242:246:246:246	214:214:214:214	259:259:259:281	188:190:190:190	209:218:218:218	187:187:190:196	220:234:234:236	205:205:208:211	244:244:254:260	232:238:240:240	239:245:247:253	334:334:334:334	286:286:286:288	249:251:251:251	186:186:186:190	miss:miss:miss:miss	208:208:208:212	288:288:294:296	266:269:269:275	290:290:290:296	344:353:353:356	212:212:212:215
60,	242:246:252:262	217:217:217:220	259:263:265:271	188:188:190:190	209:215:215:215	187:187:187:190	216:238:238:246	205:205:205:211	244:254:254:266	234:236:238:240	243:247:261:263	334:334:334:336	286:286:286:286	249:249:249:251	186:186:186:186	miss:miss:miss:miss	208:210:218:220	286:286:288:288	263:266:266:272	290:290:290:296	353:356:356:359	209:209:212:218
61,	246:250:250:262	211:217:220:220	259:259:259:259	188:190:190:190	215:215:218:218	187:187:187:196	222:224:238:238	205:205:208:208	240:244:250:256	236:240:242:244	245:247:253:253	332:334:334:336	284:284:286:286	249:251:251:251	186:186:186:186	296:296:296:296	208:208:210:210	296:296:296:298	248:248:248:248	290:290:290:293	350:350:353:359	209:209:212:215
62,	242:244:250:254	211:217:217:217	259:259:259:271	188:190:190:190	215:215:218:218	187:187:190:199	238:238:238:238	208:208:208:208	240:256:262:268	234:240:242:244	249:249:249:249	332:336:338:338	284:284:286:292	245:249:251:261	186:186:186:186	292:292:294:294	208:208:208:210	290:290:290:290	266:266:272:272	290:290:290:296	353:353:356:356	209:209:209:212
63,	242:250:254:256	211:217:217:220	257:265:269:281	188:188:188:190	215:215:215:218	187:187:187:196	234:234:238:238	208:208:208:208	240:246:250:254	232:232:232:240	239:247:253:255	334:334:334:338	284:286:288:288	249:249:251:261	186:186:186:186	294:294:296:296	208:208:210:216	288:288:288:290	269:269:269:269	290:296:296:299	350:350:353:356	209:212:212:215
64,	246:246:246:252	211:211:211:217	257:259:267:271	188:188:190:190	209:215:215:215	187:187:190:199	224:238:238:246	205:208:208:208	242:244:246:258	234:236:238:240	245:247:253:253	330:330:332:334	286:286:286:286	249:249:251:253	184:186:186:190	292:294:294:294	208:208:210:212	288:288:288:288	263:263:263:263	290:293:296:296	344:350:353:356	206:209:209:212
65,	244:246:246:250	211:211:217:220	259:259:271:273	188:188:188:190	215:215:215:215	187:187:190:199	234:234:234:246	205:205:208:208	244:244:254:256	236:238:240:244	261:261:263:263	330:332:334:334	284:284:284:286	245:245:249:251	190:190:190:204	296:296:296:296	208:208:208:210	288:288:288:298	260:260:266:266	290:290:293:296	344:344:356:356	209:209:209:212
66,	242:246:254:256	217:217:217:217	257:269:269:281	190:190:190:190	215:215:215:218	187:190:196:199	216:220:238:242	205:208:208:208	240:240:250:260	234:234:236:236	239:245:253:253	330:332:334:334	284:286:288:290	245:249:251:251	186:186:186:186	296:296:298:298	208:208:208:212	288:288:288:288	266:269:272:272	290:293:293:299	353:353:356:356	209:209:212:215
67,	244:246:246:252	211:217:217:220	259:259:259:269	188:188:188:190	209:215:218:218	187:187:187:199	226:238:246:246	205:205:208:208	238:240:264:266	244:264:264:264	239:247:255:263	330:332:338:338	284:284:286:286	249:251:251:251	186:186:188:190	296:296:296:296	208:208:210:210	288:288:288:290	263:266:272:281	290:296:296:296	332:344:356:356	209:209:212:218
68,	242:244:244:244	217:217:217:226	259:259:265:281	188:188:188:188	215:215:218:218	178:187:187:196	216:220:224:236	205:208:208:208	240:244:250:250	238:240:242:244	245:253:253:253	332:334:338:338	284:284:286:286	249:249:251:251	186:186:186:188	294:294:294:294	208:208:210:212	288:288:296:296	263:269:269:272	290:290:290:293	350:356:356:356	209:212:212:212
69,	242:246:246:246	217:217:217:220	259:259:267:273	188:188:190:190	209:215:215:218	187:187:187:187	238:238:238:238	205:205:205:208	244:244:254:254	232:234:236:240	245:251:253:253	332:332:336:338	284:284:284:286	249:251:251:261	186:186:188:188	292:294:296:298	208:210:210:214	288:288:288:296	248:248:263:266	290:290:293:296	320:353:353:353	212:212:218:221
70,	242:246:248:262	217:217:217:217	259:259:259:265	188:188:190:190	206:209:218:224	187:187:187:190	234:234:238:238	208:208:208:211	244:246:254:260	236:238:240:242	239:239:245:253	332:334:334:338	286:286:286:288	249:251:251:251	186:186:186:190	292:292:292:292	208:208:210:210	miss:miss:miss:miss	263:266:266:275	290:293:296:296	344:356:356:356	209:209:209:212
71,	246:246:250:254	211:217:220:226	257:257:259:265	188:188:188:188	209:215:215:215	187:187:190:196	238:238:238:238	205:208:208:208	240:244:250:254	232:232:240:242	239:243:245:255	334:334:334:338	284:286:288:288	245:249:251:261	186:186:186:188	294:294:294:294	208:208:210:210	292:292:292:292	miss:miss:miss:miss	296:296:299:299	350:350:353:356	209:209:212:218
72,	244:246:246:252	217:217:217:220	261:265:273:277	188:188:190:190	215:215:215:218	187:187:187:190	226:238:238:238	208:208:208:208	240:246:248:256	240:244:244:244	245:247:247:263	334:334:334:344	284:284:286:288	249:249:251:251	186:186:188:188	296:296:296:296	208:210:210:210	288:288:290:290	257:257:266:278	290:290:290:296	353:356:356:356	206:209:209:209
73,	244:246:246:262	217:217:220:220	257:259:267:267	188:188:190:190	215:215:218:218	187:187:193:199	224:228:238:238	205:205:208:208	250:254:256:256	234:234:236:248	243:245:253:253	334:334:334:338	286:286:286:290	249:251:251:259	186:186:186:190	miss:miss:miss:miss	208:208:210:210	288:288:290:298	263:263:263:272	290:290:296:296	353:356:356:359	209:209:212:218
74,	246:246:254:262	211:214:217:223	257:259:265:265	188:188:188:190	209:215:215:215	187:190:196:199	226:236:238:238	208:208:208:208	246:256:256:260	236:236:236:244	245:245:245:245	334:334:334:336	284:284:284:284	245:251:251:257	186:186:186:186	292:294:298:300	208:208:210:220	284:290:290:290	263:266:266:266	290:293:296:296	356:356:356:356	209:209:209:209
75,	242:246:246:252	217:217:217:220	259:259:265:273	188:188:188:190	209:215:218:218	187:187:187:187	238:238:238:238	208:208:208:208	250:256:258:258	240:240:240:240	247:247:247:247	332:332:332:338	284:284:284:288	245:249:251:257	186:186:188:190	298:298:298:298	208:208:210:210	290:290:290:294	275:275:275:275	290:296:296:296	350:350:356:356	200:200:209:212
76,	242:246:254:262	211:217:217:220	257:259:267:273	188:188:188:190	215:215:215:218	187:187:190:190	234:234:238:246	205:208:208:208	246:246:254:262	238:240:242:244	249:253:263:265	334:334:334:334	284:286:286:286	249:249:251:251	186:188:188:204	292:292:292:292	208:208:210:210	288:288:288:294	266:266:266:275	290:296:296:296	350:353:356:356	206:209:209:212
77,	242:246:246:250	211:217:217:220	257:263:263:271	188:188:190:190	212:215:215:215	187:187:187:190	228:238:238:246	205:205:208:208	244:246:254:256	234:234:234:240	237:243:253:263	332:332:332:338	284:286:288:292	249:249:251:251	186:186:186:194	292:294:296:296	208:208:208:210	274:288:288:288	248:266:269:272	290:290:296:296	350:353:353:356	212:212:215:218
78,	244:246:254:262	211:217:217:220	257:259:267:273	188:188:188:190	215:215:215:218	187:187:187:190	234:238:238:246	205:208:208:208	244:244:254:262	240:242:244:244	249:249:253:265	334:334:334:334	284:286:286:286	249:251:251:251	186:188:188:204	294:294:294:294	208:208:210:210	288:288:288:294	266:266:266:266	290:296:296:296	350:353:356:356	206:209:209:212
pop 4
79,	246:246:246:248	211:217:217:220	257:259:259:273	188:188:190:190	209:209:212:215	187:187:190:196	222:224:238:238	205:208:208:208	240:244:250:270	234:234:244:244	239:245:247:261	332:332:334:334	284:284:286:286	249:251:251:251	186:186:186:192	296:296:296:296	208:208:212:216	288:288:294:300	248:248:263:263	290:290:296:299	344:350:353:356	209:209:209:209
80,	246:246:248:248	211:217:220:226	257:259:267:273	188:188:188:188	209:215:215:218	187:187:187:187	miss:miss:miss:miss	205:205:205:208	240:252:258:258	232:240:240:244	245:245:255:255	328:328:334:338	284:284:286:286	249:249:251:251	184:186:186:190	294:294:294:294	208:210:210:210	282:288:288:300	263:263:266:266	290:290:296:296	350:356:356:356	209:212:212:212
81,	250:250:250:250	217:220:220:226	259:259:265:271	188:188:188:188	209:215:215:218	187:187:196:199	216:238:244:246	205:205:208:208	250:250:252:258	238:240:248:250	245:245:261:261	332:332:338:338	284:284:286:286	249:249:251:251	184:186:186:192	294:294:298:298	208:208:210:210	288:288:294:294	266:266:272:275	290:290:296:296	350:353:353:356	206:206:209:209
82,	246:246:246:250	217:217:217:226	257:259:271:275	188:188:190:190	209:215:215:218	187:187:187:187	222:234:238:246	208:208:208:208	250:258:258:262	234:240:240:244	245:245:247:247	332:334:334:344	284:284:286:286	245:251:265:267	186:186:186:188	292:292:292:292	208:208:210:210	300:300:300:300	248:248:263:266	290:296:296:296	353:353:353:356	209:209:212:218
83,	246:246:248:248	217:217:217:220	259:265:271:271	188:188:188:188	215:215:218:218	187:187:190:199	238:238:238:238	208:208:208:208	240:244:244:250	236:240:240:246	249:249:261:261	332:332:332:332	286:286:286:286	239:249:251:263	184:186:186:190	292:292:292:292	208:208:208:208	288:288:288:288	266:266:266:272	290:296:296:296	350:350:350:350	209:209:212:218
84,	miss:miss:miss:miss	217:217:217:217	259:265:265:273	188:188:190:190	209:215:215:218	187:187:187:187	232:238:238:246	208:208:208:208	244:244:244:250	240:240:244:246	247:247:253:253	332:332:332:336	284:286:286:286	245:249:251:251	186:186:190:192	miss:miss:miss:miss	208:208:210:216	288:288:288:288	266:266:266:266	290:290:296:296	317:350:353:356	209:212:212:218
85,	246:246:246:250	217:217:217:220	257:257:259:267	190:190:190:190	215:218:218:218	187:187:187:199	232:232:238:238	205:208:208:208	250:250:260:268	232:232:232:236	239:239:243:265	328:334:334:338	284:284:286:286	249:249:251:251	182:186:186:190	miss:miss:miss:miss	208:210:210:218	288:288:288:288	263:263:266:266	290:290:296:296	317:347:353:353	209:209:209:212
86,	246:246:250:250	211:211:217:217	259:259:263:263	188:188:190:190	209:212:215:218	187:187:187:187	miss:miss:miss:miss	205:208:208:208	240:240:252:256	234:234:236:236	245:245:253:261	334:334:342:342	284:284:286:288	245:249:251:251	182:186:186:190	292:292:294:294	208:210:210:210	288:288:288:298	263:266:266:269	290:290:290:296	353:356:356:356	206:209:209:212
87,	242:246:246:250	217:217:217:220	257:259:259:259	188:190:190:190	215:215:215:215	187:187:190:196	238:238:238:238	205:208:208:208	244:250:252:260	242:242:242:242	249:253:259:261	328:328:332:338	286:286:286:288	245:245:251:251	186:186:186:188	miss:miss:miss:miss	208:208:210:210	274:288:296:300	263:263:266:266	290:296:296:296	317:356:356:356	212:212:218:218
88,	246:246:246:250	211:211:217:217	257:259:269:269	188:188:188:188	209:215:215:218	187:187:190:196	228:228:238:238	205:208:208:208	240:244:248:256	234:240:242:248	247:253:261:261	332:332:332:338	284:284:288:290	245:251:251:251	186:186:190:194	294:294:294:294	208:208:210:216	290:290:290:290	263:266:266:269	296:296:296:302	353:356:356:356	206:206:209:212
89,	miss:miss:miss:miss	217:217:217:217	259:259:259:259	miss:miss:miss:miss	215:215:215:218	187:187:187:187	miss:miss:miss:miss	205:205:208:208	miss:miss:miss:miss	232:242:248:248	243:253:253:255	miss:miss:miss:miss	284:286:290:292	miss:miss:miss:miss	186:186:186:188	miss:miss:miss:miss	208:208:210:216	288:288:288:288	248:248:266:266	290:290:296:299	350:353:353:356	206:212:212:212
90,	246:246:246:246	211:217:217:217	259:259:265:269	188:188:188:190	215:215:215:215	187:187:187:196	234:234:238:238	208:208:208:208	244:258:262:264	240:240:250:250	243:243:257:257	332:332:332:332	284:284:286:286	245:245:249:251	182:186:186:190	294:294:294:294	208:208:208:208	278:290:298:300	263:263:266:266	296:296:296:296	356:356:356:356	209:209:209:209
91,	244:246:246:248	211:217:220:220	259:259:259:259	188:188:190:190	215:215:218:218	187:187:187:187	220:220:220:238	205:208:208:208	miss:miss:miss:miss	232:232:232:232	239:239:249:249	332:332:332:336	284:284:284:286	245:249:251:251	186:186:190:190	292:292:294:294	208:210:210:220	288:288:288:288	263:263:266:266	290:290:296:302	350:353:356:356	212:212:212:212
92,	246:246:250:250	217:217:217:217	257:259:259:259	188:188:190:190	215:218:218:218	187:187:187:199	230:234:238:238	miss:miss:miss:miss	240:244:252:264	234:236:236:240	243:253:259:261	328:328:332:332	284:286:288:290	249:251:251:251	186:186:186:188	290:290:290:290	208:208:210:214	290:290:296:300	266:266:266:272	290:290:290:296	317:317:350:356	206:209:209:212
93,	246:246:246:248	211:211:211:217	259:259:263:263	188:188:188:190	209:215:215:218	187:187:187:199	222:238:238:238	205:205:205:208	244:244:244:258	232:232:236:244	245:245:245:247	332:332:332:340	284:286:286:292	239:251:251:263	184:186:186:190	298:298:298:298	210:210:210:214	284:284:288:288	266:266:266:266	290:290:293:296	356:356:356:359	209:209:212:218
94,	246:246:246:246	211:217:217:217	259:259:259:271	188:188:190:190	215:215:215:218	187:187:187:187	228:228:238:238	205:208:208:208	240:252:258:260	240:240:240:246	239:239:249:255	328:332:332:336	284:286:292:294	249:249:249:249	186:186:186:186	miss:miss:miss:miss	208:208:210:210	288:288:306:306	248:248:260:266	290:290:290:290	350:353:356:356	212:212:212:212
95,	246:246:246:248	211:217:220:220	259:259:259:271	miss:miss:miss:miss	miss:miss:miss:miss	187:187:187:199	228:228:238:238	208:208:208:208	244:244:250:250	234:240:240:240	261:261:261:261	332:338:338:338	284:286:288:290	249:249:251:251	186:186:188:188	296:296:304:304	208:208:208:210	290:290:290:290	248:248:266:266	290:290:293:296	344:350:356:356	209:209:209:209
96,	246:246:246:246	211:217:217:217	259:259:259:271	188:188:190:190	212:215:215:215	187:187:190:190	234:234:238:246	205:208:208:208	244:244:250:260	234:234:240:242	miss:miss:miss:miss	328:332:338:344	284:284:286:288	249:249:251:251	182:186:188:204	294:294:296:298	208:212:212:214	288:288:288:288	263:263:275:275	290:296:296:296	miss:miss:miss:miss	206:206:209:209
97,	246:246:246:246	217:217:217:217	259:259:259:269	188:190:190:190	215:215:215:215	187:187:187:187	224:224:224:224	208:208:208:208	244:244:258:266	246:246:246:246	253:253:255:255	332:332:332:332	284:286:288:290	251:251:251:251	186:186:186:186	292:292:294:294	208:208:208:208	miss:miss:miss:miss	248:263:263:266	290:290:290:296	353:353:356:356	209:209:218:218
98,	246:246:246:250	211:217:217:217	259:259:259:271	188:188:188:190	209:215:215:215	187:187:187:199	216:216:238:238	208:208:208:208	264:264:264:264	242:242:244:244	239:247:253:261	332:332:332:338	284:286:288:290	239:251:251:251	186:186:186:190	294:294:296:296	208:208:210:210	288:288:288:288	263:263:263:263	290:296:296:299	353:353:356:356	209:212:212:212
99,	246:246:248:262	217:220:220:220	257:259:259:259	188:188:190:190	209:215:215:215	187:187:187:190	238:238:238:238	205:208:208:208	240:244:258:260	234:240:242:244	247:247:247:247	328:332:334:338	284:284:290:290	239:249:249:263	184:186:186:190	292:292:296:298	208:208:208:210	288:288:288:300	263:263:263:263	290:290:296:296	350:353:356:356	206:209:209:212
100,	246:246:250:250	211:217:220:220	257:259:259:271	188:188:188:190	206:209:215:218	miss:miss:miss:miss	238:238:238:238	205:208:208:208	244:246:256:256	240:240:242:244	243:243:243:243	332:332:338:338	284:286:286:288	251:251:253:255	184:186:186:186	292:292:292:298	208:208:210:216	288:288:288:290	248:248:263:266	290:296:296:296	341:353:353:356	206:209:212:212
101,	246:246:246:246	217:217:217:217	259:259:259:259	188:188:190:190	215:215:215:218	187:187:187:187	238:238:238:238	205:205:208:208	240:240:254:262	236:236:236:236	239:239:253:261	332:332:336:336	284:284:286:288	247:251:251:251	186:186:186:190	292:292:292:292	208:208:208:212	290:290:292:292	248:248:263:272	290:296:296:296	350:353:356:359	209:209:209:218
102,	246:246:248:248	217:217:217:220	257:267:271:275	188:188:190:190	215:215:218:218	187:187:187:199	238:238:238:238	208:208:208:208	250:252:256:258	244:244:244:252	245:245:245:247	332:332:332:336	284:284:284:290	245:249:249:249	186:186:186:190	292:292:294:294	208:208:210:210	288:288:288:290	266:266:266:266	290:293:296:296	317:317:353:356	209:209:209:212
103,	246:246:246:248	217:217:217:217	259:259:267:267	188:188:190:190	209:215:215:218	miss:miss:miss:miss	228:238:238:238	205:205:208:208	250:256:258:260	232:232:242:242	239:239:255:255	332:332:340:340	284:284:284:286	245:249:249:251	186:186:186:188	292:292:298:298	208:208:210:210	288:288:288:288	263:263:266:266	290:293:296:296	353:353:353:356	206:209:212:215
104,	246:246:246:246	211:217:217:217	259:259:259:271	188:188:188:190	209:215:218:221	187:187:190:190	238:238:238:238	205:205:208:208	244:244:254:256	234:240:240:242	243:243:245:245	332:332:332:332	284:284:286:286	245:249:251:253	190:194:194:194	292:294:294:296	208:208:210:210	288:288:288:288	266:266:272:278	290:290:296:302	317:317:317:353	212:212:218:218
105,	246:246:246:246	211:217:217:217	263:265:271:271	188:188:190:190	215:218:218:221	187:187:187:187	220:220:228:228	205:208:208:208	240:244:252:256	234:234:234:240	253:255:255:261	338:338:338:344	284:286:286:292	249:251:251:253	184:186:186:186	294:294:296:296	210:210:210:210	288:288:290:290	263:266:266:272	296:296:296:296	353:356:356:356	miss:miss:miss:miss
106,	246:246:246:246	217:217:217:220	259:259:265:267	188:188:188:190	215:215:215:215	187:190:190:196	228:228:238:246	205:208:208:208	240:258:258:260	234:240:242:242	247:247:253:261	332:332:338:338	284:286:288:290	249:251:251:251	186:186:186:186	292:292:294:294	208:208:210:220	272:272:290:290	263:263:272:272	296:296:296:305	353:353:353:353	209:212:212:212
107,	246:246:250:262	211:217:217:220	257:257:265:271	188:188:188:188	miss:miss:miss:miss	miss:miss:miss:miss	238:238:238:238	205:205:208:208	240:246:254:264	240:240:240:242	261:261:261:261	332:332:332:332	286:286:286:292	251:253:257:259	186:186:186:186	miss:miss:miss:miss	210:210:210:210	274:288:288:290	263:263:266:266	296:296:296:296	miss:miss:miss:miss	209:209:212:212
108,	250:250:250:250	211:217:217:226	259:265:271:273	188:188:190:190	209:215:215:215	187:187:190:199	216:228:238:238	208:208:208:211	240:244:250:254	234:240:242:242	243:243:263:267	328:332:332:334	284:284:286:286	245:247:247:249	184:186:188:190	294:294:298:298	208:208:212:216	288:288:288:296	263:263:266:266	290:293:296:302	353:356:356:356	206:206:206:212
109,	242:248:248:250	211:211:217:226	269:269:269:271	188:188:188:190	215:215:215:218	187:187:187:190	238:238:238:238	205:208:208:208	244:256:258:268	234:240:248:248	239:239:253:253	330:334:334:340	284:284:284:284	251:251:251:255	184:186:186:186	miss:miss:miss:miss	208:210:210:216	274:274:288:288	263:263:263:266	290:290:293:296	350:356:356:356	212:212:212:212
110,	242:248:248:250	211:211:217:220	257:259:259:265	188:188:188:188	209:215:215:221	187:187:187:187	222:238:238:238	205:208:208:208	240:244:254:258	236:236:240:240	239:239:253:255	332:332:336:338	284:284:286:286	251:251:251:253	186:186:188:192	294:294:298:298	208:210:210:210	288:288:290:296	263:272:272:275	296:296:296:299	353:353:356:356	212:212:212:212
pop 5
111,	250:250:250:250	211:217:217:217	257:259:259:271	188:188:188:188	209:215:215:215	187:187:190:190	238:238:238:238	208:208:208:208	246:254:254:264	234:240:254:254	247:261:261:261	332:332:332:332	284:286:286:288	249:249:249:249	186:186:186:188	292:296:296:296	208:208:210:210	274:274:290:290	248:248:263:272	296:296:296:299	350:353:356:356	209:209:218:218
112,	244:248:248:248	217:217:217:220	257:257:259:271	188:188:190:190	215:215:218:218	187:187:187:187	224:224:224:224	205:208:208:208	240:244:244:256	236:236:236:244	255:255:257:263	332:332:338:338	284:284:286:286	245:245:251:251	186:186:190:192	miss:miss:miss:miss	208:208:210:210	288:288:288:288	266:266:272:272	290:293:296:299	353:353:356:356	206:209:212:221
113,	246:246:248:248	217:217:217:223	257:263:265:281	188:188:188:190	215:215:215:224	178:178:178:187	238:238:238:238	205:205:205:208	240:244:250:264	234:238:240:240	245:245:247:247	332:338:338:338	284:284:286:286	249:249:251:255	186:186:186:186	miss:miss:miss:miss	208:210:210:210	288:288:288:288	266:266:275:275	290:290:293:296	353:353:356:356	206:209:212:215
114,	242:244:246:250	211:217:217:217	miss:miss:miss:miss	188:188:190:190	215:215:215:218	187:187:187:190	238:238:238:238	208:208:208:208	244:244:250:256	240:242:242:248	245:245:245:253	332:334:334:334	284:284:286:286	245:249:251:261	184:186:186:190	miss:miss:miss:miss	208:208:210:210	288:288:288:288	248:248:263:266	290:290:296:302	356:356:356:356	209:212:212:215
115,	246:246:246:248	217:217:217:217	257:259:259:271	188:188:188:188	209:212:215:215	187:187:187:187	238:238:246:246	208:208:208:208	242:242:250:250	240:240:242:242	243:243:253:253	328:328:332:336	284:284:284:286	245:249:251:251	186:186:188:188	292:292:292:292	208:208:210:220	284:288:294:296	263:263:263:263	290:296:296:299	356:356:356:356	206:209:209:212
116,	244:244:244:248	217:217:220:220	259:259:259:271	188:188:188:190	209:209:215:218	187:187:187:187	238:238:238:246	205:208:208:208	244:244:250:250	240:240:240:240	253:253:253:253	332:338:338:338	284:284:286:286	249:251:251:251	186:186:186:186	miss:miss:miss:miss	208:210:210:210	288:288:288:296	248:263:263:266	290:293:296:296	332:347:350:356	206:209:209:218
117,	246:246:246:246	211:211:217:220	257:257:263:271	188:188:188:190	215:215:215:218	187:190:196:199	238:238:238:238	205:205:208:208	244:250:262:264	232:232:246:250	239:239:247:247	332:332:338:338	284:286:288:292	239:249:249:251	186:192:194:204	292:294:294:296	208:208:208:208	282:288:290:296	263:263:263:266	290:296:296:296	353:356:356:359	200:200:206:209
118,	246:246:246:250	217:217:217:220	259:259:265:269	188:188:188:188	215:215:215:215	187:187:187:196	238:238:238:238	205:205:205:208	244:250:256:260	234:240:244:244	253:253:253:253	328:332:332:338	284:286:286:286	247:251:251:257	186:186:186:188	294:294:296:296	208:208:208:210	274:288:288:298	260:263:266:266	290:296:296:296	353:356:356:356	206:209:212:215
119,	246:246:246:246	211:217:220:220	259:259:259:259	188:188:190:190	209:209:215:221	187:187:187:196	228:228:232:232	miss:miss:miss:miss	240:244:244:244	236:236:240:244	243:243:245:253	328:332:332:332	284:284:286:286	249:249:251:257	186:186:186:188	292:292:294:296	210:210:210:210	278:288:288:290	272:272:283:283	290:296:296:296	miss:miss:miss:miss	209:209:212:215
120,	246:246:246:246	211:214:217:226	259:259:269:269	188:188:190:190	209:209:212:218	miss:miss:miss:miss	232:232:246:246	205:208:208:208	240:240:244:250	240:242:242:244	247:247:253:253	332:334:338:338	284:284:286:286	249:249:251:251	184:184:186:186	292:292:294:294	208:208:208:210	288:288:288:288	266:266:269:272	290:290:290:296	353:356:356:356	miss:miss:miss:miss
121,	246:246:246:246	217:217:220:220	259:265:269:271	188:188:190:190	209:215:215:218	187:187:190:196	230:238:238:246	205:208:208:208	240:244:252:256	240:240:240:240	247:247:247:247	332:332:332:336	284:284:284:284	239:245:249:251	186:186:186:186	292:292:294:294	208:208:208:208	288:288:294:302	263:266:266:269	290:290:290:290	341:350:359:359	206:209:212:218
122,	246:246:246:246	217:217:217:220	259:259:263:267	188:188:188:190	215:218:218:218	miss:miss:miss:miss	216:216:238:238	205:205:208:208	240:244:244:244	242:242:244:248	255:259:259:261	miss:miss:miss:miss	286:286:286:290	239:249:251:257	184:186:186:186	miss:miss:miss:miss	208:208:210:218	296:296:302:302	266:266:269:272	296:296:296:302	350:356:356:356	209:212:212:212
123,	miss:miss:miss:miss	217:217:217:220	259:259:265:271	188:188:188:190	215:215:215:215	miss:miss:miss:miss	miss:miss:miss:miss	208:208:208:208	244:244:252:264	240:244:248:250	255:255:255:263	332:332:332:334	284:286:286:288	239:245:249:251	186:186:186:186	294:294:294:294	208:208:210:210	272:272:290:296	266:266:278:278	290:293:296:296	353:353:356:359	206:209:212:221
124,	246:246:250:262	217:217:217:220	257:259:265:273	188:188:190:190	212:218:218:218	187:187:199:199	238:238:238:238	205:208:208:208	240:240:256:258	240:240:240:244	261:261:261:261	miss:miss:miss:miss	284:286:286:290	251:251:251:253	186:186:186:188	miss:miss:miss:miss	208:208:210:210	288:288:298:298	260:260:263:263	290:290:290:296	344:353:353:356	209:209:212:218
125,	miss:miss:miss:miss	211:217:217:220	miss:miss:miss:miss	miss:miss:miss:miss	209:215:215:221	miss:miss:miss:miss	miss:miss:miss:miss	205:205:208:211	miss:miss:miss:miss	234:234:244:244	247:247:261:261	332:332:336:338	284:284:286:288	miss:miss:miss:miss	186:186:186:186	miss:miss:miss:miss	208:208:208:208	288:288:288:288	260:260:266:266	290:296:296:296	356:356:356:356	209:209:212:212
126,	246:246:246:246	211:217:217:217	265:271:271:273	188:188:190:190	209:209:215:218	187:187:196:199	228:238:238:238	205:205:205:208	244:260:260:260	240:242:242:244	247:247:261:265	328:328:332:332	286:286:288:292	239:249:251:259	186:186:188:190	294:294:294:294	210:210:214:216	288:288:288:288	263:263:263:266	290:296:296:299	317:347:350:353	206:206:209:209
127,	246:246:250:250	211:217:217:220	259:265:267:271	188:188:190:190	209:215:215:218	187:187:187:190	234:234:238:238	205:208:208:208	244:244:244:262	240:240:240:242	239:243:245:253	332:332:332:332	284:284:290:290	239:245:251:255	186:190:190:192	miss:miss:miss:miss	208:208:208:208	288:288:296:302	257:257:266:281	290:293:296:296	314:353:353:356	206:206:209:215
128,	miss:miss:miss:miss	211:217:217:226	257:257:267:269	188:188:188:190	215:215:218:218	187:187:187:199	228:228:238:238	205:205:208:208	252:258:260:262	232:232:240:244	253:253:261:263	332:332:336:336	284:284:284:288	249:251:251:255	186:186:190:194	292:292:292:294	208:208:210:210	282:288:288:294	248:263:263:266	293:296:296:296	350:353:353:356	209:209:212:218
129,	246:246:246:246	217:217:217:220	259:259:265:271	186:188:188:190	209:215:215:218	187:187:190:199	228:228:246:246	205:208:208:208	240:242:244:244	242:242:244:246	239:247:247:249	332:332:338:338	284:284:284:286	251:251:251:257	186:186:186:190	294:294:296:296	208:210:216:218	274:276:284:294	248:248:248:248	290:296:296:299	353:353:353:353	206:209:209:209
130,	246:246:248:262	211:217:217:220	257:259:259:271	188:188:188:190	215:215:215:218	miss:miss:miss:miss	238:238:238:238	205:208:208:208	240:250:260:260	234:236:236:246	261:261:261:261	332:332:336:336	284:284:286:288	245:247:263:265	184:186:186:190	miss:miss:miss:miss	208:208:210:210	290:290:298:298	260:263:263:266	290:296:296:302	332:350:356:356	209:212:212:212
131,	246:246:246:246	217:217:220:220	257:259:259:269	188:188:188:190	212:215:218:224	187:187:187:187	220:234:238:238	205:208:208:208	240:242:244:244	234:234:244:244	239:253:253:253	328:328:332:334	284:284:286:286	245:249:249:249	186:186:188:188	miss:miss:miss:miss	210:210:210:210	298:298:298:298	266:266:266:269	290:293:296:296	350:350:356:356	206:209:209:212
132,	246:246:246:246	211:217:217:217	259:259:259:275	188:188:190:190	215:215:215:218	187:187:187:199	238:238:238:238	205:208:208:208	240:240:244:260	236:238:240:250	261:261:261:261	332:332:332:332	284:284:284:286	249:251:251:255	186:186:186:186	miss:miss:miss:miss	208:208:210:210	miss:miss:miss:miss	248:248:266:272	290:290:290:296	317:317:353:356	206:209:209:212
133,	246:246:250:250	217:217:217:220	257:259:269:269	188:188:188:190	209:212:215:218	187:187:187:199	miss:miss:miss:miss	208:208:208:208	244:258:260:268	236:236:240:242	247:247:261:261	332:336:338:338	284:284:284:292	239:245:251:259	186:186:186:190	292:292:294:294	208:208:210:214	272:288:288:288	257:260:266:266	290:293:296:296	353:356:356:356	209:209:212:221
134,	246:250:250:250	211:217:217:220	257:259:269:271	188:188:190:190	212:215:215:218	187:187:190:190	216:228:232:238	205:208:208:208	250:250:256:256	240:240:240:240	245:247:261:261	338:338:338:338	284:284:286:286	249:249:249:249	182:186:186:190	miss:miss:miss:miss	208:210:210:216	288:288:288:288	263:263:263:272	290:290:296:296	miss:miss:miss:miss	209:209:209:215
135,	246:246:246:246	211:217:217:220	259:259:259:267	188:188:188:190	206:215:218:224	187:187:190:190	226:238:238:240	205:208:208:208	240:252:260:262	240:240:244:244	253:255:261:265	332:332:336:336	284:286:286:288	245:251:251:255	186:188:188:188	292:292:292:292	208:208:208:208	274:274:274:274	272:272:272:272	290:290:290:296	344:350:353:356	209:209:209:209
136,	246:246:250:250	217:217:217:217	257:259:265:269	188:188:190:190	215:215:215:218	187:187:187:196	228:238:238:238	205:205:208:208	miss:miss:miss:miss	238:240:242:244	245:253:255:261	332:332:334:340	284:284:286:286	251:251:251:251	186:186:186:188	miss:miss:miss:miss	208:208:210:210	288:288:288:300	248:263:266:266	290:296:296:296	353:353:356:356	206:209:212:215
137,	246:246:250:250	217:217:217:220	257:259:259:279	188:188:188:190	209:215:218:218	187:187:187:187	234:238:238:238	205:205:208:208	240:244:250:256	240:242:242:246	243:243:245:247	332:332:336:336	284:284:286:286	249:249:249:249	184:186:186:186	292:292:296:296	208:208:208:210	274:284:290:296	263:266:266:266	290:290:296:296	350:350:356:356	209:212:212:218
138,	242:242:242:252	211:211:217:217	257:259:265:275	188:188:190:190	215:215:218:224	187:187:187:187	226:226:238:238	208:208:208:208	240:254:258:260	234:240:240:240	245:247:253:253	miss:miss:miss:miss	284:286:290:290	245:249:251:251	188:188:190:194	296:296:296:296	208:208:210:210	272:288:288:288	263:263:263:263	290:296:296:296	350:353:356:356	206:209:209:212
pop 6
139,	244:246:246:250	211:217:217:217	259:259:265:269	188:188:188:188	209:215:218:221	187:187:187:190	222:228:238:238	205:208:208:211	238:252:260:270	240:240:242:244	245:245:261:263	332:334:334:336	284:286:286:288	miss:miss:miss:miss	186:186:194:204	298:298:298:298	208:208:210:212	290:290:290:304	266:266:266:266	296:296:296:302	317:353:356:356	209:209:212:212
140,	248:248:248:248	211:217:217:217	257:259:265:271	188:188:190:190	209:212:215:215	187:187:187:190	224:224:238:238	205:208:208:208	244:250:252:262	240:240:240:240	239:239:253:263	332:334:334:336	284:284:286:288	249:249:251:251	186:186:186:186	292:292:294:294	208:208:210:212	288:288:288:288	260:260:266:266	290:296:296:296	350:350:353:353	206:209:212:221
141,	242:246:246:250	211:217:217:217	259:271:271:275	188:188:188:190	209:215:215:218	187:187:187:190	miss:miss:miss:miss	205:208:208:208	244:246:248:254	240:242:244:246	243:253:265:267	334:334:334:338	286:286:286:292	245:249:251:257	186:186:186:188	294:294:294:294	210:210:210:220	miss:miss:miss:miss	266:266:269:269	290:290:293:299	317:356:356:359	209:212:212:212
142,	242:246:248:256	211:217:217:217	259:259:263:265	188:190:190:190	209:215:215:218	187:187:187:187	228:228:236:238	205:205:205:208	240:244:250:256	232:242:242:246	247:253:253:263	332:332:332:332	284:284:286:290	245:251:259:263	186:186:186:188	290:296:296:304	208:208:208:212	272:288:288:302	248:263:266:272	296:296:296:299	350:353:353:353	206:209:209:212
143,	250:250:250:254	211:217:220:220	271:271:271:271	188:188:190:190	209:215:218:218	187:187:187:196	216:226:238:238	205:205:208:208	miss:miss:miss:miss	240:240:240:242	243:243:247:247	332:334:336:338	284:284:284:286	249:251:251:251	186:186:186:188	294:294:294:294	208:208:210:220	288:288:288:288	260:260:266:266	293:296:296:302	350:353:353:356	209:209:212:212
144,	246:246:246:246	211:217:217:220	259:259:259:269	188:188:190:190	215:218:218:218	187:187:187:199	228:228:238:238	208:208:208:208	240:244:244:244	238:240:242:246	245:249:253:267	332:334:334:338	284:286:288:292	249:249:251:251	186:186:186:190	294:294:294:294	208:208:210:210	288:288:288:296	260:263:266:269	290:296:296:296	353:356:356:356	206:209:209:212
145,	246:246:250:252	211:217:217:217	259:271:271:275	188:188:188:190	215:215:215:218	187:187:187:190	216:224:238:238	208:208:208:208	244:250:260:264	240:240:240:244	239:239:239:253	334:334:338:338	284:284:284:286	245:249:251:255	184:186:186:186	294:294:294:294	208:210:210:210	272:284:290:294	248:248:248:248	290:296:296:296	353:353:353:356	206:209:209:209
146,	246:246:246:248	217:217:217:217	257:259:259:271	188:190:190:190	215:215:218:218	187:190:199:199	220:228:228:228	205:205:208:208	254:258:258:266	234:242:244:244	245:245:253:253	332:334:334:336	miss:miss:miss:miss	249:251:251:253	186:186:186:190	292:292:292:292	208:208:208:210	272:288:288:290	266:266:266:266	290:293:296:296	356:356:356:356	206:206:209:209
147,	246:254:262:262	211:217:217:220	259:259:265:267	188:188:190:190	209:209:209:215	187:187:187:199	234:234:236:236	205:205:208:208	236:264:264:264	234:236:236:240	243:245:245:247	332:332:338:338	284:284:284:288	251:251:251:253	186:186:186:204	292:292:292:292	208:208:210:210	288:288:290:294	263:263:263:266	293:296:296:296	317:353:356:356	miss:miss:miss:miss
148,	246:246:246:252	217:217:217:220	259:259:265:267	188:188:190:190	miss:miss:miss:miss	187:187:187:199	228:228:228:238	205:208:208:208	246:250:256:260	236:238:240:242	245:257:257:263	332:334:334:338	284:284:286:288	249:249:249:251	184:186:186:186	292:292:292:292	208:208:210:220	288:288:288:288	263:263:266:272	290:290:293:296	332:347:353:356	209:209:212:212
149,	246:246:252:262	217:217:217:220	259:259:265:267	188:188:190:190	215:215:218:224	187:187:187:199	228:228:238:238	205:208:208:208	246:250:256:260	236:238:240:242	245:257:263:263	332:334:334:338	284:284:286:288	249:249:249:251	184:186:186:186	292:292:292:292	208:208:210:220	288:288:288:288	263:263:266:272	290:290:293:296	332:347:353:356	209:209:212:212
150,	246:246:246:252	211:217:217:220	259:259:259:267	188:190:190:190	215:215:215:218	187:187:187:190	234:234:238:246	205:208:208:208	244:244:254:254	240:242:242:244	253:253:261:263	330:334:336:338	284:284:284:284	249:249:249:257	184:186:186:190	292:292:292:292	208:208:210:210	276:276:290:296	248:263:266:269	293:293:296:296	353:353:353:356	206:209:209:212
151,	248:250:250:262	211:217:217:220	257:257:259:259	188:188:188:188	209:212:215:218	187:187:187:187	238:238:238:238	205:205:208:211	244:246:250:252	234:236:240:240	243:253:253:257	334:334:334:336	284:284:284:286	249:251:257:261	184:184:188:190	292:292:296:296	208:208:208:210	272:284:286:288	263:263:266:278	290:290:296:296	350:350:353:356	209:212:212:212
152,	246:246:250:262	211:217:217:220	259:259:259:259	188:188:188:188	215:215:215:218	187:187:187:187	226:238:238:238	205:205:208:211	244:244:250:252	234:236:240:240	245:245:253:257	336:336:334:336	284:284:284:286	241:249:257:261	186:186:188:190	294:294:296:296	208:208:208:210	288:288:286:288	266:266:266:278	290:290:296:296	311:317:353:356	209:212:212:212
153,	246:246:246:248	211:217:217:217	259:259:265:269	188:188:190:190	215:215:215:218	187:187:187:199	226:238:238:238	205:205:208:208	244:244:252:260	234:236:236:236	245:245:253:253	336:336:336:344	284:284:286:290	241:249:251:251	186:186:186:190	294:294:294:294	208:208:210:212	288:288:288:302	266:266:266:275	290:290:296:296	311:317:356:356	209:212:212:212
154,	246:248:248:250	217:226:226:226	259:259:261:265	188:188:188:190	215:215:215:221	187:187:187:196	224:238:238:238	205:208:208:211	240:246:254:266	238:240:240:240	247:253:253:253	332:332:332:334	284:286:286:286	249:251:251:251	186:186:188:192	294:294:294:294	208:208:208:210	288:288:290:302	248:248:266:272	290:293:293:296	356:356:356:356	206:209:209:209
155,	246:246:248:250	211:211:217:226	259:259:259:267	188:188:190:190	215:215:215:215	187:187:187:187	216:228:238:238	205:208:208:208	238:244:250:256	236:240:246:252	253:253:257:263	332:334:336:338	284:284:286:286	249:251:251:251	186:186:190:192	296:296:298:298	208:208:210:210	288:288:296:304	263:263:263:263	293:296:296:299	317:317:356:356	206:206:209:218
156,	242:244:248:248	217:220:220:226	259:261:265:271	188:190:190:190	209:215:215:218	187:187:187:187	238:238:238:238	205:208:208:208	244:250:254:258	240:240:240:244	239:239:239:239	334:334:334:336	284:284:286:286	245:249:249:249	186:186:186:192	292:292:294:294	208:208:208:214	290:292:294:296	266:266:266:266	290:293:296:296	311:317:356:356	209:209:209:212
157,	244:246:246:250	217:217:217:217	263:267:271:275	188:188:190:190	209:209:215:215	187:187:190:199	238:238:238:238	208:208:208:208	244:244:256:256	234:234:242:242	259:263:263:263	332:332:332:336	284:286:286:286	249:251:251:251	186:186:186:190	292:292:292:292	208:208:210:220	288:288:288:296	263:266:266:266	290:293:296:296	350:353:356:356	212:212:212:218
158,	miss:miss:miss:miss	211:217:220:223	miss:miss:miss:miss	188:188:190:190	miss:miss:miss:miss	187:187:187:190	216:234:238:238	208:208:208:211	246:250:256:258	240:242:242:242	miss:miss:miss:miss	miss:miss:miss:miss	284:284:286:290	249:253:253:253	186:186:190:194	miss:miss:miss:miss	miss:miss:miss:miss	288:288:294:296	miss:miss:miss:miss	290:290:290:293	344:350:356:356	miss:miss:miss:miss
159,	242:246:246:254	217:217:217:220	259:259:259:271	188:188:190:190	209:209:212:215	187:187:187:187	216:234:234:246	205:208:208:208	244:244:254:258	240:240:242:244	245:245:253:253	332:332:338:338	284:284:284:290	245:249:249:249	184:186:188:190	294:294:294:294	208:210:210:210	272:272:284:286	263:263:272:272	290:290:290:290	350:353:356:356	209:212:212:212
160,	242:246:246:250	211:211:217:220	265:265:267:271	188:188:190:190	215:215:218:221	187:187:187:187	232:234:238:246	208:208:208:208	240:244:252:254	232:232:232:244	245:245:263:267	330:332:336:338	284:286:286:288	247:251:251:255	186:186:186:188	292:292:292:292	208:208:210:212	290:290:290:298	248:263:263:281	290:290:296:296	350:353:353:356	203:206:209:212
161,	242:244:248:250	211:217:217:217	259:259:259:261	188:188:190:190	209:215:218:218	187:187:190:196	216:222:238:238	208:208:208:208	240:244:250:256	240:242:246:246	253:253:261:263	334:334:338:338	284:284:286:288	249:251:251:251	186:186:186:190	miss:miss:miss:miss	208:208:210:212	288:288:292:302	263:263:263:263	296:296:296:296	353:353:356:356	206:209:209:212
162,	246:246:248:254	211:211:217:217	259:265:269:271	188:188:190:190	215:215:215:224	187:187:187:190	238:238:238:238	205:205:208:208	244:246:250:258	238:238:240:244	245:247:253:263	miss:miss:miss:miss	284:284:286:288	249:251:251:251	184:184:186:188	296:296:296:296	208:210:212:212	288:288:288:290	miss:miss:miss:miss	296:296:296:299	356:356:356:356	209:212:212:212
163,	244:246:246:248	217:217:217:220	259:259:267:271	188:188:190:190	215:215:215:218	187:187:187:187	224:228:238:238	205:208:208:208	250:260:262:266	240:240:240:242	245:247:255:255	332:332:336:338	284:286:286:292	249:251:251:251	186:186:186:188	294:296:296:296	206:208:210:210	288:288:288:288	263:263:263:272	290:290:290:296	356:356:356:356	209:209:212:212
164,	242:246:248:252	211:217:217:217	257:257:257:269	188:188:188:190	215:215:215:218	187:187:187:190	238:238:238:238	205:205:205:208	240:246:250:252	236:236:240:240	247:253:253:259	332:332:338:338	284:286:286:292	249:249:249:251	184:186:186:190	298:298:298:298	208:208:210:214	288:288:290:296	248:263:263:266	296:296:296:296	353:356:356:356	206:209:209:218
165,	246:250:254:256	217:217:217:220	257:259:269:269	188:188:190:190	215:218:218:218	187:187:187:187	238:238:238:238	208:208:208:208	240:252:252:258	240:242:242:242	243:247:263:263	332:332:336:336	284:284:286:288	245:249:249:249	186:186:186:186	292:292:294:296	210:210:210:210	288:288:296:300	248:248:263:263	290:293:296:296	353:353:353:356	206:206:209:209
166,	246:246:246:250	217:217:220:220	257:259:259:271	188:188:188:188	215:215:215:218	187:187:187:190	238:238:238:246	205:208:208:208	246:246:252:256	234:240:258:260	245:245:255:263	330:336:340:340	284:286:286:286	249:249:251:251	184:186:190:190	292:292:296:296	208:208:208:210	288:288:288:298	266:266:266:266	290:293:293:296	332:353:353:356	206:206:206:209
167,	244:246:246:250	217:217:220:220	259:259:269:271	188:188:188:190	209:215:218:218	9:9:9:9	238:238:238:238	205:205:208:208	244:246:256:264	242:244:250:252	245:247:263:265	334:334:334:338	284:284:284:290	249:251:251:251	186:186:186:194	292:292:296:296	208:208:212:216	274:276:288:292	miss:miss:miss:miss	290:290:296:296	350:353:353:356	206:212:215:221
pop 7
168,	246:246:246:246	217:217:217:217	257:259:259:265	188:188:190:190	miss:miss:miss:miss	187:187:187:190	216:238:238:238	205:208:208:211	244:254:258:264	234:240:240:244	247:253:255:255	332:332:332:332	284:284:284:286	251:251:251:251	182:186:190:194	292:292:292:292	208:208:208:212	288:288:288:294	263:263:275:275	290:296:296:296	356:356:356:356	206:206:206:209
169,	246:250:250:250	217:217:217:220	259:259:265:273	188:188:188:188	215:218:218:218	miss:miss:miss:miss	232:238:238:238	205:208:208:208	244:244:254:264	238:238:240:240	257:257:261:265	332:332:338:338	284:284:286:286	245:249:249:251	184:186:186:188	294:294:294:294	208:208:208:216	288:288:288:294	248:248:260:266	290:290:290:296	350:356:356:356	209:212:215:218
170,	246:246:248:250	211:217:217:220	257:259:259:271	188:188:188:188	215:215:215:218	187:187:187:187	234:238:238:238	205:208:208:208	244:250:254:262	232:240:240:242	239:243:243:245	330:332:336:340	284:284:284:288	249:251:251:253	182:186:186:194	miss:miss:miss:miss	208:208:210:210	288:288:288:288	263:263:266:266	290:296:296:299	350:353:356:356	206:209:209:212
171,	246:246:248:252	211:217:220:220	259:269:273:275	188:188:188:190	206:209:215:218	187:187:187:187	238:238:238:238	205:205:208:211	246:252:254:258	234:236:236:236	253:253:253:257	miss:miss:miss:miss	miss:miss:miss:miss	239:249:251:251	186:186:188:190	294:294:296:296	208:208:208:208	290:290:294:294	263:263:272:272	miss:miss:miss:miss	353:353:356:356	212:212:212:212
172,	248:248:248:262	217:217:223:226	257:257:259:259	miss:miss:miss:miss	209:209:215:215	187:187:187:199	216:216:238:238	205:205:208:208	240:252:260:272	234:240:240:244	239:245:245:247	miss:miss:miss:miss	284:284:286:286	251:251:251:251	186:186:188:188	296:296:296:296	miss:miss:miss:miss	272:290:290:296	248:248:248:248	290:296:296:296	344:353:356:356	209:209:212:212
173,	246:246:246:256	217:217:217:217	257:259:259:269	188:188:190:190	215:218:218:221	187:187:187:199	228:228:238:238	208:208:208:211	240:244:254:268	234:240:244:244	259:259:261:261	332:332:332:338	284:286:288:288	249:249:251:251	186:186:186:194	296:296:296:296	208:208:210:210	274:296:296:296	263:263:263:272	290:293:296:296	317:317:341:344	206:209:209:212
174,	246:246:246:248	211:211:217:217	259:259:259:281	188:188:190:190	209:215:215:215	187:187:187:187	216:226:228:228	205:208:208:208	244:252:258:262	234:234:240:240	239:239:245:261	332:332:336:336	284:286:286:286	245:245:251:251	186:186:190:194	292:292:294:294	208:208:210:210	274:288:288:294	266:269:272:272	293:296:296:296	350:350:350:353	206:206:209:215
175,	244:246:246:246	217:217:217:220	257:259:265:265	188:188:188:190	209:215:215:218	187:187:187:199	228:238:238:238	205:208:208:208	240:246:250:254	234:238:242:242	253:253:261:261	332:332:332:332	284:286:288:290	249:249:251:253	186:186:186:186	miss:miss:miss:miss	208:208:210:210	276:276:296:302	248:263:263:266	296:296:296:296	350:353:353:356	209:209:218:218
176,	244:244:246:246	211:211:217:217	257:259:259:271	188:188:190:190	212:215:215:218	187:187:187:196	miss:miss:miss:miss	205:205:208:208	240:246:252:264	240:240:242:246	255:255:255:255	332:334:334:338	284:284:286:286	249:249:249:249	186:186:186:188	292:292:292:292	208:208:208:210	290:290:290:290	248:248:263:263	290:296:296:296	317:353:356:356	206:206:209:209
177,	244:248:250:250	211:211:217:220	259:259:265:265	188:188:188:190	209:209:215:215	187:187:187:187	238:238:238:238	205:205:205:208	miss:miss:miss:miss	236:236:236:244	245:245:253:261	332:332:334:334	284:284:286:288	251:251:251:251	186:186:186:190	292:292:294:294	208:208:214:218	288:288:288:288	266:266:283:283	290:296:296:302	344:350:356:356	209:209:212:212
178,	244:244:246:250	211:217:217:220	259:259:265:271	188:188:188:188	215:215:215:218	187:187:187:190	228:228:238:240	208:208:208:208	244:244:252:252	232:232:232:242	miss:miss:miss:miss	332:332:332:332	284:284:288:292	249:249:249:257	186:186:186:186	292:292:294:294	208:208:208:208	282:290:290:296	263:263:266:266	290:293:296:296	317:353:353:356	209:209:209:218
179,	246:246:248:248	217:217:220:220	257:259:259:267	188:188:190:190	215:215:215:218	187:187:187:187	222:230:234:238	208:208:208:208	240:244:252:264	236:236:244:246	239:239:253:261	328:328:336:336	284:284:286:286	245:245:251:251	184:188:190:192	296:296:296:296	208:208:208:208	288:288:288:288	260:260:263:266	290:290:293:296	350:353:353:353	209:209:209:218
180,	242:246:248:250	211:211:211:217	267:267:267:273	188:188:190:190	206:209:215:224	187:187:190:190	238:238:238:238	208:208:208:208	254:260:260:266	234:234:240:240	247:253:253:261	miss:miss:miss:miss	284:284:290:292	251:251:251:251	186:186:186:186	292:292:298:298	208:208:208:208	290:290:300:300	266:266:266:266	290:290:296:296	311:356:356:359	206:206:206:206
181,	246:246:248:262	217:217:217:217	259:259:259:271	188:188:188:190	209:212:215:218	187:187:187:187	miss:miss:miss:miss	208:208:208:208	250:250:256:258	234:238:240:244	247:247:261:261	332:332:332:332	284:284:286:286	251:251:251:251	186:188:190:192	292:292:298:298	208:208:210:210	288:288:290:290	260:263:266:269	290:290:290:296	350:353:356:356	206:209:212:215
182,	242:246:246:248	217:217:217:217	257:259:267:271	188:188:190:190	209:215:221:227	187:187:199:199	226:238:238:246	208:208:208:208	240:244:244:256	234:242:242:244	253:253:257:269	332:334:334:338	284:286:290:290	245:251:251:251	186:186:186:188	294:294:294:294	208:208:208:208	298:298:300:300	263:263:278:278	290:290:296:296	344:353:356:356	206:209:212:212
183,	242:246:248:248	211:217:217:217	257:259:259:271	188:188:190:190	209:215:218:227	miss:miss:miss:miss	miss:miss:miss:miss	205:205:208:208	244:244:258:262	234:234:244:244	247:247:261:265	332:332:332:332	284:284:286:286	239:247:249:251	186:186:186:194	292:292:292:292	208:208:212:216	274:274:288:288	266:266:272:272	290:296:296:302	353:353:356:356	212:212:212:212
184,	246:246:248:250	217:217:217:220	257:257:259:263	188:188:190:190	215:215:218:221	187:187:187:190	216:216:238:238	205:205:208:208	240:244:262:264	234:244:244:256	239:239:245:245	332:332:332:332	284:284:286:286	245:249:251:255	186:186:190:190	292:292:298:298	208:208:208:210	272:288:288:288	263:263:266:266	290:296:296:296	347:353:353:356	206:209:209:209
185,	248:250:250:262	217:217:217:217	257:259:267:269	188:188:188:190	215:215:215:218	187:187:187:190	238:238:238:238	205:208:208:208	244:256:258:258	236:236:242:242	253:253:253:261	332:332:332:332	284:284:284:284	249:251:251:253	186:188:188:190	292:292:292:292	208:208:208:208	276:288:290:298	266:266:266:266	290:290:296:296	332:344:350:356	212:212:212:212
186,	miss:miss:miss:miss	217:217:217:217	257:257:265:275	188:188:188:188	215:215:215:218	187:187:187:190	224:224:238:238	205:208:208:211	240:244:246:264	240:240:242:242	253:253:261:261	332:332:332:332	286:286:288:290	245:245:251:251	186:186:186:190	miss:miss:miss:miss	208:208:208:212	288:288:288:288	266:266:272:272	296:296:296:296	350:350:356:356	206:206:209:212
187,	246:246:246:248	217:217:217:220	257:257:259:271	188:188:188:190	215:215:218:218	187:187:187:190	234:234:238:238	205:208:208:208	240:244:258:258	234:234:240:240	245:253:253:253	332:336:336:338	284:284:286:286	239:251:251:255	182:186:186:192	292:292:292:292	208:208:210:210	290:290:294:294	257:266:266:272	290:296:296:296	350:350:353:356	206:209:209:212
188,	246:246:248:248	211:217:217:217	259:259:269:271	188:188:188:190	209:215:215:218	187:187:187:196	230:238:238:238	208:208:208:208	244:250:256:272	234:234:242:242	243:247:261:261	332:332:340:340	284:284:286:286	249:249:251:251	186:190:190:192	292:292:296:298	208:208:208:208	288:288:288:294	248:266:266:272	290:293:296:296	350:356:356:356	206:206:209:209
189,	246:246:246:250	211:211:217:220	259:259:261:269	188:188:190:192	209:209:218:218	180:187:187:190	224:238:238:238	205:208:208:208	240:244:244:262	234:240:240:242	253:253:263:263	338:338:338:338	284:284:284:284	249:251:251:259	186:186:194:204	292:294:294:294	208:208:210:210	288:288:288:302	269:269:269:269	290:290:296:296	347:350:350:350	206:206:209:218
190,	246:246:246:246	211:217:220:226	257:259:271:271	188:188:188:188	215:215:215:218	miss:miss:miss:miss	226:238:238:238	205:208:208:208	244:244:262:262	234:240:242:248	245:245:253:257	332:332:332:332	284:284:286:290	251:251:251:255	186:186:188:188	292:292:294:294	208:208:220:220	290:290:290:290	263:263:266:281	290:290:296:296	350:356:356:356	209:209:212:212
191,	246:246:246:262	211:211:217:217	257:259:265:269	188:188:190:198	212:215:218:218	187:187:199:199	234:238:238:238	208:208:208:208	244:244:254:262	234:240:242:242	247:253:265:265	332:332:332:332	284:284:286:286	245:247:249:251	186:186:186:194	290:290:290:290	208:208:208:212	300:300:300:300	266:266:266:266	290:296:296:296	356:356:356:356	209:209:209:209
192,	246:246:246:250	211:217:217:217	257:265:271:271	188:188:188:188	209:215:215:221	187:190:190:199	216:230:238:238	205:208:208:208	246:248:250:256	240:244:246:264	243:243:243:243	332:332:332:332	284:286:286:290	245:251:251:251	184:184:186:186	292:292:292:292	208:208:212:212	288:288:288:288	248:248:269:269	290:290:296:296	347:353:356:356	209:212:212:212
193,	244:246:246:248	211:211:217:220	257:259:265:271	188:188:190:190	209:215:218:221	miss:miss:miss:miss	220:228:238:246	205:208:208:208	240:244:250:256	miss:miss:miss:miss	245:247:255:257	332:332:332:332	284:284:286:286	miss:miss:miss:miss	186:186:186:186	296:296:296:296	208:208:208:210	miss:miss:miss:miss	248:260:266:278	290:290:296:296	317:320:353:356	209:209:212:212
194,	244:248:256:256	217:217:217:220	257:259:265:271	188:188:190:190	206:215:215:224	187:187:187:190	238:238:238:238	205:208:208:208	250:256:256:270	234:240:242:244	245:245:253:261	332:332:332:332	284:284:288:290	249:249:251:251	184:186:186:188	292:292:298:298	208:210:210:214	288:290:290:290	263:266:266:269	296:296:296:296	350:353:356:356	206:206:209:209
195,	242:244:246:252	217:217:217:217	259:259:271:275	188:188:190:190	215:215:218:218	187:187:187:187	234:238:238:238	205:208:208:208	244:246:256:260	234:242:242:244	247:247:249:249	330:332:338:338	284:284:284:286	247:251:251:263	184:186:186:186	miss:miss:miss:miss	208:208:210:214	288:288:298:300	266:266:266:266	293:296:299:299	332:350:356:356	206:206:206:206
196,	246:246:246:248	217:217:217:217	259:259:271:271	188:190:190:190	209:215:215:215	178:187:187:187	224:228:238:238	205:205:205:205	244:250:250:252	234:242:242:244	247:247:253:261	332:332:332:332	284:284:286:286	245:245:249:251	186:186:188:188	296:296:296:296	208:208:208:212	290:290:296:296	278:278:278:278	293:293:293:296	344:353:356:356	209:209:212:218
197,	246:246:246:246	217:217:217:217	257:257:257:259	188:188:188:190	209:209:218:218	miss:miss:miss:miss	miss:miss:miss:miss	208:208:208:211	244:244:254:258	234:240:242:244	245:245:247:253	332:332:332:338	284:284:286:290	239:249:249:257	186:186:186:188	292:292:292:296	208:208:208:208	288:288:288:288	260:263:266:269	290:290:293:296	332:341:356:359	miss:miss:miss:miss
198,	246:248:250:262	211:217:217:220	257:257:265:271	188:188:190:198	215:215:215:215	187:187:187:187	238:238:238:238	208:208:208:208	250:254:258:270	234:240:240:244	245:245:253:261	332:332:338:338	284:284:286:286	247:247:251:257	186:186:186:192	miss:miss:miss:miss	208:208:208:208	278:288:288:288	260:260:278:278	293:296:296:296	347:353:353:356	miss:miss:miss:miss
pop 8
199,	246:246:246:246	217:217:217:220	259:259:267:271	188:188:190:190	215:218:218:221	187:190:196:199	226:238:238:246	205:208:208:208	244:250:252:260	234:240:242:244	245:245:261:261	332:332:332:332	284:284:286:286	249:249:249:249	184:186:186:192	292:294:294:296	208:208:208:210	274:288:288:294	248:248:269:269	293:293:296:296	353:353:356:356	209:209:212:215
200,	246:246:246:250	211:211:217:217	257:259:273:281	188:188:190:190	209:215:218:218	187:187:187:187	226:226:232:232	208:208:208:208	244:250:258:258	234:240:242:242	239:239:253:253	328:328:332:336	284:284:286:290	245:253:255:257	184:186:186:186	292:292:292:292	206:210:210:210	274:288:288:288	266:266:272:272	290:296:296:296	344:344:356:356	209:209:212:212
201,	246:246:246:246	211:211:217:220	259:259:267:271	188:188:188:190	209:209:215:218	187:190:199:199	234:238:238:238	205:205:205:205	244:244:244:246	234:234:242:242	245:245:247:261	332:332:332:336	284:284:286:288	239:249:249:249	186:186:186:192	292:292:296:304	210:210:210:210	288:288:290:290	263:263:278:278	290:290:296:296	353:353:356:356	209:212:212:215
202,	242:246:248:250	217:217:217:220	259:271:271:281	188:188:188:190	206:212:215:224	187:187:187:187	234:234:238:238	205:205:208:208	240:250:254:258	234:240:242:242	247:247:253:253	332:332:332:332	284:284:286:286	249:249:249:249	186:186:188:192	298:298:298:298	208:208:210:210	274:274:288:290	266:266:272:283	290:293:293:296	356:356:356:356	209:209:209:209
203,	242:246:246:248	211:217:217:220	259:259:263:265	188:188:190:190	215:215:218:218	187:190:190:199	216:234:238:238	205:205:208:208	252:254:258:262	238:240:248:248	247:247:257:259	miss:miss:miss:miss	284:284:284:284	249:249:251:251	186:186:186:186	292:292:292:292	208:208:210:210	274:288:288:288	263:263:266:272	290:293:296:296	317:353:356:356	209:209:209:209
204,	246:246:248:248	211:217:217:217	257:259:269:271	188:188:190:190	215:215:218:218	187:187:187:190	228:228:228:232	208:208:208:208	miss:miss:miss:miss	234:236:236:248	255:255:255:255	332:332:332:332	284:284:286:286	249:251:257:257	184:184:186:190	292:292:292:292	208:208:210:210	288:288:302:302	248:263:263:266	290:296:296:296	317:350:353:353	209:209:209:212
205,	242:246:246:250	217:217:217:220	259:259:265:275	188:188:188:188	215:215:215:221	187:190:190:190	228:238:238:246	205:208:208:208	244:248:258:262	234:240:242:246	253:253:261:261	miss:miss:miss:miss	284:284:286:290	249:251:251:251	186:186:186:186	298:298:298:298	208:208:208:210	288:288:288:288	266:266:266:266	290:293:293:296	350:350:356:356	209:209:212:218
206,	246:246:246:248	211:211:217:217	259:259:267:271	188:188:190:190	209:215:218:218	190:199:199:199	238:238:238:238	205:205:208:208	244:244:254:258	234:234:234:240	247:253:253:261	334:334:334:334	284:286:286:290	245:251:251:251	186:186:188:188	294:294:296:304	208:208:210:210	288:288:288:288	263:263:263:263	290:290:290:296	350:353:356:356	209:209:212:212
207,	246:246:246:250	211:217:220:220	257:265:271:277	188:188:190:190	215:215:218:221	187:187:187:187	238:238:238:238	205:205:208:208	252:252:254:260	240:240:242:242	247:247:257:257	328:332:332:338	284:284:284:286	245:249:251:251	186:186:188:204	292:292:292:292	208:210:210:220	288:288:288:288	263:269:269:269	290:293:296:296	353:353:356:356	209:209:209:209
208,	246:246:246:250	214:217:217:217	257:259:259:271	188:188:188:190	206:212:215:224	187:187:187:190	238:238:238:238	208:208:208:208	256:260:264:264	234:236:236:242	261:261:261:261	332:332:336:338	284:286:286:286	249:249:251:251	186:186:186:190	292:292:292:292	208:210:210:210	288:288:288:288	248:248:263:263	296:296:296:296	347:353:353:356	209:209:212:218
209,	246:246:246:246	211:217:217:217	257:257:259:259	188:188:190:190	209:215:215:218	187:187:196:199	228:238:238:238	208:208:208:211	244:244:250:260	234:240:250:252	245:245:247:247	miss:miss:miss:miss	286:286:288:290	249:249:251:251	186:186:188:188	miss:miss:miss:miss	208:208:208:208	274:290:290:294	248:263:266:266	293:296:296:296	317:356:356:356	206:209:209:221
210,	242:246:248:254	211:217:217:217	259:259:263:271	188:188:190:190	215:215:218:218	187:187:187:187	228:232:238:238	205:208:208:208	250:250:250:262	236:238:240:242	239:245:247:261	332:332:332:332	284:284:284:284	249:249:251:251	186:186:186:188	296:296:296:296	208:208:210:210	288:290:290:302	263:263:266:266	293:296:296:305	341:341:353:356	206:209:209:212
211,	250:250:250:250	217:217:217:217	259:265:269:271	188:188:188:190	209:218:218:218	187:187:187:190	238:238:238:238	205:205:208:208	244:254:254:258	236:236:244:244	257:257:257:265	332:332:332:332	284:284:286:290	245:251:251:251	182:186:186:188	298:298:298:298	208:208:212:212	288:288:288:288	260:260:266:266	290:290:290:293	356:356:356:356	209:209:209:212
212,	246:250:250:250	217:217:217:217	259:259:259:271	188:190:190:190	215:215:215:218	187:187:187:199	226:234:234:238	205:205:208:208	252:252:252:264	234:240:240:250	239:239:253:253	miss:miss:miss:miss	284:286:288:290	245:251:251:255	184:186:186:186	292:292:292:292	208:208:210:210	miss:miss:miss:miss	248:266:266:266	290:296:296:302	341:353:356:356	209:209:212:212
213,	244:244:248:250	217:217:217:217	257:257:259:259	188:188:190:190	209:209:215:215	187:187:196:199	238:238:238:238	208:208:208:208	240:250:254:264	234:240:242:242	239:245:265:269	332:332:338:338	284:284:286:286	miss:miss:miss:miss	186:186:186:186	miss:miss:miss:miss	208:208:210:220	288:288:288:288	260:260:260:266	290:290:290:296	344:344:350:350	209:209:209:209
214,	246:246:246:246	211:217:217:217	257:257:259:259	188:188:190:190	215:215:218:218	187:187:190:199	238:238:238:246	205:205:205:208	244:244:252:266	242:244:244:246	245:245:245:267	332:332:332:332	284:284:286:286	miss:miss:miss:miss	190:190:192:192	296:298:298:298	208:208:208:208	288:288:288:288	263:263:278:278	296:296:296:302	350:356:356:359	209:209:209:212
215,	246:246:246:248	217:217:217:217	257:259:259:269	188:188:190:190	215:215:215:218	187:187:187:187	216:234:238:238	205:208:208:208	244:246:250:250	234:234:236:240	239:247:253:253	332:336:342:342	284:286:288:290	249:251:251:257	186:186:188:190	290:290:290:296	208:208:212:212	288:288:288:296	263:266:266:266	290:290:296:302	314:314:314:353	206:206:206:209
216,	242:250:250:250	211:217:217:226	259:265:271:275	188:188:188:188	215:215:215:215	187:187:187:187	234:234:234:234	205:205:208:208	240:244:244:250	234:234:240:250	239:239:245:245	332:332:338:338	284:284:286:286	245:249:251:251	186:186:186:190	miss:miss:miss:miss	208:208:210:210	282:288:288:290	248:248:266:266	290:290:296:296	317:350:353:356	209:209:209:212
217,	246:246:248:248	211:217:217:217	257:259:259:281	188:188:188:188	215:218:218:221	187:187:190:199	232:238:238:238	205:205:208:208	240:246:250:262	234:242:242:244	239:239:247:267	miss:miss:miss:miss	284:284:284:286	239:249:251:251	186:186:188:190	296:296:296:298	208:208:208:210	288:288:288:294	266:266:266:266	290:290:296:302	353:353:356:356	206:206:209:209
218,	246:246:250:250	217:217:220:220	259:259:265:269	188:188:190:190	209:215:218:218	187:187:187:199	228:230:238:246	205:205:208:208	244:252:252:260	234:240:242:250	239:239:247:253	miss:miss:miss:miss	284:284:286:286	245:249:251:251	186:186:188:190	292:292:298:298	208:208:210:210	288:288:288:288	263:263:266:266	296:296:296:296	317:317:356:356	206:206:209:212
219,	246:246:246:250	217:217:220:220	271:271:271:271	188:188:188:190	209:215:218:218	187:187:190:196	224:224:238:238	208:208:208:208	240:244:250:256	234:240:240:240	245:245:253:253	miss:miss:miss:miss	284:286:286:290	245:249:251:251	184:186:188:190	294:294:298:298	208:210:210:210	274:274:274:274	248:248:266:278	296:296:299:299	317:353:353:353	212:212:215:218
220,	242:246:246:250	217:217:226:226	259:265:271:275	188:188:190:190	215:215:218:218	187:187:187:199	234:238:238:238	205:205:208:208	240:244:250:258	234:236:240:250	239:239:245:245	332:332:332:332	284:284:284:286	245:249:249:251	186:186:186:186	296:296:296:296	208:208:210:210	288:288:290:290	248:248:248:248	290:290:296:296	350:353:356:356	209:209:209:212
221,	246:246:246:248	217:217:220:220	259:259:259:269	188:188:190:190	215:215:218:224	187:187:190:190	234:234:238:238	208:208:208:208	244:244:246:260	232:240:244:248	243:247:253:261	332:332:332:332	284:286:290:292	239:249:251:251	186:186:186:190	292:292:292:296	210:210:210:210	290:290:300:300	248:263:266:266	293:296:296:296	353:356:356:356	209:212:212:215
222,	246:246:250:262	211:217:217:220	257:259:259:269	188:188:188:190	209:215:215:218	187:187:187:187	224:238:238:238	205:205:208:208	240:244:250:262	232:240:250:256	239:239:239:239	328:332:332:332	284:284:286:288	241:251:251:251	186:186:186:186	292:292:294:294	208:210:210:216	288:288:288:296	263:263:281:281	296:296:296:296	350:356:356:356	209:209:209:209
223,	242:246:246:248	217:220:220:220	265:269:271:271	188:188:188:190	215:215:215:218	187:187:193:199	miss:miss:miss:miss	205:205:208:208	244:244:254:264	234:240:242:246	253:253:261:261	332:332:336:338	284:284:284:286	249:249:251:251	186:186:186:192	292:294:294:296	210:210:210:216	288:288:288:288	263:263:266:266	290:290:296:296	317:350:353:356	209:212:212:218
224,	246:246:246:250	211:211:217:220	259:259:265:265	188:188:190:190	209:215:215:218	187:187:187:187	226:238:238:238	208:208:208:208	240:244:244:258	236:236:242:242	245:245:253:253	332:340:340:344	284:286:286:290	245:249:251:251	186:186:186:186	292:292:292:292	208:208:208:208	274:288:288:294	248:248:266:272	miss:miss:miss:miss	332:350:353:356	206:212:212:212
225,	242:246:246:248	217:217:220:226	259:265:265:271	188:188:188:190	215:215:215:218	187:187:187:199	216:228:238:246	205:208:208:208	244:244:244:264	232:240:242:246	255:255:257:257	336:336:336:336	284:284:286:286	miss:miss:miss:miss	186:186:186:188	292:292:292:298	miss:miss:miss:miss	miss:miss:miss:miss	miss:miss:miss:miss	290:290:296:296	317:347:353:356	209:212:212:212
226,	244:246:246:246	211:217:217:220	265:265:271:271	188:188:188:190	215:215:215:218	miss:miss:miss:miss	226:238:238:238	208:208:208:208	240:244:244:254	242:242:242:242	245:253:253:253	332:340:340:340	284:286:286:290	245:245:249:249	186:186:186:186	292:292:294:294	208:208:208:212	274:274:274:294	266:266:272:281	290:290:296:296	317:353:353:356	206:206:209:212
227,	246:246:246:246	217:217:217:217	259:259:271:271	188:190:190:190	209:218:218:218	187:187:190:190	miss:miss:miss:miss	205:205:208:208	244:244:250:260	234:234:240:244	239:239:243:243	332:336:344:344	284:284:286:288	251:251:251:251	186:186:192:192	miss:miss:miss:miss	208:208:210:210	miss:miss:miss:miss	263:263:263:266	296:296:296:296	353:353:353:356	206:206:215:218
pop 9
228,	246:246:248:252	217:217:217:220	259:259:259:271	188:188:188:190	209:209:215:215	187:190:199:199	230:234:238:238	205:208:208:208	244:244:244:262	240:244:244:244	243:243:263:263	334:336:338:338	284:286:286:288	249:249:249:251	186:186:186:186	296:296:296:296	208:208:208:210	288:288:288:294	263:263:263:263	290:293:296:296	356:356:356:356	206:209:212:212
229,	242:246:250:252	217:217:217:217	259:259:259:273	188:188:188:190	218:218:218:221	187:187:190:199	216:228:228:228	208:208:208:208	254:258:266:268	240:240:242:244	245:253:253:261	332:332:332:336	284:284:286:288	241:245:251:251	186:186:186:190	294:294:294:294	208:208:210:210	276:288:288:288	263:266:266:266	290:290:296:296	350:356:356:356	209:209:209:212
230,	246:250:252:252	211:217:217:217	257:263:263:265	188:188:188:190	215:218:218:221	187:187:190:199	238:238:238:238	208:208:208:208	240:244:250:272	238:242:242:244	245:245:263:263	332:332:336:336	284:284:288:292	245:245:251:251	186:186:186:190	292:292:292:292	208:208:208:210	272:288:288:298	263:266:266:266	290:290:290:296	332:350:353:359	206:209:209:209
231,	244:246:246:252	211:217:217:220	259:259:267:271	188:188:188:190	206:215:215:218	187:187:187:190	224:238:238:238	205:208:208:208	244:244:248:256	238:238:240:240	245:245:263:263	330:336:336:336	284:286:288:290	251:251:251:253	186:186:186:186	292:292:292:292	208:208:208:208	288:288:288:290	248:248:248:263	290:290:296:302	332:353:353:356	209:209:212:212
232,	244:246:246:252	211:217:217:220	259:259:267:271	188:190:190:190	206:215:215:218	187:187:187:190	224:238:238:238	205:208:208:208	246:246:248:256	238:238:240:240	245:245:263:263	336:336:336:336	284:286:288:290	249:251:251:253	186:186:186:186	292:292:292:292	208:208:208:208	288:288:288:290	248:248:248:263	290:290:296:302	332:353:353:356	209:209:212:212
233,	246:246:246:250	211:211:217:217	259:259:259:265	188:188:188:190	212:215:215:218	187:187:187:187	226:228:228:238	205:205:205:208	miss:miss:miss:miss	244:246:256:258	247:255:255:263	336:336:336:336	286:286:286:286	245:249:249:253	184:186:186:194	296:296:296:296	208:208:208:214	288:288:288:296	263:263:266:266	290:293:293:296	350:353:356:356	209:209:212:221
234,	244:246:246:258	217:217:217:220	257:259:259:267	188:188:190:190	215:218:221:221	187:187:199:199	238:238:238:238	205:205:205:208	246:246:252:256	240:246:246:246	245:245:245:253	332:334:336:338	284:284:286:286	249:251:251:251	184:188:190:204	292:292:292:296	208:208:208:210	288:288:288:296	248:248:266:278	290:296:296:302	347:350:356:356	209:209:209:209
235,	242:246:250:254	211:217:217:220	257:259:259:269	188:188:188:188	218:218:218:218	187:187:190:199	238:238:238:238	208:208:208:211	244:250:256:258	234:238:240:240	243:243:261:263	336:336:336:338	284:284:286:286	247:249:251:251	184:184:186:186	294:294:296:296	208:208:208:212	288:288:288:288	248:260:263:266	290:290:290:296	353:356:356:359	206:206:212:218
236,	246:246:246:252	217:217:217:217	257:257:257:259	188:188:188:190	215:218:218:218	187:187:187:199	228:234:238:238	205:205:208:208	244:244:250:254	240:240:242:244	243:253:253:263	330:332:332:338	284:284:286:286	245:251:251:253	186:186:188:190	296:296:296:296	208:208:208:210	290:290:300:300	266:272:272:272	290:293:296:296	344:350:353:353	209:209:212:212
237,	246:246:250:252	217:217:217:220	257:257:257:265	188:188:188:190	209:212:215:215	187:187:187:199	234:238:238:246	208:208:208:208	miss:miss:miss:miss	236:236:240:244	259:261:263:263	334:334:336:336	284:286:286:290	249:251:251:263	184:186:186:186	292:304:304:304	208:208:208:214	288:288:288:288	248:248:272:272	293:293:296:296	350:350:353:356	209:209:209:212
238,	246:246:248:252	217:217:217:217	259:259:259:271	188:188:188:188	209:215:215:215	187:187:190:199	234:238:238:238	205:208:208:208	244:244:256:266	234:234:240:244	247:257:257:263	334:334:338:338	286:286:286:288	249:249:251:251	186:186:186:190	292:292:292:292	208:208:208:208	288:288:288:288	248:257:263:263	293:296:296:296	347:353:356:356	206:209:212:212
239,	242:246:250:254	211:217:217:220	257:259:259:269	188:188:188:188	218:218:218:218	187:187:190:199	238:238:238:238	208:208:208:211	244:246:250:256	234:238:240:240	miss:miss:miss:miss	336:336:336:338	284:284:286:286	247:249:251:251	184:184:186:186	294:294:296:296	208:208:208:208	288:288:288:288	248:260:263:266	290:290:290:296	353:356:356:359	206:206:212:218
240,	246:246:248:252	217:217:217:220	259:259:259:271	188:188:188:190	209:209:215:215	187:190:199:199	228:234:238:238	205:208:208:208	244:244:244:262	240:244:244:244	243:243:263:263	334:336:338:338	286:286:286:288	249:249:249:251	186:186:186:186	296:296:296:296	208:208:208:210	288:288:288:296	263:263:263:263	290:293:296:296	356:356:356:356	206:209:212:212
241,	244:246:246:252	211:217:217:220	259:259:267:271	188:188:188:190	206:215:215:218	178:187:187:199	226:238:238:238	205:208:208:208	244:244:248:256	238:238:240:240	245:245:263:263	336:336:336:338	284:286:288:290	251:251:253:255	186:186:186:186	292:292:292:292	208:208:208:208	288:288:288:290	248:248:248:263	290:290:296:302	332:353:353:356	209:209:212:212
242,	246:246:250:252	217:217:217:220	257:259:259:265	188:188:188:190	209:212:215:215	187:187:187:199	234:234:238:246	208:208:208:208	246:246:256:258	236:240:242:244	259:261:263:263	334:334:336:336	284:286:286:290	251:251:257:263	184:186:186:186	292:304:304:304	208:208:208:214	miss:miss:miss:miss	248:248:272:272	293:293:296:296	350:353:356:356	209:209:212:218
243,	246:250:252:252	211:217:217:217	257:263:263:265	188:188:188:190	215:218:218:221	187:187:190:199	238:238:238:238	208:208:208:208	240:244:250:272	238:242:242:244	245:245:263:263	332:334:336:336	284:284:288:292	245:245:251:251	186:186:186:190	292:292:292:292	208:208:208:210	miss:miss:miss:miss	248:263:266:266	290:290:290:296	332:350:353:356	206:209:209:209
244,	246:246:250:262	211:217:217:226	259:259:263:271	188:188:190:190	215:218:227:227	187:187:187:190	228:230:238:238	205:208:208:208	244:244:246:262	244:244:246:248	245:253:255:263	332:332:334:344	284:286:286:286	249:251:253:259	186:188:192:192	292:292:294:294	208:208:208:212	290:290:290:298	248:263:272:278	290:296:296:296	353:353:353:353	212:212:212:218
245,	246:246:248:250	217:217:220:226	257:259:271:275	188:188:188:190	215:215:215:221	187:187:187:199	238:238:238:238	205:205:205:208	250:254:258:266	240:240:244:250	239:245:253:253	332:332:334:334	284:284:286:286	249:251:251:251	186:186:186:190	294:294:294:294	208:208:210:210	288:288:288:288	miss:miss:miss:miss	290:293:296:296	353:356:356:356	209:212:212:212
246,	246:246:252:252	211:217:217:217	259:259:259:271	188:188:190:190	209:215:218:221	187:187:187:187	238:238:246:246	205:208:208:208	244:244:244:256	234:236:236:246	243:243:263:263	332:332:332:332	284:284:286:288	249:251:251:251	184:186:188:188	292:292:292:292	208:208:208:212	288:290:290:290	260:263:263:272	290:290:293:296	353:356:356:356	206:209:212:218
247,	244:246:246:252	211:217:217:220	259:259:267:271	188:188:188:190	206:215:215:218	187:187:187:190	226:238:238:238	205:208:208:208	244:244:248:256	238:238:240:240	245:245:263:263	336:336:336:338	284:286:288:290	249:251:251:253	186:186:186:186	292:292:292:292	208:208:208:208	288:288:288:290	248:248:248:263	290:290:296:302	332:353:353:356	209:209:212:212
248,	242:246:250:252	217:217:217:217	259:259:259:273	188:188:188:190	218:218:218:221	187:187:190:199	216:226:228:228	208:208:208:208	254:258:262:268	240:240:242:244	245:253:253:261	332:332:332:336	284:284:286:288	241:245:251:251	186:186:186:190	294:294:294:294	208:208:210:210	276:288:288:288	263:266:266:266	290:290:296:296	350:356:356:356	209:209:209:212
249,	246:246:246:252	217:217:220:220	271:271:271:271	188:188:188:190	209:215:218:218	187:187:199:196	224:226:238:238	208:208:208:208	240:244:250:256	238:240:240:240	245:245:253:253	332:334:334:336	284:286:286:290	245:249:251:251	184:186:188:190	294:294:298:298	208:210:210:210	272:272:272:272	248:248:266:278	296:296:299:299	317:353:353:353	212:212:215:218
250,	miss:miss:miss:miss	217:217:217:226	257:257:257:259	188:188:188:188	209:209:215:215	187:187:190:196	238:238:238:238	205:208:208:208	244:244:250:254	232:240:240:244	239:253:263:265	334:334:334:334	284:284:286:292	249:251:251:251	186:186:186:194	292:292:298:298	208:208:208:212	miss:miss:miss:miss	248:248:266:266	290:296:296:299	miss:miss:miss:miss	206:206:209:209
251,	246:246:246:262	211:217:217:217	259:259:265:271	188:188:190:190	218:218:218:227	187:187:187:190	228:230:230:238	205:208:208:208	244:244:246:256	240:240:242:248	245:247:255:257	miss:miss:miss:miss	286:286:286:286	241:251:251:251	186:186:188:190	292:292:294:294	208:208:212:216	282:288:288:290	248:248:263:269	296:296:296:296	347:353:353:356	209:212:212:218
252,	246:252:246:246	220:220:217:217	271:271:259:259	188:190:188:188	218:218:209:209	199:196:187:190	238:238:230:234	208:208:205:208	250:256:244:244	240:240:240:242	253:253:243:243	334:336:334:336	286:290:286:286	251:251:249:249	188:190:186:186	298:298:296:296	210:210:208:208	272:272:288:288	266:278:263:263	299:299:290:293	353:353:356:356	215:218:206:209
253,	244:246:246:258	217:217:217:220	257:259:259:267	188:188:190:190	215:218:221:221	187:190:190:190	238:238:238:238	205:205:205:208	246:246:252:256	240:244:246:246	245:245:245:253	332:334:336:338	284:284:286:286	249:251:251:251	184:188:190:204	292:292:292:296	208:208:208:210	288:288:288:296	248:248:266:278	290:296:296:302	347:350:356:356	209:209:209:209
254,	246:246:248:252	217:217:217:220	259:259:259:271	188:188:188:190	209:209:215:215	187:190:199:199	230:234:238:238	205:208:208:208	244:244:244:262	240:242:244:244	243:243:263:263	334:336:338:338	286:286:286:288	249:249:251:251	186:186:186:186	296:296:296:296	208:208:208:210	288:288:288:288	263:263:263:263	290:293:296:296	356:356:356:356	206:209:212:212
255,	246:248:250:252	217:217:217:226	259:259:269:269	188:188:190:190	209:209:215:215	187:187:187:190	216:228:238:246	205:205:208:208	miss:miss:miss:miss	240:242:242:242	259:259:265:265	334:336:338:338	284:284:284:286	249:249:251:253	186:186:186:186	296:296:296:296	208:208:208:210	288:288:288:288	266:266:266:266	290:290:290:296	332:353:353:356	209:209:212:212
256,	246:250:252:262	217:217:220:220	259:263:271:271	188:188:188:190	209:215:215:215	187:187:187:199	238:238:238:238	208:208:208:211	240:258:258:260	240:240:240:248	245:245:247:253	334:334:334:336	284:284:286:292	251:251:251:251	186:186:188:190	miss:miss:miss:miss	208:208:210:216	288:288:288:288	248:263:263:266	290:296:296:296	350:350:353:356	206:206:212:218
pop 10
257,	246:246:246:246	211:211:217:220	265:269:269:275	188:188:188:190	209:215:218:218	187:187:187:187	228:238:238:238	205:205:208:211	240:244:246:260	234:240:242:248	245:245:253:253	332:338:338:342	284:284:286:286	245:251:251:263	186:186:190:190	292:292:296:296	208:208:210:210	288:288:288:288	263:263:272:272	293:293:296:296	317:353:353:356	209:209:209:212
258,	242:246:248:250	217:217:217:217	259:259:259:259	188:188:190:190	209:215:215:218	187:187:187:187	238:238:238:238	208:208:208:208	244:246:250:260	234:234:236:240	245:255:261:261	332:332:332:332	284:284:286:288	245:251:251:251	184:186:190:192	292:292:294:294	208:208:210:210	miss:miss:miss:miss	263:263:266:275	290:293:296:299	317:353:356:356	209:209:212:212
259,	246:250:250:250	211:211:217:217	257:259:271:271	188:188:190:190	215:215:215:221	187:187:187:193	224:238:238:238	205:205:205:208	244:244:254:260	234:240:240:242	245:247:253:261	330:338:338:344	284:284:284:286	245:251:251:251	186:186:186:190	292:292:294:294	208:208:208:208	288:288:288:288	263:266:266:266	290:293:296:296	353:353:353:356	206:209:209:212
260,	246:246:246:262	217:217:217:220	257:259:259:265	188:188:188:190	209:215:218:218	187:187:190:190	238:238:238:238	205:205:208:208	244:250:260:262	240:240:242:248	245:245:247:261	332:338:338:338	286:286:286:286	245:251:251:251	184:186:188:190	miss:miss:miss:miss	208:208:210:210	304:304:304:304	248:266:266:275	290:290:293:296	317:353:356:356	206:212:212:212
261,	246:246:246:246	211:220:220:226	259:259:259:271	188:188:190:190	215:215:215:215	187:187:187:187	238:238:238:238	205:208:208:208	240:242:244:256	236:240:244:244	247:253:257:261	330:330:336:336	286:286:286:292	249:251:251:251	186:188:188:188	292:296:296:296	208:208:208:210	288:288:288:288	257:257:266:266	290:290:293:296	350:353:353:356	miss:miss:miss:miss
262,	246:246:250:250	211:211:217:217	259:259:259:259	188:188:190:190	215:215:215:218	187:187:196:199	232:238:238:238	208:208:208:211	244:244:244:254	234:240:240:240	253:253:261:261	334:336:336:338	284:284:284:286	249:249:251:263	186:186:186:186	292:292:294:294	208:210:212:220	288:288:296:298	260:263:263:263	290:296:296:302	317:353:356:356	miss:miss:miss:miss
263,	246:246:246:246	211:211:217:226	259:259:269:271	188:188:190:190	215:215:218:218	187:187:187:190	228:228:238:238	208:208:208:208	244:248:252:260	234:240:242:242	239:239:245:253	332:334:344:344	284:284:286:292	245:251:251:253	184:184:186:190	292:292:294:298	208:208:210:210	288:288:288:288	248:248:266:266	290:290:290:293	353:353:356:356	209:209:212:212
264,	240:246:246:246	211:217:220:220	259:259:259:265	188:188:190:190	215:215:215:215	187:187:187:199	224:238:238:238	205:205:208:208	240:250:250:266	240:240:240:244	239:239:255:261	332:338:338:338	284:286:286:288	249:249:251:251	182:182:186:186	miss:miss:miss:miss	208:208:208:208	274:274:290:290	257:260:263:272	290:290:290:296	350:353:353:356	209:209:212:212
265,	246:246:248:250	217:217:220:226	259:259:259:271	188:188:188:190	209:218:218:218	187:187:190:196	234:238:238:238	205:205:205:205	244:252:252:256	240:242:242:248	239:239:255:255	332:332:332:332	284:286:286:290	245:249:251:251	184:186:186:190	296:296:298:298	208:208:210:216	288:288:288:296	263:266:269:269	290:290:296:296	344:344:350:356	209:209:212:212
266,	246:246:250:250	211:217:217:220	257:257:259:259	188:188:188:190	215:215:218:218	187:187:187:187	228:228:238:238	208:208:208:208	244:258:258:268	234:234:240:244	245:249:253:261	332:332:332:332	284:286:286:290	249:251:251:251	186:186:190:190	292:296:296:298	208:208:208:216	276:284:288:288	263:263:263:263	293:296:296:296	350:350:350:356	209:209:212:212
267,	244:246:246:246	211:211:217:217	259:265:269:271	190:190:190:190	209:212:215:215	187:187:187:199	222:232:238:238	205:205:205:208	240:244:250:264	234:240:240:244	239:247:253:261	332:334:336:338	284:286:286:292	245:249:251:251	182:186:186:204	miss:miss:miss:miss	208:208:210:218	274:288:288:296	263:263:266:266	290:290:290:296	miss:miss:miss:miss	209:215:215:215
268,	246:246:250:250	211:211:217:217	257:259:259:271	188:188:188:190	215:218:218:218	187:187:187:187	228:230:230:238	208:208:208:208	244:256:258:268	234:234:240:244	243:243:247:253	332:332:332:332	284:286:286:286	245:249:251:251	186:186:186:186	296:296:296:296	208:208:208:212	274:288:288:288	263:266:266:272	290:290:296:296	344:344:350:353	206:209:212:218
269,	242:246:250:262	217:217:220:220	257:259:259:259	188:188:190:190	215:215:215:221	187:187:199:199	222:234:234:238	208:208:208:208	244:244:244:244	234:240:242:242	239:239:247:253	332:332:332:338	284:284:284:290	249:251:251:253	186:186:186:190	292:292:292:292	208:208:210:210	274:288:288:294	266:266:266:266	290:296:296:296	332:350:356:359	212:212:212:212
270,	248:248:262:262	217:217:220:226	259:259:267:267	188:188:190:198	215:215:215:218	187:187:190:199	238:238:238:238	205:205:208:208	244:250:252:254	234:234:240:240	245:245:245:245	328:332:332:334	284:284:284:286	249:249:251:251	186:186:186:186	294:294:296:296	208:208:214:218	288:288:290:294	248:248:248:266	290:296:296:296	317:353:353:356	209:209:209:221
271,	242:244:246:248	211:211:211:217	257:259:265:265	188:188:188:190	209:215:218:221	187:187:187:187	miss:miss:miss:miss	208:208:208:208	240:240:250:258	234:234:242:242	239:239:239:261	332:332:338:338	284:286:288:292	251:251:251:251	184:188:188:192	miss:miss:miss:miss	208:210:210:218	288:288:288:288	263:263:263:278	296:296:296:302	341:353:353:356	206:206:212:212
272,	242:242:246:254	211:217:217:217	259:259:259:277	188:188:190:190	215:215:215:218	187:187:190:199	224:224:224:224	208:208:208:208	244:244:254:258	236:236:240:240	243:253:253:261	332:332:332:336	284:284:284:288	245:249:251:261	186:186:186:188	miss:miss:miss:miss	208:208:212:212	288:288:294:294	263:263:266:281	290:296:296:302	353:356:356:356	209:212:212:218
273,	244:244:246:246	211:217:217:220	259:259:271:271	188:188:188:188	209:215:218:218	187:187:187:190	232:238:238:238	205:208:208:208	250:250:258:264	234:242:244:246	239:247:261:261	328:332:332:338	284:286:286:288	245:251:255:259	186:186:186:186	292:292:292:298	208:208:208:212	288:288:288:288	248:263:263:272	290:293:296:296	350:350:353:356	206:206:212:212
274,	246:250:250:250	217:217:220:220	257:259:265:269	188:188:188:190	209:212:215:218	187:187:187:190	232:232:246:246	208:208:208:208	244:250:254:264	234:236:242:244	255:257:257:261	332:332:336:336	284:286:286:286	245:249:251:251	186:186:186:190	292:292:304:304	208:208:208:214	miss:miss:miss:miss	257:257:257:257	293:293:296:296	353:353:353:356	209:209:209:209
275,	246:246:248:250	211:217:217:220	257:259:265:269	188:188:190:198	218:218:218:218	187:187:187:187	216:234:234:238	205:205:208:208	244:258:264:266	234:236:242:242	239:245:247:253	332:332:332:338	284:284:286:290	249:249:251:251	186:190:190:192	296:296:298:298	208:210:210:220	288:288:288:290	263:263:263:263	290:296:296:299	350:353:356:356	209:209:209:209
276,	246:250:252:262	211:211:217:217	259:259:259:271	188:190:190:190	215:218:218:218	187:187:187:187	238:238:238:238	205:208:208:208	244:244:254:256	240:240:244:244	247:247:247:253	332:332:332:338	284:286:286:286	249:251:253:255	184:186:188:192	296:296:298:298	208:208:210:218	288:290:290:300	248:248:263:266	290:296:296:296	332:353:356:356	209:209:209:221
277,	246:246:246:246	217:217:220:220	257:259:259:267	188:188:190:190	209:215:215:218	187:190:199:199	238:238:238:238	205:208:208:208	244:256:258:258	240:240:248:254	239:239:245:261	332:332:332:332	284:286:286:286	245:249:251:255	186:186:190:192	292:292:294:294	208:210:210:210	288:288:288:288	269:269:272:272	296:296:296:299	317:347:350:353	206:209:212:212
278,	246:246:246:246	211:217:220:220	259:259:259:265	188:188:190:190	209:209:215:218	187:187:199:199	228:228:234:238	205:208:208:208	244:244:246:256	236:236:240:240	miss:miss:miss:miss	miss:miss:miss:miss	284:284:286:292	249:251:251:255	184:188:190:204	292:292:292:292	208:208:210:210	288:288:294:302	260:260:266:278	290:290:296:296	317:332:344:356	206:209:212:212
279,	246:246:246:246	211:217:217:217	259:259:265:271	188:190:190:190	209:209:215:215	187:187:190:199	228:230:234:238	205:208:208:208	244:252:252:264	234:240:242:246	247:247:255:255	332:332:332:332	284:284:286:286	251:251:251:251	186:186:188:190	296:296:296:296	208:210:214:216	288:288:288:288	263:263:263:272	290:296:296:296	353:356:356:356	206:209:209:212
280,	246:246:246:246	211:217:220:220	259:259:259:265	188:188:190:190	209:209:215:218	187:187:199:199	228:234:234:238	205:208:208:208	244:244:246:256	236:236:240:240	247:247:261:261	332:332:332:338	284:284:286:292	249:251:251:255	184:188:190:204	292:292:292:292	208:208:210:210	288:288:294:302	260:260:266:278	290:290:296:296	317:332:344:356	206:209:212:212
281,	246:246:246:248	217:217:220:226	257:259:265:269	188:188:188:190	209:209:215:215	187:187:187:187	238:238:238:238	208:208:208:211	244:250:252:254	234:240:246:248	miss:miss:miss:miss	miss:miss:miss:miss	284:284:286:288	245:251:251:251	186:186:186:186	296:296:304:304	208:208:208:210	290:290:290:290	266:266:278:278	290:290:296:296	356:356:356:356	209:209:209:212
282,	246:246:246:246	217:217:217:217	257:259:259:269	188:188:188:190	209:215:218:224	187:196:199:199	238:238:238:238	205:208:208:208	244:244:252:252	240:244:244:248	247:253:253:261	328:332:332:338	284:286:286:286	miss:miss:miss:miss	186:186:186:190	292:292:304:304	208:208:208:208	274:288:288:288	248:248:263:263	296:296:296:296	353:356:356:356	209:212:212:215
283,	250:250:250:250	217:217:217:220	257:257:259:259	188:188:188:190	209:209:209:218	187:187:187:196	238:238:238:238	208:208:208:208	240:244:252:258	232:240:240:250	239:239:245:245	328:332:332:332	284:286:286:286	249:249:251:255	186:188:190:190	294:294:294:294	208:208:208:208	274:288:288:288	248:248:263:263	290:290:290:296	332:350:350:350	206:209:209:212
284,	246:246:246:262	211:211:220:220	259:265:265:265	188:188:188:190	209:209:215:218	187:187:190:199	238:238:238:238	205:205:208:208	254:256:256:258	234:234:240:240	249:249:253:253	332:334:336:338	284:284:286:290	249:249:251:251	186:186:190:190	294:294:296:296	208:208:212:216	miss:miss:miss:miss	248:248:263:266	290:296:296:296	350:350:353:356	209:212:212:212
285,	246:246:248:262	217:217:220:226	257:259:265:269	188:188:188:190	209:209:215:215	187:187:187:187	238:238:238:238	208:208:211:211	244:250:252:254	234:240:246:248	253:261:261:263	328:332:338:338	284:284:286:288	245:251:251:251	186:186:186:188	296:296:304:304	208:208:208:210	290:290:290:290	266:266:278:278	290:290:296:296	356:356:356:356	209:209:209:212
286,	246:246:246:246	217:217:217:220	miss:miss:miss:miss	188:188:190:190	215:215:215:215	187:187:187:199	238:238:238:238	208:208:208:208	244:248:254:264	240:240:244:246	261:261:261:267	330:330:332:336	284:284:284:290	245:251:251:251	184:186:186:190	miss:miss:miss:miss	208:208:208:208	274:284:290:296	248:257:257:269	290:290:296:296	350:356:356:356	206:206:209:209
287,	246:246:246:246	211:217:217:220	miss:miss:miss:miss	188:188:190:190	215:215:215:215	187:187:187:187	238:238:238:246	205:208:208:208	250:250:252:258	238:238:240:240	239:239:239:261	330:330:330:338	284:284:284:286	245:251:251:255	186:186:186:186	294:294:294:294	208:208:210:210	288:288:294:302	260:263:266:266	290:290:290:296	353:353:356:356	212:212:212:212
288,	246:246:250:250	211:217:217:217	miss:miss:miss:miss	188:188:190:190	215:215:218:218	187:187:187:190	226:234:238:238	205:205:208:208	240:258:260:264	234:244:244:248	239:239:255:261	330:330:332:338	284:284:286:288	249:249:251:251	184:186:188:188	292:292:294:294	210:210:210:210	288:290:290:296	248:248:263:263	290:296:296:296	317:317:317:356	209:209:212:212
pop 11
289,	246:246:252:254	217:217:217:217	257:259:259:259	188:188:190:190	212:215:215:224	187:187:187:187	226:238:238:238	205:208:208:208	246:246:250:250	236:246:246:246	243:245:253:253	332:334:334:338	284:288:288:290	249:249:249:249	186:186:186:186	298:298:298:298	206:208:208:212	288:288:288:294	248:263:266:266	290:290:296:296	317:317:353:356	206:209:212:218
290,	246:252:252:262	211:211:211:217	257:257:257:259	188:188:188:190	209:215:215:215	187:187:187:190	236:238:238:238	205:208:208:208	244:244:252:254	232:234:240:242	239:243:249:253	332:334:336:336	284:284:286:286	249:251:251:251	186:186:188:190	294:294:294:294	208:208:208:210	miss:miss:miss:miss	248:263:263:263	290:296:296:299	353:356:356:356	206:209:209:218
291,	246:248:248:250	211:217:217:220	259:259:259:259	188:190:190:190	215:215:215:221	187:187:196:199	220:222:228:238	208:208:208:208	250:250:258:262	240:240:246:246	263:263:263:263	334:338:338:338	284:284:286:286	245:249:251:251	186:186:190:192	292:292:294:298	208:210:212:212	288:288:290:296	248:260:266:266	290:290:290:293	353:356:356:356	209:209:209:212
292,	250:250:250:250	211:211:217:220	261:265:267:271	188:188:188:190	209:215:215:218	187:187:187:187	234:238:238:238	205:208:208:208	244:244:250:250	232:232:244:244	243:243:247:247	330:332:334:336	284:284:284:292	249:249:251:251	184:186:186:190	292:292:296:296	208:208:210:210	294:294:296:296	248:248:260:260	290:290:293:296	317:356:356:359	209:218:218:218
293,	244:246:252:254	217:217:217:217	259:259:271:273	188:188:188:190	215:215:218:218	187:187:187:190	238:238:238:238	205:205:205:208	244:246:250:254	244:244:250:250	253:257:261:263	334:336:336:338	284:286:286:290	249:249:257:263	186:186:186:186	296:296:296:296	208:210:210:210	296:296:296:296	248:248:248:269	293:293:296:296	350:353:353:353	209:209:212:212
294,	244:246:246:250	217:217:217:220	259:259:273:275	188:188:190:190	209:212:218:221	187:187:190:190	238:238:238:238	205:205:208:208	244:250:250:252	250:242:242:250	247:255:255:263	332:334:336:342	284:286:286:286	249:251:251:253	186:186:186:190	miss:miss:miss:miss	208:210:210:210	288:288:288:288	272:272:275:275	296:296:296:296	350:350:353:356	206:212:212:212
295,	242:246:246:250	217:217:217:217	257:259:259:259	188:188:190:190	209:215:215:224	187:187:187:187	222:230:234:234	205:205:208:208	miss:miss:miss:miss	242:242:242:244	245:245:247:253	332:334:334:336	284:284:284:286	241:249:253:253	182:182:186:186	292:292:294:294	208:208:208:210	288:288:288:288	248:248:263:263	290:290:290:296	353:356:356:356	206:209:212:212
296,	242:246:248:250	217:217:217:217	257:271:271:275	188:188:190:190	209:215:215:218	187:187:187:190	226:228:234:234	205:208:208:208	242:250:254:258	236:236:244:252	253:253:257:257	330:332:332:338	284:286:286:290	245:249:251:251	186:186:186:190	294:294:294:294	208:208:208:210	288:288:288:294	266:266:272:275	290:293:296:296	350:350:353:356	206:209:215:221
297,	248:250:250:262	217:217:217:220	259:259:263:271	188:188:190:190	209:209:215:215	187:187:199:199	222:224:238:240	205:208:208:208	244:250:256:256	234:242:244:244	245:253:253:253	334:334:334:334	284:284:284:290	249:249:251:251	186:186:186:186	292:292:292:292	208:208:210:214	288:288:288:296	248:266:269:269	293:293:296:296	350:353:353:353	209:209:209:209
298,	246:246:250:252	211:217:217:220	259:269:271:271	188:188:188:190	215:215:218:218	187:187:190:196	234:238:238:246	208:208:208:208	240:250:254:256	232:238:240:240	247:247:253:257	338:338:338:344	284:284:286:286	245:249:251:251	186:186:188:190	292:294:294:294	208:208:208:216	288:288:296:298	248:248:266:272	290:290:293:296	353:356:356:356	209:209:209:215
299,	244:246:250:254	217:217:217:220	259:259:265:265	188:188:188:190	209:215:215:215	187:187:187:199	234:234:238:238	205:208:208:208	244:246:250:252	236:236:236:244	245:245:247:263	334:334:334:334	284:284:284:286	245:249:251:251	186:186:188:190	miss:miss:miss:miss	206:208:212:212	284:284:292:292	263:263:269:269	290:290:296:296	350:350:353:353	209:209:212:212
300,	244:246:252:254	211:217:217:220	265:265:267:271	188:188:188:190	215:215:218:218	187:187:187:199	236:236:238:238	205:205:208:208	244:250:254:264	236:236:240:240	239:239:239:239	334:334:336:338	284:284:284:284	249:249:249:251	186:186:186:192	294:294:296:296	208:208:210:210	288:288:288:288	266:266:269:269	290:290:296:299	350:356:356:356	206:212:212:218
301,	244:246:246:262	217:217:217:217	257:259:259:265	188:188:190:190	209:218:218:221	187:187:187:187	226:234:238:238	205:208:208:208	240:244:244:258	242:242:244:244	243:245:245:263	334:336:338:338	284:284:286:288	245:249:249:251	186:186:188:190	292:292:292:292	208:208:210:210	miss:miss:miss:miss	263:263:266:266	290:290:296:296	317:344:350:350	209:212:215:218
302,	246:246:246:250	211:217:217:220	259:259:259:265	188:188:188:190	209:212:215:218	187:187:187:187	228:234:234:238	205:208:208:208	246:246:256:256	240:242:248:250	245:245:247:253	332:334:338:338	284:284:286:286	245:247:251:251	186:186:186:186	292:294:294:296	208:210:210:210	288:288:290:290	248:263:266:266	290:290:296:302	341:350:356:356	206:209:212:221
303,	244:246:246:250	217:217:217:217	miss:miss:miss:miss	188:188:190:190	209:215:215:218	187:187:187:187	238:238:238:246	205:205:208:208	240:246:252:256	240:248:250:250	245:247:253:263	332:332:334:338	284:286:286:288	249:249:249:251	188:190:192:194	296:296:296:296	210:210:210:212	276:288:288:292	263:263:263:266	293:296:296:296	344:353:353:356	206:209:209:212
304,	246:246:250:252	211:217:220:223	257:259:271:271	188:188:188:188	209:215:218:218	178:187:187:199	224:230:238:246	205:208:208:211	240:240:250:256	234:240:240:242	247:257:259:261	338:338:338:344	284:284:286:290	245:249:251:251	186:196:186:194	296:296:296:296	208:208:210:212	288:288:288:296	miss:miss:miss:miss	290:290:296:299	344:353:356:356	206:209:209:209
305,	242:246:250:262	211:217:217:220	257:257:259:265	188:188:188:190	209:215:215:218	187:187:187:187	226:238:238:238	205:205:208:208	240:258:262:264	232:232:234:236	243:247:253:255	334:334:336:336	286:286:286:290	249:251:251:251	186:186:186:188	miss:miss:miss:miss	208:208:210:210	290:290:290:290	248:260:263:263	290:290:290:296	353:353:356:356	209:209:212:212
306,	246:248:250:262	211:217:217:226	259:259:259:259	188:188:188:188	209:215:215:221	187:187:187:187	226:228:230:234	205:208:208:208	240:254:254:260	240:240:244:244	253:253:263:263	334:334:334:338	284:286:288:290	245:245:249:249	186:188:190:192	294:294:296:296	210:210:212:214	284:286:286:288	263:266:266:266	290:290:296:302	350:350:350:356	209:209:209:212
307,	242:246:246:246	217:217:217:217	259:259:269:271	188:188:188:190	209:215:218:218	187:187:187:190	228:238:238:238	205:205:205:208	244:244:244:250	240:242:246:248	245:245:263:263	334:334:334:338	284:286:286:290	245:249:251:257	186:186:186:186	292:292:292:292	208:208:208:212	miss:miss:miss:miss	260:266:269:269	290:290:290:296	317:353:353:356	209:209:209:209
308,	244:246:248:250	211:211:211:217	257:259:259:265	188:188:188:190	209:215:218:218	187:190:196:199	224:224:238:238	208:208:208:208	246:250:250:252	240:240:242:242	247:247:253:253	328:328:334:336	284:284:284:286	251:251:253:261	184:186:186:190	294:294:296:296	208:208:208:208	288:288:288:288	248:248:272:272	290:290:296:296	353:353:353:356	209:212:212:212
309,	244:246:246:252	217:217:220:226	259:259:267:271	188:190:190:190	209:215:215:218	187:187:187:190	238:238:238:238	205:208:208:208	244:246:250:264	240:242:242:244	245:247:247:263	332:334:334:336	286:286:288:292	245:251:253:263	186:186:186:190	294:294:294:294	208:210:212:214	288:288:288:288	263:263:266:269	293:296:296:296	353:356:356:356	206:209:215:218
310,	246:246:246:250	211:217:217:217	257:257:259:267	188:188:188:190	209:209:218:221	187:187:187:187	226:238:238:238	205:205:205:208	244:250:258:264	232:232:244:246	245:247:253:253	332:334:334:338	284:286:286:286	249:251:251:251	184:186:186:186	292:292:294:296	208:208:210:216	288:288:288:298	263:263:266:266	293:296:296:296	317:332:350:350	206:209:209:209
311,	246:246:246:250	217:217:217:220	257:257:259:271	188:188:188:188	209:215:215:218	187:187:187:196	238:238:238:246	208:208:208:208	240:244:254:260	234:234:240:252	253:257:261:263	332:332:334:338	284:284:284:286	249:251:253:261	186:186:190:190	292:292:292:294	208:208:210:210	288:288:288:288	266:266:266:266	290:290:296:296	353:353:353:356	206:209:209:215
312,	246:250:252:252	217:217:217:220	259:259:259:265	188:188:188:188	209:215:215:218	187:187:190:196	238:238:238:238	205:205:208:208	244:250:254:262	232:232:238:240	253:253:253:253	334:334:334:338	284:284:286:286	249:251:251:251	186:186:186:186	292:292:292:296	208:208:208:220	288:288:288:292	263:263:266:266	290:290:290:296	353:356:356:359	209:212:212:218
313,	246:246:246:246	211:217:217:220	259:259:259:271	188:188:188:190	215:215:218:218	187:187:187:190	238:238:238:238	205:205:208:208	244:244:254:256	234:242:244:244	237:245:253:253	334:334:336:338	284:286:286:286	249:251:251:251	186:186:188:190	292:292:292:292	208:208:210:212	miss:miss:miss:miss	266:266:266:266	290:293:296:299	317:353:356:356	209:209:212:212
314,	246:246:256:262	211:217:217:217	257:257:259:267	188:188:188:190	209:215:215:218	187:187:187:190	238:238:238:238	205:208:208:208	240:244:252:252	232:234:236:242	249:249:259:259	332:334:338:338	284:284:284:292	251:253:257:263	186:190:190:194	miss:miss:miss:miss	208:208:208:210	288:288:288:288	248:248:263:281	293:296:296:296	344:344:356:356	212:212:212:215
315,	246:246:246:250	211:211:217:220	259:265:267:267	188:188:188:188	215:215:215:218	187:187:187:187	238:238:238:216	205:205:208:208	244:248:250:262	236:240:240:242	239:243:253:267	336:336:338:338	286:290:290:292	251:253:257:259	186:186:186:190	296:296:296:296	210:210:210:210	288:288:288:294	263:263:263:263	290:290:293:296	353:353:356:356	206:206:209:212
316,	244:246:250:252	211:217:217:217	257:259:265:269	188:188:190:190	209:215:215:215	187:187:187:187	234:234:234:236	208:208:208:211	238:244:246:254	232:240:244:246	239:239:245:245	332:334:334:342	284:284:288:292	241:245:249:251	184:186:186:188	292:296:296:296	208:208:210:210	miss:miss:miss:miss	263:266:266:272	290:296:296:296	350:350:356:359	209:209:209:212
317,	246:246:254:262	211:211:217:220	259:259:265:273	188:188:188:188	215:215:215:215	178:187:187:199	224:234:238:238	205:208:208:208	240:244:258:258	236:236:242:244	245:245:245:247	332:332:338:338	284:286:286:292	249:251:251:253	186:186:186:186	294:294:304:304	208:208:210:212	miss:miss:miss:miss	266:266:266:272	290:293:293:296	353:356:356:359	209:212:212:212
pop 12
318,	244:246:246:246	211:211:217:217	259:265:271:271	miss:miss:miss:miss	212:215:218:224	187:187:190:190	216:222:238:238	205:205:205:205	240:250:252:258	232:240:242:244	239:245:247:253	332:338:338:342	284:284:284:286	245:245:251:251	186:186:186:190	292:292:296:296	208:208:210:210	272:284:288:302	257:266:266:266	290:296:296:296	317:353:356:356	209:209:209:212
319,	miss:miss:miss:miss	miss:miss:miss:miss	miss:miss:miss:miss	188:190:190:190	215:215:215:224	187:187:196:199	238:238:238:246	208:208:208:208	250:250:254:256	240:242:242:250	miss:miss:miss:miss	332:332:334:338	284:284:284:286	miss:miss:miss:miss	186:186:188:194	miss:miss:miss:miss	208:208:208:210	miss:miss:miss:miss	263:263:263:266	290:290:293:296	miss:miss:miss:miss	209:209:212:215
320,	244:246:246:252	211:214:217:220	259:261:271:271	188:188:188:190	215:215:215:218	187:187:187:187	238:238:238:238	205:205:205:208	miss:miss:miss:miss	234:234:234:240	243:243:243:243	336:338:338:338	284:284:286:288	251:251:251:251	184:186:186:186	miss:miss:miss:miss	208:208:210:210	276:288:288:288	266:269:269:272	290:290:293:296	353:353:356:356	209:209:212:212
321,	246:246:246:250	217:217:220:220	miss:miss:miss:miss	miss:miss:miss:miss	215:215:215:218	187:187:187:187	238:238:238:238	208:208:208:208	240:240:250:260	236:240:242:244	239:245:259:265	miss:miss:miss:miss	284:284:286:286	249:251:255:261	184:184:186:186	miss:miss:miss:miss	210:210:210:214	miss:miss:miss:miss	miss:miss:miss:miss	290:296:296:299	353:353:356:356	206:209:209:212
322,	miss:miss:miss:miss	211:217:217:217	257:257:259:259	188:188:190:190	209:215:218:218	187:187:187:199	236:238:238:238	208:208:208:208	miss:miss:miss:miss	240:244:246:246	249:253:255:259	miss:miss:miss:miss	284:284:286:288	245:245:249:255	186:186:188:190	292:292:298:298	208:210:210:214	288:288:288:302	263:263:266:266	290:296:296:296	353:356:356:356	206:209:209:212
323,	244:246:246:252	211:217:217:220	259:259:259:259	188:188:188:190	209:215:218:221	187:187:187:190	226:238:238:238	205:205:205:208	miss:miss:miss:miss	236:240:242:244	247:247:247:253	332:336:338:338	284:284:284:290	245:245:257:261	186:190:194:194	292:292:292:292	miss:miss:miss:miss	288:288:288:292	263:266:266:266	290:293:296:296	347:353:353:356	206:209:209:212
324,	246:250:250:262	217:217:217:217	259:263:269:273	188:188:190:190	209:215:218:224	175:187:190:190	234:238:238:246	205:205:208:208	238:240:240:244	236:238:240:244	245:245:265:265	330:334:334:338	284:286:286:286	245:245:251:251	186:186:188:190	292:292:296:296	208:208:210:210	288:288:288:288	263:263:266:266	290:296:296:296	332:353:353:356	209:212:212:212
325,	242:246:246:250	217:217:220:226	257:259:259:271	188:188:190:192	209:215:218:221	175:187:187:187	234:238:238:238	208:208:208:208	240:244:244:250	240:242:242:244	247:247:259:259	334:334:334:338	284:284:286:292	245:249:249:251	186:186:188:188	296:296:298:298	208:208:208:212	272:288:288:294	248:248:263:266	290:296:296:296	353:353:353:356	206:209:209:215
326,	242:246:246:254	211:217:220:226	259:261:271:271	188:188:188:190	215:221:224:224	178:187:190:193	226:238:238:242	205:208:211:214	240:244:258:260	236:240:244:244	miss:miss:miss:miss	334:334:334:338	284:286:290:292	245:249:249:251	186:190:192:194	miss:miss:miss:miss	208:210:210:220	288:288:288:288	miss:miss:miss:miss	296:296:296:296	miss:miss:miss:miss	206:206:209:209
327,	246:246:250:256	211:217:217:217	259:261:271:271	188:188:190:190	215:215:215:218	187:187:187:190	238:238:238:238	208:208:208:208	miss:miss:miss:miss	234:234:234:240	243:243:243:243	332:332:334:342	284:284:286:288	miss:miss:miss:miss	184:186:186:186	miss:miss:miss:miss	208:208:210:210	288:288:288:302	266:269:269:272	296:296:296:296	353:353:356:356	209:209:212:212
328,	244:246:246:250	211:217:220:226	259:265:265:271	188:188:188:190	209:215:215:218	187:187:187:187	224:224:238:246	205:205:208:208	240:240:250:254	234:238:240:240	245:247:253:261	334:334:334:336	284:286:290:292	245:251:251:251	186:186:186:186	292:292:292:292	206:208:208:212	288:288:288:288	266:266:266:266	296:296:296:299	332:353:353:353	206:209:209:215
329,	246:246:246:250	217:217:217:220	257:259:265:269	miss:miss:miss:miss	209:215:218:218	187:187:187:190	230:230:238:238	205:208:208:208	miss:miss:miss:miss	242:244:250:252	miss:miss:miss:miss	332:334:334:338	286:286:286:288	miss:miss:miss:miss	186:186:190:192	miss:miss:miss:miss	miss:miss:miss:miss	miss:miss:miss:miss	248:263:266:272	296:296:296:296	miss:miss:miss:miss	miss:miss:miss:miss
330,	246:248:248:262	217:217:220:220	257:257:271:279	188:188:190:190	209:215:215:218	187:187:187:199	222:222:238:238	205:208:208:208	240:246:250:252	242:242:244:244	245:245:247:247	332:332:332:338	284:286:290:292	251:251:251:257	186:186:186:190	292:292:292:292	208:210:210:210	288:294:294:296	248:266:266:266	290:290:296:299	350:356:356:356	206:212:212:212
331,	242:246:246:246	211:214:217:220	259:259:263:267	188:188:188:190	215:215:218:218	187:187:187:199	miss:miss:miss:miss	205:205:205:211	248:248:254:260	234:234:242:244	239:239:263:265	330:334:334:338	284:286:286:288	251:251:251:251	184:186:186:186	292:292:292:292	208:210:210:210	miss:miss:miss:miss	263:263:266:266	293:296:296:296	332:350:350:353	206:206:206:212
332,	246:246:246:252	217:217:217:217	257:259:259:265	188:188:190:190	215:218:218:224	187:187:187:190	224:238:238:238	205:208:208:208	240:244:258:260	240:242:242:244	245:253:253:263	330:332:334:336	286:286:286:286	249:251:251:253	186:186:186:188	294:294:296:296	208:210:210:220	288:288:294:296	248:248:263:272	293:296:296:296	332:350:350:353	206:206:209:212
333,	242:244:250:252	211:217:217:217	259:259:259:267	188:188:190:190	209:215:215:215	187:199:199:199	238:238:238:238	208:208:208:208	246:250:250:258	240:240:242:246	243:245:249:253	334:334:338:344	284:286:286:286	251:251:251:257	186:186:186:190	296:298:298:298	miss:miss:miss:miss	288:288:288:294	260:260:260:275	290:290:296:302	353:353:353:356	209:212:215:215
334,	242:246:246:246	211:217:220:220	259:259:263:267	188:188:188:188	215:215:218:218	187:187:187:187	216:226:236:238	205:208:208:208	miss:miss:miss:miss	234:234:242:244	239:239:263:265	330:334:334:338	284:286:286:288	251:251:251:251	184:186:186:186	292:292:292:292	208:210:210:210	272:284:290:296	263:263:263:278	290:296:296:296	350:350:353:356	206:206:206:212
335,	246:246:250:262	217:220:220:220	263:265:265:271	188:188:188:188	212:215:215:218	187:187:187:196	222:228:238:238	205:208:208:208	240:246:250:260	238:240:244:252	243:245:245:247	332:334:334:334	284:284:284:288	249:251:251:257	186:186:186:194	294:294:296:296	miss:miss:miss:miss	miss:miss:miss:miss	266:266:266:266	290:290:296:296	317:353:353:356	209:209:212:212
336,	246:246:250:262	211:217:217:217	259:263:275:287	188:188:190:190	209:209:215:215	187:187:190:199	238:238:238:238	205:208:208:208	240:244:244:256	238:240:242:244	253:253:263:263	332:336:344:344	286:286:290:290	245:245:245:251	186:186:186:186	294:294:296:296	208:208:208:208	292:292:294:294	260:266:266:272	296:296:299:305	344:350:356:356	209:215:215:215
337,	246:246:246:250	217:217:220:220	257:259:265:269	188:188:188:188	209:215:218:218	187:187:187:187	230:238:238:238	205:208:208:208	240:244:244:256	miss:miss:miss:miss	245:253:253:265	332:334:334:338	284:284:284:286	miss:miss:miss:miss	186:186:192:194	miss:miss:miss:miss	208:212:216:218	290:290:294:294	260:266:266:266	296:296:299:305	344:350:356:356	206:209:209:212
338,	242:244:246:246	217:217:220:220	259:259:263:265	188:188:188:188	209:215:215:218	187:187:187:187	230:238:238:238	208:208:208:211	246:246:252:258	232:232:232:244	245:253:253:265	miss:miss:miss:miss	284:284:284:286	247:249:251:251	184:186:186:192	292:292:292:292	208:212:216:218	290:290:294:294	260:266:266:266	296:296:296:296	350:350:356:356	206:209:209:212
339,	miss:miss:miss:miss	211:217:217:217	259:265:271:271	188:188:190:192	215:218:218:221	187:187:187:199	238:238:238:238	205:205:208:208	miss:miss:miss:miss	234:234:236:240	247:247:253:253	332:332:334:336	284:284:286:290	249:249:249:251	186:186:186:188	292:292:296:296	miss:miss:miss:miss	miss:miss:miss:miss	263:263:266:266	290:296:296:296	317:344:356:356	miss:miss:miss:miss
340,	246:246:252:254	211:217:217:217	257:271:273:275	188:188:188:190	209:209:215:218	175:187:187:190	234:236:236:246	208:208:208:208	248:248:254:260	234:242:244:244	249:253:257:263	330:338:338:342	284:286:286:286	245:249:251:251	190:192:192:196	292:292:292:292	208:208:208:210	288:288:288:288	248:263:263:266	290:290:296:302	353:353:353:356	209:212:212:212
341,	246:246:252:254	211:211:220:220	257:271:273:275	188:188:190:190	209:209:215:218	187:187:187:199	238:238:238:238	208:208:208:208	248:248:254:260	242:242:242:252	247:253:253:255	330:338:338:342	286:290:292:292	245:249:251:251	184:186:186:188	292:292:292:292	208:208:208:210	286:288:288:288	263:263:266:272	290:290:296:302	353:353:353:356	209:209:215:215
342,	246:246:250:258	217:217:217:217	257:265:265:271	188:188:188:190	215:215:218:218	187:187:187:190	228:234:234:246	205:205:208:208	240:240:252:256	240:240:242:242	247:253:257:265	328:332:334:336	284:284:286:290	249:251:253:255	186:186:186:190	292:296:296:296	208:208:212:212	miss:miss:miss:miss	263:266:272:272	290:290:293:296	350:350:353:356	209:209:212:212
343,	246:246:250:252	211:217:217:217	259:269:269:273	188:188:188:190	215:215:218:221	175:187:187:190	234:236:236:246	205:205:208:208	240:240:250:254	234:242:244:244	249:253:257:263	336:336:336:338	284:286:286:286	245:249:251:251	186:186:188:188	292:292:292:292	208:208:208:210	288:288:288:288	248:263:263:266	290:290:296:302	353:356:356:356	209:212:212:212
344,	244:250:252:252	211:217:217:217	257:257:259:271	188:188:190:190	209:209:215:215	187:187:190:199	230:238:238:238	205:208:208:208	250:250:254:260	240:240:246:248	263:263:263:263	332:332:332:338	284:286:286:286	249:249:251:257	186:186:186:186	miss:miss:miss:miss	208:210:210:210	284:284:286:302	263:263:278:278	290:290:293:296	344:350:350:356	209:209:212:212
345,	246:246:252:256	211:217:217:220	259:259:259:271	188:188:188:188	215:215:218:218	187:187:190:199	236:238:238:238	205:208:208:208	240:240:244:256	246:246:246:248	245:257:257:259	332:334:334:338	284:284:286:290	249:249:249:251	186:186:186:190	296:296:296:296	208:208:210:216	288:288:288:288	263:266:266:266	290:296:296:296	350:350:353:356	209:212:212:212
pop 13
346,	246:246:246:252	217:217:217:220	263:271:271:271	188:188:190:190	212:215:215:218	187:187:187:190	230:238:238:238	205:205:208:208	244:244:250:258	234:236:240:242	249:253:253:257	332:336:338:344	284:284:286:286	245:249:249:249	186:186:186:188	298:298:298:298	210:210:210:220	286:286:290:300	248:248:263:263	290:290:296:296	344:350:350:356	209:212:212:218
347,	miss:miss:miss:miss	211:217:217:220	259:259:259:263	186:186:188:188	209:215:218:218	187:187:187:187	230:238:238:238	205:205:205:208	240:244:244:246	240:240:246:246	247:247:247:253	332:334:334:334	284:284:284:286	245:251:253:257	186:186:192:194	292:294:294:298	miss:miss:miss:miss	288:288:288:288	263:272:272:272	293:293:296:296	350:353:356:356	212:212:215:215
348,	246:246:250:254	217:217:217:220	257:257:259:275	190:190:190:190	218:218:218:221	187:187:187:199	228:234:234:234	205:208:208:208	miss:miss:miss:miss	240:242:242:244	259:259:259:259	334:334:336:338	284:284:284:286	249:251:259:259	186:186:186:188	294:294:294:294	208:208:210:212	288:288:296:300	260:263:266:275	290:293:296:296	317:317:353:356	206:206:209:212
349,	242:246:246:250	211:217:220:226	259:263:271:273	miss:miss:miss:miss	209:215:215:218	187:187:187:187	238:238:238:238	205:208:208:208	246:246:258:262	242:244:248:250	253:253:253:263	332:332:334:338	284:284:286:290	251:257:263:265	186:186:186:188	292:292:296:296	208:208:210:210	288:288:294:294	266:266:266:275	290:290:296:296	317:350:356:356	209:209:212:212
350,	246:246:246:250	217:217:217:238	259:265:269:271	188:190:190:190	215:215:218:224	187:187:190:190	226:238:238:238	208:208:208:208	244:248:248:254	234:240:240:240	253:253:253:253	336:336:336:338	284:284:284:286	249:251:251:253	186:186:190:194	292:292:296:296	210:210:210:212	288:288:288:288	266:266:272:272	290:296:296:296	344:353:356:356	209:209:212:212
351,	miss:miss:miss:miss	211:211:211:217	257:257:265:271	188:188:188:190	209:212:215:218	187:187:187:199	230:238:238:238	205:208:208:208	246:246:254:266	240:242:242:244	253:253:253:253	332:334:336:336	284:284:286:292	249:249:249:251	186:186:186:192	miss:miss:miss:miss	208:208:210:210	288:288:288:288	248:260:263:266	290:290:293:296	317:350:356:356	209:212:212:212
352,	246:246:250:252	211:217:217:220	259:263:265:271	188:188:190:190	209:209:215:215	187:187:190:190	236:238:238:238	205:205:208:208	240:242:256:258	240:240:244:244	245:247:259:259	334:334:334:336	284:284:284:286	249:249:251:251	186:186:186:194	292:292:292:292	208:208:208:212	272:284:288:300	263:266:266:272	290:293:296:296	344:344:356:356	206:209:209:209
353,	246:246:246:252	217:217:217:220	259:265:271:273	188:188:188:188	212:215:218:218	187:187:187:187	232:238:238:238	205:208:208:208	246:252:256:262	240:242:242:244	247:253:261:261	334:336:338:338	284:284:284:286	249:249:251:251	186:186:190:192	292:296:296:296	208:208:208:208	288:288:288:290	248:248:248:248	290:296:296:296	317:350:353:356	206:206:209:209
354,	246:246:248:252	217:217:217:220	259:265:271:273	188:188:188:188	212:215:218:218	187:187:187:187	232:238:238:238	205:208:208:208	246:252:256:262	240:240:242:244	247:253:253:259	332:336:338:338	284:284:284:286	249:251:251:251	186:186:190:192	292:292:296:296	208:208:208:208	286:286:288:290	248:248:248:248	290:296:296:296	317:350:353:356	206:206:209:209
355,	miss:miss:miss:miss	211:217:217:217	miss:miss:miss:miss	miss:miss:miss:miss	209:215:215:218	miss:miss:miss:miss	miss:miss:miss:miss	205:205:208:208	miss:miss:miss:miss	240:240:246:246	245:247:263:265	332:332:332:338	miss:miss:miss:miss	245:249:249:253	186:186:190:194	292:292:294:294	miss:miss:miss:miss	miss:miss:miss:miss	263:266:272:275	293:293:296:296	miss:miss:miss:miss	209:212:212:215
356,	244:246:246:250	211:211:217:217	257:259:259:265	188:188:188:188	215:215:215:215	187:187:187:187	216:234:238:238	205:205:208:208	244:250:250:262	234:240:246:248	243:243:263:263	338:338:338:338	284:284:286:288	249:249:251:251	186:186:186:186	miss:miss:miss:miss	208:208:208:218	272:284:288:290	263:272:275:275	290:290:296:302	332:341:350:356	209:209:209:209
357,	246:246:246:250	211:211:217:226	257:259:259:259	188:188:190:190	215:215:215:218	187:187:187:187	232:238:238:238	205:205:208:208	244:244:244:246	240:242:242:244	243:261:263:263	334:336:338:338	286:286:286:286	247:249:251:261	184:184:186:186	292:292:294:298	210:210:210:210	272:288:288:290	263:266:266:266	296:296:296:296	miss:miss:miss:miss	209:209:209:209
358,	246:246:252:266	211:217:217:220	257:257:269:271	188:188:190:190	209:209:218:218	187:187:187:187	228:234:238:238	205:205:208:208	244:244:244:250	238:240:242:244	239:239:261:263	330:332:332:332	284:286:288:288	249:251:251:257	184:186:194:204	292:292:292:292	208:208:208:210	288:288:288:298	263:266:266:266	290:290:296:296	miss:miss:miss:miss	209:209:212:218
359,	246:246:250:262	217:217:217:220	257:259:259:271	188:188:190:190	212:215:218:221	187:187:187:199	224:232:234:234	205:205:208:208	250:264:266:268	236:240:240:240	243:243:243:243	332:332:332:332	284:284:284:290	249:249:251:257	186:186:186:188	296:296:296:298	208:208:212:218	288:288:298:302	266:266:266:266	293:296:296:296	332:353:353:356	209:209:209:218
360,	244:246:246:246	217:217:220:226	259:269:269:271	188:188:188:188	215:215:218:218	187:187:190:196	238:238:238:238	208:208:208:208	246:258:260:262	234:236:236:240	253:255:265:267	334:334:336:338	284:286:286:290	245:245:251:251	186:186:190:190	292:292:292:292	208:208:210:210	288:288:290:294	263:266:272:278	296:296:296:296	347:353:353:356	209:209:212:212
361,	246:246:246:252	217:217:217:217	257:259:259:259	188:188:188:190	215:215:218:218	187:187:190:190	238:238:238:238	205:208:208:208	miss:miss:miss:miss	240:244:246:248	239:239:253:253	330:330:332:336	284:284:284:290	245:245:245:249	186:186:188:190	292:292:292:292	208:208:208:208	288:288:290:294	263:263:266:272	290:290:290:296	347:353:353:356	209:209:209:215
362,	246:248:248:262	211:211:217:220	259:267:269:271	188:188:190:190	209:215:218:218	190:190:190:196	234:234:234:234	205:205:208:208	250:252:252:262	234:234:240:240	239:239:247:253	330:334:334:338	284:284:286:288	249:251:251:253	186:186:186:190	296:296:296:296	208:210:210:218	282:282:282:298	miss:miss:miss:miss	290:290:290:296	317:344:353:356	206:209:212:221
363,	246:246:246:252	211:211:217:220	259:259:259:265	188:188:188:190	206:215:215:224	187:187:187:187	216:248:248:248	208:208:208:208	240:244:250:252	238:240:250:252	245:255:261:263	332:332:332:334	284:286:288:290	245:249:251:257	186:186:186:188	296:296:296:296	208:210:212:212	288:288:288:290	260:266:266:272	290:290:293:296	347:353:353:356	206:209:209:212
364,	246:246:250:262	217:217:217:220	257:259:259:271	188:188:190:190	212:215:218:221	187:187:187:199	224:232:234:234	205:205:208:208	250:264:266:268	236:240:240:240	243:243:243:243	334:334:334:334	284:284:284:290	249:249:251:257	186:186:186:188	296:296:296:298	208:208:212:218	288:288:296:302	266:266:266:266	293:296:296:296	347:353:353:356	209:209:209:218
365,	242:246:252:252	214:217:217:217	259:259:271:273	188:190:190:190	209:212:215:221	187:187:187:190	230:230:238:238	205:205:208:208	244:244:264:270	240:242:248:250	247:247:253:253	miss:miss:miss:miss	284:284:286:286	251:253:257:257	186:186:186:188	292:292:292:292	208:208:210:216	288:288:288:288	266:266:266:266	290:290:290:296	332:353:353:356	miss:miss:miss:miss
366,	246:246:246:254	217:220:223:226	257:259:265:267	188:188:188:190	209:215:215:221	187:187:196:199	228:234:238:238	205:205:208:208	240:244:254:262	238:240:250:252	243:247:247:247	332:334:336:338	284:284:284:286	245:251:257:265	186:186:186:186	292:292:296:296	210:210:210:216	288:288:288:288	248:266:266:266	296:296:296:296	347:353:353:356	209:209:209:209
367,	246:246:246:254	211:217:217:217	257:259:265:267	188:188:188:188	209:215:215:221	187:187:187:190	234:234:238:240	205:205:205:205	240:244:254:262	miss:miss:miss:miss	245:247:253:253	332:334:336:338	284:284:286:286	241:251:253:257	184:188:190:194	292:292:296:296	208:208:216:218	296:296:296:296	263:266:272:278	290:290:293:296	347:353:353:356	206:212:215:218
368,	246:246:252:254	211:217:217:217	257:259:259:271	188:188:188:188	215:218:218:221	187:187:187:190	234:234:238:240	205:205:205:205	240:244:254:262	238:240:240:242	245:247:253:253	332:332:336:338	284:284:286:286	245:249:251:257	186:186:190:192	292:292:292:292	208:208:216:218	296:296:296:296	263:266:272:278	290:290:293:296	347:353:353:356	206:209:212:218
369,	246:246:250:254	217:217:217:217	257:257:259:259	188:188:190:190	209:215:215:221	187:199:199:199	228:228:238:238	205:208:208:208	252:254:256:258	242:242:242:246	249:253:261:263	334:334:334:338	284:286:286:290	245:249:249:251	186:186:190:190	296:296:296:296	208:210:212:214	288:288:288:298	248:263:263:266	293:293:296:296	347:353:353:356	206:209:209:209
370,	242:246:248:252	211:217:217:220	259:259:259:265	188:188:188:190	215:215:218:221	187:187:187:199	238:238:238:238	205:208:208:208	244:256:260:264	238:240:242:244	251:253:253:253	330:330:334:336	284:284:286:286	249:251:251:251	186:186:186:190	296:296:296:296	208:208:210:220	288:288:294:298	248:248:257:257	290:296:296:296	347:353:353:356	206:209:209:209
371,	246:246:246:250	211:217:220:220	257:259:265:267	188:188:188:190	206:206:212:215	187:187:187:190	216:238:238:238	205:208:208:208	244:246:262:266	234:236:238:238	247:261:263:265	332:332:334:338	284:284:288:288	249:251:251:251	186:186:190:190	296:296:296:298	208:208:210:212	288:288:288:288	266:266:266:266	290:293:296:296	347:353:353:356	209:209:212:218
372,	246:246:250:252	217:217:217:217	259:263:265:271	188:188:188:190	215:215:215:221	187:187:187:199	230:234:238:238	205:205:208:208	240:244:252:260	240:242:244:246	miss:miss:miss:miss	332:336:338:344	284:284:286:290	245:245:249:251	miss:miss:miss:miss	292:292:292:294	208:208:208:210	288:288:288:288	263:263:263:266	290:290:296:296	347:353:353:356	209:209:209:212
373,	246:246:250:254	211:217:217:217	257:259:259:259	188:190:190:190	209:209:215:218	187:187:187:199	234:238:238:238	205:205:205:208	miss:miss:miss:miss	232:232:240:242	253:255:259:263	330:332:332:338	284:284:286:288	249:251:251:251	184:186:190:190	294:294:294:294	208:208:208:218	288:288:288:292	263:266:266:266	290:293:296:296	332:353:353:356	209:209:212:212
pop 14
374,	242:246:246:248	217:217:217:217	259:259:265:265	188:188:188:190	215:215:218:221	187:187:187:187	228:238:238:238	205:205:205:208	240:240:250:254	miss:miss:miss:miss	249:253:253:255	328:332:334:334	286:286:286:286	245:247:251:251	186:186:186:190	miss:miss:miss:miss	208:208:216:216	296:296:296:296	266:266:266:278	290:296:296:296	350:356:356:356	206:206:209:209
375,	242:246:250:252	211:211:217:220	257:259:265:265	188:188:188:188	miss:miss:miss:miss	187:187:187:190	228:238:238:238	205:205:208:208	244:244:252:258	miss:miss:miss:miss	243:243:255:255	332:332:336:338	284:284:286:286	251:251:251:251	182:182:182:186	292:292:292:292	208:208:208:208	288:288:288:288	248:248:263:263	290:290:293:296	353:353:356:356	206:209:209:212
376,	242:246:250:250	217:217:217:217	259:259:269:269	188:188:188:190	215:215:215:218	187:187:187:190	224:234:238:238	205:205:208:208	240:244:256:264	242:242:242:242	243:243:253:261	328:332:332:338	284:286:286:286	251:251:251:263	186:186:190:190	294:294:294:294	208:208:210:210	288:288:294:298	266:266:272:272	296:296:296:305	350:350:356:356	209:209:212:218
377,	246:246:246:246	211:217:217:217	259:259:259:265	188:190:190:190	215:215:215:218	187:187:187:199	234:238:238:238	205:205:208:208	244:250:250:258	236:236:240:240	245:245:253:253	332:332:338:338	284:284:286:288	245:249:249:251	188:188:188:194	292:292:296:296	208:208:208:208	294:294:296:296	248:248:275:275	290:296:296:296	317:353:356:356	206:209:209:212
378,	246:246:248:250	211:211:217:217	257:259:259:259	188:188:188:190	miss:miss:miss:miss	187:187:187:187	230:232:238:238	208:208:208:208	240:250:250:256	232:232:240:252	245:247:255:263	332:332:332:334	284:284:284:284	245:251:251:253	186:186:186:204	294:294:296:296	208:208:210:210	288:288:288:288	263:263:266:266	290:296:296:299	317:353:356:356	206:206:218:218
379,	246:246:246:246	211:211:217:217	259:259:265:271	188:188:190:190	209:215:215:218	187:187:187:187	234:234:238:238	208:208:208:208	244:250:262:264	236:236:258:258	245:245:249:249	332:338:338:338	284:284:284:288	249:249:249:249	186:186:188:188	292:296:296:296	208:208:208:208	294:294:296:296	260:260:272:275	290:296:296:296	317:317:317:356	209:209:212:212
380,	244:244:246:250	217:217:220:226	257:259:265:265	190:190:190:190	miss:miss:miss:miss	187:187:187:199	238:238:238:238	205:205:205:208	240:250:258:262	240:240:240:242	239:239:247:253	332:334:338:338	284:284:286:286	245:251:251:251	186:186:186:190	292:292:292:292	208:208:210:210	288:288:288:288	263:263:266:266	293:293:296:296	350:353:353:356	206:209:209:212
381,	242:246:248:250	217:217:220:220	257:257:259:265	188:188:190:190	212:215:218:224	187:187:190:190	238:238:238:238	208:208:208:208	240:244:244:264	234:248:250:250	243:247:253:261	328:332:332:332	284:286:288:290	249:251:251:261	186:186:186:186	294:294:294:294	208:210:210:210	290:290:294:294	263:263:263:263	293:293:296:296	332:353:353:356	206:209:212:212
382,	246:246:248:250	217:217:220:220	257:259:263:265	188:188:190:190	209:215:215:221	187:187:187:187	238:238:246:246	205:208:208:208	240:244:258:264	240:244:248:250	245:245:245:245	328:332:336:338	284:284:284:290	245:251:251:251	182:186:186:190	miss:miss:miss:miss	208:208:210:210	288:288:296:302	263:266:266:266	290:290:290:296	353:353:353:356	miss:miss:miss:miss
383,	246:246:246:246	217:217:220:226	259:259:265:275	188:188:188:190	209:209:215:215	187:187:190:190	238:238:238:246	205:208:208:208	240:252:256:258	242:242:246:246	239:243:253:265	332:332:334:336	284:286:286:288	245:245:251:251	186:186:188:190	292:292:296:298	208:208:208:208	288:288:288:288	260:263:263:278	293:293:296:296	353:353:356:356	209:209:212:212
384,	246:248:248:250	211:211:217:217	257:257:267:267	188:190:190:190	206:218:218:218	187:187:187:190	226:238:238:246	205:208:208:208	244:254:260:264	240:240:244:244	239:239:261:261	332:332:334:338	284:284:284:286	249:251:251:255	184:184:186:190	292:292:296:296	208:210:210:210	288:288:290:290	248:248:263:263	290:296:296:296	332:332:356:359	206:206:212:212
385,	242:246:246:250	211:217:217:217	259:265:269:271	188:188:188:190	209:215:215:221	187:187:187:187	234:238:238:238	208:208:208:208	244:250:258:264	240:252:252:252	245:247:253:261	332:332:332:332	284:284:284:288	249:251:255:257	186:186:186:186	296:296:296:296	208:208:208:210	284:288:288:296	248:248:266:275	290:290:293:296	353:353:353:356	206:209:209:212
386,	246:246:248:250	217:217:217:217	257:259:259:269	188:190:190:190	209:212:215:218	180:187:190:190	222:230:234:238	208:208:208:208	miss:miss:miss:miss	240:240:240:240	245:255:261:267	328:332:332:332	284:286:286:286	245:245:251:251	186:186:188:190	miss:miss:miss:miss	208:208:210:210	288:288:290:296	263:263:266:269	296:296:296:299	350:350:350:356	miss:miss:miss:miss
387,	246:246:246:248	217:217:217:220	257:259:267:267	188:188:190:190	209:218:218:221	187:187:190:199	216:226:238:238	205:205:208:208	240:250:252:254	234:244:246:246	245:245:253:253	332:332:338:338	284:284:286:286	249:249:251:263	186:186:186:190	292:292:292:294	208:208:210:210	290:296:296:296	263:263:263:263	290:293:296:296	353:353:353:356	miss:miss:miss:miss
388,	246:246:246:250	217:217:217:220	257:259:265:271	188:188:188:190	209:209:215:218	187:187:187:196	220:228:228:238	208:208:208:208	250:250:256:264	234:240:240:242	253:253:261:261	332:332:332:332	284:284:286:286	245:251:251:251	186:186:186:194	miss:miss:miss:miss	208:208:210:210	274:282:288:288	263:263:266:272	290:290:293:293	356:356:356:356	206:209:212:212
389,	246:246:246:250	217:217:217:220	257:259:265:271	miss:miss:miss:miss	209:215:215:218	miss:miss:miss:miss	220:228:228:238	208:208:208:208	250:250:256:264	234:234:240:242	253:253:261:261	332:332:332:332	284:284:286:286	245:251:251:251	186:186:186:194	294:294:294:294	208:208:210:210	miss:miss:miss:miss	263:266:266:272	290:290:293:293	356:356:356:356	206:209:212:212
390,	246:246:248:250	211:211:217:217	257:257:267:267	188:190:190:190	206:218:218:218	miss:miss:miss:miss	226:238:238:246	205:208:208:208	244:254:260:264	234:240:240:244	239:239:261:261	332:332:334:338	284:284:284:286	249:251:251:255	184:184:186:190	292:292:296:296	208:208:210:210	288:288:290:290	248:248:263:263	290:290:293:293	332:332:356:359	206:206:212:212
391,	246:246:246:246	217:217:217:217	miss:miss:miss:miss	188:188:188:188	215:218:221:224	187:187:187:187	228:234:238:238	208:208:208:208	240:244:250:250	240:240:240:242	253:253:253:253	332:332:332:338	284:284:286:290	249:251:251:251	186:186:188:192	292:292:294:304	208:208:208:214	290:290:290:302	266:266:272:275	290:296:296:296	317:353:356:356	206:206:209:212
392,	246:246:246:246	217:217:217:217	257:259:259:271	188:188:188:188	215:218:221:224	187:187:187:187	228:234:238:238	208:208:208:208	240:244:250:250	240:240:242:242	253:253:253:253	332:332:332:338	284:284:286:290	249:251:251:251	186:186:188:192	292:292:294:304	208:208:208:214	290:290:290:302	266:266:272:275	290:290:296:296	317:353:356:356	206:206:209:212
393,	246:246:246:250	217:217:217:220	257:259:265:271	188:188:188:190	209:215:215:218	187:187:187:196	220:228:228:238	208:208:208:208	250:250:256:264	234:234:240:242	253:261:261:261	332:332:332:332	284:284:286:286	245:251:251:251	186:186:186:194	294:294:294:294	208:208:210:210	274:282:288:288	263:266:266:272	290:290:293:293	356:356:356:356	206:209:212:212
394,	246:246:246:246	217:217:217:217	257:259:265:265	188:190:190:190	215:215:215:218	187:187:187:187	224:230:236:238	205:208:208:211	244:250:252:254	234:240:242:242	243:245:245:247	332:332:332:332	284:286:286:286	251:251:251:255	184:186:186:186	294:294:294:294	208:208:208:208	288:288:288:296	248:248:248:248	290:293:296:296	347:356:356:359	209:209:215:221
395,	246:246:246:246	217:217:217:217	257:259:265:265	188:190:190:190	215:215:215:218	187:187:187:187	222:228:236:238	205:208:208:211	244:250:252:254	234:240:242:242	243:245:245:247	332:332:332:332	284:286:286:286	251:251:251:255	184:186:186:186	294:294:294:294	208:208:208:208	288:288:288:296	miss:miss:miss:miss	290:293:296:296	347:356:356:359	209:209:215:221
396,	246:250:250:250	217:217:217:217	259:259:269:269	188:188:188:190	215:215:215:218	187:187:187:190	224:234:238:238	205:205:208:208	240:244:256:264	242:242:242:244	243:243:253:261	miss:miss:miss:miss	284:286:286:286	251:251:251:263	186:186:190:190	294:294:294:294	208:208:210:210	288:288:294:298	266:266:272:272	296:296:296:305	350:350:356:356	209:209:212:212
397,	244:244:248:248	211:217:217:226	257:259:265:267	188:188:188:190	218:218:218:221	187:187:199:199	224:238:238:238	208:208:208:208	244:256:258:260	240:240:240:248	253:253:259:259	328:332:338:344	284:284:284:286	239:245:249:249	186:186:186:190	292:294:294:296	208:208:210:210	272:272:288:290	272:272:272:275	296:296:296:296	350:350:353:356	209:209:212:212
398,	246:246:246:246	217:217:217:220	259:259:259:265	188:188:190:190	209:215:215:215	187:187:187:187	228:238:238:238	208:208:208:208	244:246:254:260	miss:miss:miss:miss	245:245:253:253	332:332:338:344	284:284:286:290	245:249:249:251	186:186:190:192	294:294:294:304	208:208:210:210	miss:miss:miss:miss	263:266:266:272	290:290:290:296	353:353:356:356	206:209:209:212
399,	246:250:250:250	211:217:217:217	259:259:263:265	188:188:188:190	209:215:215:218	187:187:187:190	224:238:238:238	205:205:208:208	240:250:252:258	240:240:240:244	247:247:257:265	332:332:336:336	284:284:284:286	249:251:251:263	186:186:186:188	292:292:294:296	208:210:210:220	288:288:288:288	263:266:266:283	290:290:296:296	317:350:353:356	206:209:209:209
400,	242:248:248:250	211:214:217:220	257:259:259:267	188:188:188:188	215:215:218:218	187:187:187:199	238:238:238:238	205:208:208:208	252:258:258:260	240:240:240:240	247:253:253:261	332:332:336:338	284:286:290:292	249:251:251:253	186:186:186:190	292:292:296:296	208:208:208:214	288:288:288:296	248:263:266:266	290:290:296:296	344:353:356:359	miss:miss:miss:miss
pop 15
401,	246:246:248:250	217:217:217:217	257:257:259:267	188:188:188:190	209:215:218:218	187:187:190:199	238:238:238:238	205:208:208:208	246:250:250:260	240:240:240:246	247:247:253:261	332:332:338:338	284:284:288:292	249:249:251:251	184:186:190:192	292:292:292:292	208:208:208:210	288:288:294:294	miss:miss:miss:miss	290:296:296:296	350:353:356:356	206:206:206:209
402,	246:246:246:246	217:217:217:217	259:259:265:265	188:188:188:190	215:215:218:221	187:187:187:187	228:238:238:238	205:205:205:208	240:240:250:254	240:240:242:242	249:253:253:255	328:332:334:334	286:286:286:286	245:247:251:251	186:186:186:190	miss:miss:miss:miss	208:208:208:216	miss:miss:miss:miss	266:266:266:278	290:296:296:296	350:356:356:356	206:206:209:209
403,	242:246:250:252	211:211:217:220	257:259:265:265	188:188:188:188	209:215:215:218	187:187:187:190	228:238:238:238	205:205:208:208	244:244:252:258	238:238:240:240	243:243:255:255	332:332:336:338	284:284:286:286	251:251:251:251	182:186:186:186	292:292:292:292	208:208:208:208	288:288:288:288	248:248:263:263	290:290:293:296	353:353:356:356	206:209:209:212
404,	246:248:258:266	211:211:217:217	257:265:271:271	188:188:190:190	215:215:218:218	187:187:187:187	228:228:228:238	208:208:208:211	244:250:254:256	232:232:232:242	245:247:253:261	332:332:338:344	284:284:284:286	245:249:251:253	186:190:192:194	292:292:292:292	208:210:212:212	274:288:288:294	260:263:266:266	290:293:296:296	353:353:356:356	206:209:209:209
405,	246:246:248:252	211:217:217:217	259:259:267:271	188:188:188:190	miss:miss:miss:miss	187:187:187:187	228:228:238:246	205:205:205:208	244:254:258:264	240:240:242:244	253:253:255:255	332:332:336:336	286:286:286:290	245:249:251:255	186:186:186:186	miss:miss:miss:miss	208:208:208:208	288:288:288:288	248:248:263:266	290:290:290:296	317:317:356:356	209:209:209:209
406,	244:248:250:250	211:217:220:220	257:265:269:271	188:188:188:190	215:215:215:218	187:187:187:199	228:228:230:238	205:208:208:208	240:244:252:258	232:232:240:242	245:247:257:261	332:332:338:338	284:284:286:286	249:251:251:257	186:186:186:204	miss:miss:miss:miss	208:208:208:208	288:288:296:296	248:248:263:266	290:293:296:296	356:356:356:356	206:209:209:212
407,	246:246:246:248	211:217:220:229	259:259:259:269	188:188:190:190	215:215:215:215	187:187:190:196	228:238:238:246	205:205:208:208	244:256:260:266	232:236:240:240	243:243:253:261	332:332:332:332	284:284:286:286	249:251:251:251	186:186:186:186	292:292:292:292	208:208:208:216	288:288:288:288	263:263:266:266	290:290:296:302	317:317:353:356	209:209:209:212
408,	242:246:250:252	211:211:217:220	257:259:265:265	188:188:190:190	215:215:215:218	187:187:187:187	228:228:228:228	205:205:208:208	240:250:258:266	240:240:244:248	243:243:255:255	332:332:336:336	284:284:286:286	245:249:251:251	182:186:186:192	292:292:292:292	208:208:208:208	288:288:294:294	263:263:263:263	290:290:293:296	353:353:356:356	206:209:209:209
409,	246:246:250:250	211:211:217:217	257:259:265:271	188:188:190:190	miss:miss:miss:miss	187:187:190:199	228:228:228:228	205:205:208:208	240:244:260:264	240:240:244:248	253:253:257:257	330:330:334:338	284:286:286:288	245:249:251:251	186:186:190:194	292:292:292:292	208:210:210:216	288:296:300:300	257:257:257:263	290:290:293:296	350:353:353:356	206:206:206:206
410,	246:248:248:262	211:217:217:220	257:259:259:265	188:188:188:188	209:215:218:218	187:187:187:187	234:238:238:238	205:205:208:208	240:250:252:252	240:240:242:242	253:253:265:265	332:332:336:336	286:292:292:292	249:249:251:251	186:186:186:186	292:292:298:298	208:210:210:210	288:288:288:288	266:266:272:272	290:293:296:296	356:356:356:356	212:212:212:218
411,	244:246:246:254	211:217:220:226	259:259:259:271	188:190:190:190	215:215:215:221	187:190:190:199	238:238:238:238	208:208:208:208	244:254:258:266	240:240:244:244	255:255:261:261	332:332:332:332	284:286:286:286	245:247:249:251	186:186:186:188	294:294:296:304	208:208:210:210	288:288:288:288	248:248:266:266	290:293:296:296	344:356:356:356	209:209:209:209
412,	246:246:246:248	217:217:217:217	257:263:265:267	188:188:188:190	215:218:218:218	187:190:190:199	226:234:238:238	208:208:208:208	244:256:260:272	232:238:238:240	245:253:265:267	332:332:334:334	284:284:286:286	251:251:251:251	186:186:186:190	292:292:292:292	208:208:208:210	288:288:290:296	miss:miss:miss:miss	290:290:296:296	350:356:356:356	206:209:209:212
413,	246:246:246:246	217:217:220:226	259:259:265:275	188:188:188:190	209:209:215:215	187:187:190:190	238:238:238:246	205:208:208:208	240:252:256:258	240:242:246:246	239:243:253:265	332:332:332:332	284:286:286:288	245:245:251:251	186:186:188:190	292:292:296:298	208:208:208:210	288:288:288:288	miss:miss:miss:miss	293:293:296:296	353:353:356:356	209:209:209:212
414,	244:246:246:248	217:217:220:220	265:265:265:271	188:188:188:190	215:215:215:218	187:187:196:199	222:228:238:238	205:208:208:208	244:252:252:264	234:234:240:240	247:247:257:257	332:332:338:338	286:286:286:292	249:249:251:253	186:186:188:190	292:292:292:292	208:208:208:208	288:288:288:288	263:263:266:266	293:293:296:296	350:350:356:356	206:209:209:212
415,	246:246:246:246	211:211:217:217	259:265:269:271	188:188:190:190	215:215:215:227	187:187:187:196	222:228:238:238	205:208:208:208	240:244:256:266	232:238:240:248	243:243:243:257	332:332:338:338	284:284:284:288	245:251:251:251	186:186:186:186	292:292:294:296	208:208:208:208	288:288:296:300	263:263:266:281	290:296:296:296	317:353:356:356	209:209:212:212
416,	246:248:250:262	211:211:217:217	257:259:259:267	188:188:190:190	215:218:218:218	187:187:190:199	228:228:238:238	208:208:208:208	244:244:250:264	240:240:240:240	239:245:253:255	332:332:334:338	284:284:286:286	251:251:251:257	186:186:186:186	292:292:292:292	208:208:210:210	miss:miss:miss:miss	263:263:266:266	290:296:296:296	347:353:356:356	206:206:209:212
417,	242:242:250:250	211:211:217:217	257:259:259:275	188:188:188:190	212:215:215:215	187:187:187:187	228:238:238:238	205:205:205:208	240:240:242:248	240:240:240:240	243:243:253:253	332:338:338:338	284:284:284:286	247:249:249:251	186:186:186:190	292:292:292:292	208:208:208:208	274:288:288:294	263:263:263:263	290:293:296:296	353:353:353:356	miss:miss:miss:miss
418,	240:246:248:250	217:217:217:217	257:259:259:269	188:190:190:190	209:212:215:218	180:187:190:190	222:230:234:238	208:208:208:208	250:252:256:260	240:240:240:240	245:255:261:267	328:332:332:332	284:286:286:286	245:245:251:251	186:186:188:190	miss:miss:miss:miss	208:208:210:210	288:288:290:296	miss:miss:miss:miss	296:296:296:299	350:356:356:356	miss:miss:miss:miss
419,	246:246:246:262	217:217:217:220	259:263:265:275	188:188:188:188	215:215:215:215	187:187:187:187	238:238:238:238	208:208:208:208	244:254:262:264	240:240:246:246	247:247:261:263	332:332:332:332	284:284:286:292	249:251:251:253	184:186:190:192	miss:miss:miss:miss	208:208:208:210	290:294:294:294	263:263:266:266	290:290:290:296	353:356:356:359	miss:miss:miss:miss
420,	246:246:248:250	217:217:217:217	257:259:263:271	188:190:190:190	209:215:218:218	178:187:199:199	238:238:246:246	205:208:208:208	244:250:252:258	240:240:242:242	247:247:255:261	332:332:334:342	286:286:286:286	249:251:251:257	186:186:186:190	296:296:296:296	208:208:210:210	274:288:288:288	263:263:266:269	290:293:296:296	353:356:356:356	miss:miss:miss:miss
421,	246:250:250:250	211:217:217:217	257:259:259:271	188:188:188:190	215:215:218:218	187:187:187:187	216:238:238:246	205:205:205:208	244:252:252:260	miss:miss:miss:miss	245:245:253:253	336:336:336:336	284:286:290:292	245:249:251:251	186:186:186:186	292:292:292:292	208:208:208:210	290:290:296:296	miss:miss:miss:miss	290:296:302:302	353:353:353:353	miss:miss:miss:miss
422,	246:246:246:248	211:217:217:220	269:269:271:271	188:188:190:190	209:212:215:218	187:190:199:199	230:238:238:238	208:208:208:208	240:242:244:260	234:244:244:244	247:247:253:267	332:334:338:344	284:284:286:286	249:249:251:251	186:186:188:188	292:292:294:294	208:208:210:210	274:288:288:288	263:263:266:272	290:296:296:299	350:353:353:356	209:209:209:212
423,	246:246:246:246	211:217:217:220	257:263:263:271	188:188:188:190	215:215:218:227	187:187:190:199	228:228:238:238	208:208:208:208	240:244:250:268	240:240:242:248	245:247:261:265	332:332:336:338	284:286:286:288	247:249:251:253	188:190:190:204	296:296:298:298	208:208:208:210	288:288:288:288	263:263:266:266	290:290:296:296	344:344:353:356	209:209:209:209
424,	242:246:248:252	211:211:217:217	259:259:271:271	188:188:188:190	miss:miss:miss:miss	187:190:190:199	222:228:238:238	205:208:208:208	240:244:244:258	240:240:242:242	239:239:257:261	336:338:338:344	284:286:286:286	251:251:255:255	186:186:186:190	292:292:296:296	208:208:210:214	288:288:288:288	266:266:272:272	290:290:290:293	356:356:356:356	209:209:212:218
425,	246:246:246:248	211:217:217:217	257:257:265:265	188:188:188:190	215:215:218:227	180:187:187:190	216:228:228:238	205:208:208:208	240:244:256:268	240:240:240:240	243:247:253:261	332:334:334:338	284:284:286:286	245:249:249:263	188:188:190:190	298:298:298:298	208:208:208:208	274:288:288:288	272:272:272:272	290:290:290:296	332:350:353:356	200:200:209:212
426,	246:248:250:250	211:217:217:220	259:259:265:269	188:188:188:190	212:215:218:218	187:187:187:199	238:238:238:246	205:205:208:208	244:244:262:264	240:244:248:256	245:245:253:253	328:332:332:332	284:284:286:286	249:249:249:249	186:186:186:188	292:292:292:292	208:208:208:210	288:288:288:288	263:266:266:266	290:290:290:296	332:332:353:356	209:209:215:215
427,	246:246:246:246	217:217:217:226	257:259:265:269	188:188:188:190	209:215:215:215	187:187:187:196	234:238:238:238	205:208:208:208	248:250:250:252	234:252:252:252	247:247:253:253	332:332:332:332	284:286:286:290	245:251:253:253	182:186:186:186	292:292:292:298	208:208:208:210	288:288:296:296	263:266:269:275	293:296:296:296	317:353:353:353	206:209:212:212
428,	246:248:248:262	211:217:217:220	263:267:267:275	188:188:190:190	218:218:221:227	187:187:190:199	228:228:234:234	205:208:208:208	240:240:244:260	234:234:240:240	247:247:253:253	332:332:332:332	286:286:286:290	245:249:249:249	186:186:188:188	292:292:294:298	208:208:208:210	294:294:294:294	272:272:272:272	290:293:293:302	344:356:356:356	209:209:209:212
429,	244:246:248:250	217:217:217:220	263:265:267:271	188:188:190:190	miss:miss:miss:miss	180:187:187:190	216:216:238:246	205:205:208:208	244:244:244:250	240:240:242:242	243:243:247:253	332:332:332:338	284:284:286:286	245:249:249:251	186:186:186:190	292:292:296:298	208:210:210:216	274:284:284:288	266:266:269:272	296:296:296:302	332:344:353:356	209:209:212:215
430,	246:250:250:262	217:217:220:226	257:257:259:265	miss:miss:miss:miss	miss:miss:miss:miss	187:187:187:196	238:238:238:238	208:208:208:211	240:244:244:262	234:234:240:240	243:253:259:261	332:334:334:342	284:284:288:288	249:249:251:251	186:190:190:194	292:292:294:296	208:208:210:214	272:288:290:290	266:266:275:278	296:296:296:296	350:353:353:353	209:212:212:212
431,	246:246:246:248	217:220:220:226	257:259:259:271	188:188:188:190	218:218:218:218	187:187:187:190	miss:miss:miss:miss	205:208:208:208	242:250:258:264	240:240:240:240	253:253:253:253	328:332:332:338	284:284:286:286	251:251:251:259	186:188:190:192	292:294:294:294	208:208:210:210	290:290:300:300	248:263:266:272	290:290:290:293	341:353:353:353	209:209:209:209
432,	246:246:248:250	211:217:217:217	259:259:265:271	188:188:190:190	215:215:218:218	187:187:187:199	228:228:228:238	205:205:205:208	244:246:250:264	240:240:244:254	239:239:245:245	332:332:332:332	284:284:286:286	245:245:249:253	186:186:186:196	296:296:296:296	208:208:208:208	274:288:288:290	248:263:266:275	290:296:296:296	344:353:353:356	206:209:209:209
pop 16
433,	244:246:246:250	211:217:217:220	259:259:267:271	188:188:188:190	206:215:215:218	187:187:187:190	224:238:238:238	205:208:208:208	244:244:246:256	238:238:240:240	245:245:261:261	336:336:336:336	284:286:288:290	251:251:251:253	186:186:186:186	292:292:292:292	208:208:212:212	miss:miss:miss:miss	248:248:248:263	290:290:296:302	332:353:353:356	miss:miss:miss:miss
434,	246:246:246:246	211:211:217:220	257:257:259:259	190:190:190:190	209:215:218:218	187:187:196:199	226:238:238:238	205:205:205:208	240:244:244:260	234:240:240:240	245:245:257:261	336:336:336:336	284:284:284:286	249:251:251:261	186:188:192:204	292:292:296:296	208:208:210:210	miss:miss:miss:miss	263:266:272:272	290:296:296:296	317:356:356:356	miss:miss:miss:miss
435,	246:246:248:252	217:217:217:220	259:265:269:271	190:190:190:190	miss:miss:miss:miss	187:187:187:187	238:238:238:238	205:208:208:208	244:254:256:260	244:244:244:244	253:253:261:261	332:332:336:336	286:286:288:290	239:245:249:249	186:186:186:188	292:292:296:296	208:208:208:210	288:288:288:288	266:266:272:272	290:290:296:296	347:353:353:356	miss:miss:miss:miss
436,	miss:miss:miss:miss	211:217:220:220	259:259:265:271	188:190:190:190	215:215:215:221	187:187:187:190	234:238:238:238	208:208:208:208	240:244:264:270	242:242:244:244	245:245:253:253	338:338:338:338	284:286:286:290	249:251:251:253	186:186:188:190	292:292:296:296	208:208:208:208	miss:miss:miss:miss	260:260:263:269	290:293:296:296	344:353:353:356	209:209:212:212
437,	246:246:250:250	217:217:217:217	257:259:259:265	188:188:188:190	206:209:215:224	187:190:199:199	222:228:234:236	205:205:208:208	254:254:256:266	236:236:240:240	239:239:239:239	332:332:336:338	284:284:288:290	239:249:251:251	186:186:186:188	292:296:304:304	208:210:210:216	278:278:288:290	248:260:260:260	293:296:296:296	353:353:356:356	209:209:218:218
438,	244:246:246:250	211:217:217:220	259:259:267:271	188:188:188:190	206:215:215:218	187:187:187:190	224:238:238:238	205:208:208:208	244:244:246:256	238:238:240:240	245:245:261:261	336:336:336:336	284:286:288:290	251:251:251:251	186:186:186:186	292:292:292:292	208:208:208:208	miss:miss:miss:miss	248:248:248:263	293:296:296:296	332:353:353:356	209:209:212:212
439,	246:246:246:250	211:217:217:217	259:265:265:271	188:188:188:188	215:215:215:218	187:187:190:190	224:228:238:238	205:205:208:208	244:244:256:264	234:234:234:240	247:247:249:255	332:332:336:338	286:286:286:286	239:249:249:251	186:186:190:190	292:292:296:296	208:208:208:216	288:288:288:288	248:248:257:269	293:296:296:296	347:353:353:356	212:212:212:212
440,	244:246:246:250	211:217:217:220	259:259:267:271	188:188:188:190	206:215:218:218	187:187:187:190	238:238:238:238	205:208:208:208	244:244:246:256	238:238:240:240	245:245:261:261	336:336:336:336	284:286:288:290	251:251:251:253	186:186:186:186	292:292:292:292	208:208:208:208	288:288:288:290	248:248:248:263	290:290:296:302	332:353:353:356	209:209:212:212
441,	246:246:246:250	211:217:217:217	259:265:265:271	188:188:188:188	215:215:218:218	187:190:190:190	224:228:238:238	205:208:208:208	244:244:256:264	234:234:234:240	247:247:249:255	332:332:336:338	286:286:286:286	239:249:251:251	186:186:190:190	292:292:296:296	miss:miss:miss:miss	miss:miss:miss:miss	248:248:257:269	293:296:296:296	347:353:353:356	212:212:212:212
442,	246:246:248:248	211:217:217:217	259:259:265:271	188:188:188:188	215:215:221:221	187:187:187:190	220:220:238:238	205:208:208:208	246:246:250:258	240:242:242:252	245:259:261:261	332:332:332:332	286:286:288:288	249:251:251:251	184:186:188:190	292:292:304:304	208:208:208:210	274:288:288:294	263:263:272:272	290:296:296:296	332:344:353:356	206:206:209:209
443,	246:246:246:246	217:217:217:220	257:257:259:259	188:188:190:190	215:215:215:218	187:187:187:190	238:238:238:238	205:208:208:208	250:250:254:256	234:234:240:242	239:245:259:261	328:328:332:336	284:286:286:292	249:249:249:251	186:186:186:188	292:292:294:294	208:208:210:210	288:288:288:294	266:266:272:281	290:296:296:296	353:353:356:359	206:206:209:212
444,	246:246:246:250	211:217:217:217	259:265:265:271	188:188:188:188	215:215:215:218	187:187:190:190	224:228:238:238	205:208:208:208	244:244:256:264	234:234:234:240	247:247:249:255	332:332:336:338	286:286:286:286	239:249:249:251	186:186:190:190	292:292:296:296	208:208:208:208	288:288:288:288	248:248:257:269	293:296:296:296	347:353:353:356	212:212:212:212
445,	miss:miss:miss:miss	217:217:217:217	259:259:271:273	188:188:188:190	209:209:215:218	187:187:187:190	238:238:238:238	205:205:208:208	240:254:262:268	236:236:240:240	255:255:255:255	332:332:332:332	284:284:290:290	245:251:255:263	186:188:188:190	296:296:296:296	208:208:208:208	272:288:288:294	260:260:260:266	290:290:290:293	353:356:356:356	212:212:218:218
446,	244:246:246:250	211:217:217:220	259:259:267:271	188:188:188:190	miss:miss:miss:miss	187:187:187:190	224:238:238:238	205:208:208:208	244:244:246:256	238:238:240:240	245:245:261:261	336:336:336:336	284:286:288:290	251:251:251:251	186:186:186:186	292:292:292:292	208:208:208:208	288:288:288:290	248:248:248:263	290:290:296:302	332:353:353:356	209:209:212:212
447,	248:248:248:248	217:217:217:217	259:259:259:265	188:188:188:188	215:215:215:215	187:187:187:199	238:238:238:238	205:208:208:208	240:246:250:250	240:240:242:242	239:239:245:245	328:332:332:336	284:286:286:292	249:249:249:249	186:186:186:188	miss:miss:miss:miss	210:210:210:218	288:288:288:294	263:263:269:272	290:290:296:296	317:350:359:359	209:209:212:212
448,	242:246:246:262	211:217:220:220	259:259:265:271	188:188:188:190	209:215:221:221	187:187:193:193	238:238:238:238	208:208:208:208	244:252:256:256	234:234:240:240	255:255:261:261	332:332:332:338	284:286:286:286	239:251:251:251	186:186:186:192	298:298:298:298	208:208:208:208	274:274:288:288	266:272:272:283	290:296:299:299	317:317:356:356	206:206:206:206
449,	246:246:246:250	211:217:217:217	259:265:265:271	188:188:188:188	miss:miss:miss:miss	187:190:190:190	226:228:238:238	205:208:208:208	244:244:244:256	234:234:234:240	247:247:249:255	332:332:336:338	286:286:286:286	239:249:249:251	186:186:190:190	292:292:296:296	208:208:208:216	288:288:288:288	248:248:257:269	293:296:296:296	347:353:353:356	212:212:212:212
450,	246:246:246:246	211:217:217:226	257:259:259:259	188:188:188:188	209:215:215:218	187:190:190:190	228:238:238:238	208:208:208:208	244:244:256:260	234:242:242:242	243:243:247:261	332:332:336:336	284:284:284:286	249:251:251:253	186:186:186:188	292:292:304:304	208:208:210:210	miss:miss:miss:miss	248:260:263:266	293:296:296:296	317:356:356:356	206:206:209:218
451,	242:242:248:254	211:217:217:238	259:259:265:271	188:188:188:190	215:215:215:218	187:187:187:190	234:234:238:238	205:208:208:208	244:244:248:264	242:242:242:244	245:245:253:253	328:328:338:338	286:286:286:290	251:251:251:251	186:186:186:190	296:296:296:296	208:208:208:208	274:288:294:294	266:266:269:269	290:290:293:296	344:344:350:356	209:212:212:212
452,	246:246:246:250	217:217:217:217	259:259:259:271	188:188:188:190	215:215:215:218	187:187:187:199	222:228:238:238	205:208:208:208	240:244:244:264	240:240:242:244	257:257:261:261	330:330:332:332	284:286:286:288	245:249:251:251	186:186:186:194	292:292:292:292	208:208:208:208	276:288:288:288	263:263:266:266	290:293:296:296	356:356:356:356	206:209:209:212
453,	miss:miss:miss:miss	211:217:220:220	259:259:265:271	188:188:190:190	215:215:215:221	187:187:187:190	234:238:238:238	205:208:208:208	miss:miss:miss:miss	242:242:244:244	245:245:253:253	miss:miss:miss:miss	284:286:286:290	249:251:251:253	186:186:188:190	292:296:296:296	208:208:208:208	288:288:294:294	260:260:263:269	miss:miss:miss:miss	344:353:353:356	209:209:212:212
454,	246:246:246:250	217:217:217:217	257:259:269:271	188:188:190:190	miss:miss:miss:miss	187:187:190:199	238:238:238:246	208:208:208:208	244:250:252:256	242:242:244:244	247:247:253:253	330:330:332:332	284:284:286:286	249:249:249:249	186:186:186:186	294:296:296:296	208:208:210:216	288:294:296:298	257:266:266:266	290:293:296:296	miss:miss:miss:miss	209:212:212:212
455,	244:246:246:250	211:217:217:220	259:259:267:271	188:188:188:190	miss:miss:miss:miss	187:187:187:190	224:238:238:238	205:208:208:208	244:244:246:256	238:238:240:240	245:245:245:261	miss:miss:miss:miss	284:286:288:290	251:251:251:253	186:186:186:186	292:292:292:292	208:208:208:208	288:288:288:290	248:248:248:263	290:290:296:302	332:353:353:356	209:209:212:212
456,	246:248:254:262	217:217:220:220	259:263:271:271	188:188:188:190	209:215:215:215	187:187:187:199	238:238:238:238	208:208:208:211	240:258:258:260	240:240:240:248	245:245:247:253	334:334:334:334	284:284:286:292	251:251:251:251	186:186:188:190	miss:miss:miss:miss	208:208:210:216	288:288:288:288	248:263:263:266	290:296:296:296	350:353:356:356	206:206:212:218
457,	246:248:254:262	217:217:220:220	259:263:271:271	188:188:188:190	miss:miss:miss:miss	miss:miss:miss:miss	miss:miss:miss:miss	208:208:208:211	240:258:258:260	240:240:240:248	245:245:247:253	334:334:334:334	284:284:286:292	251:251:251:251	186:186:188:190	miss:miss:miss:miss	208:208:210:216	288:288:288:288	248:263:263:266	290:296:296:296	350:353:353:356	206:206:212:218
458,	244:246:246:250	211:217:217:220	259:259:267:271	188:188:188:190	miss:miss:miss:miss	187:187:190:190	224:238:238:238	205:208:208:208	244:244:246:256	238:238:240:240	245:245:261:261	338:338:338:338	284:286:288:290	251:251:251:253	186:186:186:186	292:292:292:292	208:208:208:208	288:288:288:290	248:248:248:263	290:290:296:302	332:353:353:356	209:209:212:212
459,	242:242:244:266	211:217:220:220	259:259:265:271	188:190:190:190	215:215:215:221	187:187:187:190	234:238:238:238	205:208:208:208	240:244:264:270	242:242:244:244	245:245:253:253	miss:miss:miss:miss	284:286:286:290	249:251:251:253	186:186:188:190	292:296:296:296	208:208:208:208	288:288:294:294	260:260:263:269	290:293:296:296	344:353:353:356	209:209:212:212
460,	miss:miss:miss:miss	211:217:217:217	257:265:269:275	188:188:188:190	209:209:218:218	187:187:187:187	234:234:238:238	208:208:208:208	240:250:254:264	240:242:244:246	239:239:253:253	334:334:334:334	284:284:286:288	249:251:255:259	184:186:186:186	292:292:294:304	208:210:212:212	miss:miss:miss:miss	248:266:275:275	290:296:296:296	350:353:356:356	206:209:209:218
461,	miss:miss:miss:miss	211:217:217:217	259:259:265:271	188:188:188:188	215:215:215:221	187:187:187:190	220:220:238:238	205:208:208:208	246:246:250:258	240:242:242:252	245:259:261:261	332:332:332:332	286:286:288:288	249:249:251:251	184:186:188:190	292:292:304:304	208:208:208:210	miss:miss:miss:miss	263:263:272:272	290:296:296:296	332:344:353:356	206:206:209:209
462,	miss:miss:miss:miss	211:217:217:217	257:259:259:259	188:188:188:190	miss:miss:miss:miss	187:187:190:190	238:238:238:238	205:208:208:211	244:262:262:264	240:240:244:244	239:243:247:253	332:338:338:344	284:284:284:286	245:249:251:251	186:186:186:190	292:292:304:304	208:208:208:210	miss:miss:miss:miss	miss:miss:miss:miss	290:296:296:296	350:353:353:356	209:212:212:218
463,	miss:miss:miss:miss	211:217:217:220	259:259:259:271	190:190:190:190	215:215:218:218	187:187:187:190	238:238:238:246	205:205:208:208	244:244:244:250	240:240:244:244	239:247:253:259	332:332:338:338	284:284:286:288	miss:miss:miss:miss	186:186:188:190	294:294:294:294	208:208:210:210	miss:miss:miss:miss	257:257:266:266	296:296:296:296	317:317:317:350	206:209:212:212
464,	246:246:246:246	211:217:217:217	265:271:271:271	188:188:190:190	209:209:218:218	187:187:187:196	238:238:238:246	208:208:208:208	240:244:250:250	234:240:240:240	261:261:265:265	330:332:340:340	284:286:286:286	249:249:249:249	186:186:188:190	miss:miss:miss:miss	208:208:210:210	282:282:290:298	266:266:266:275	290:290:296:296	341:353:353:356	209:209:209:212
pop 17
465,	246:246:246:252	217:217:217:220	259:259:265:271	188:188:188:188	209:215:215:215	187:190:190:199	228:238:238:238	205:205:208:208	244:244:244:262	234:236:238:240	247:247:249:249	334:336:338:338	286:286:286:286	241:249:251:251	186:186:190:190	292:292:296:296	208:208:208:216	288:288:292:300	248:263:263:269	290:296:296:296	347:353:353:356	212:212:212:212
466,	246:246:246:252	211:217:217:217	259:265:265:271	188:188:188:188	215:215:215:218	187:190:190:190	226:230:238:238	205:208:208:208	244:244:256:266	234:236:238:240	247:249:255:257	334:334:336:338	286:286:286:286	241:249:249:251	186:186:190:190	292:292:296:296	208:208:208:216	288:288:290:298	248:248:257:269	293:296:296:296	332:353:353:356	212:212:212:212
467,	246:246:246:252	211:217:217:217	259:265:265:271	188:188:188:188	215:215:215:218	187:190:190:190	226:230:238:238	205:208:208:208	244:244:256:266	234:236:238:240	247:249:255:257	334:334:336:338	286:286:286:286	241:249:249:251	186:186:190:190	292:292:296:296	208:208:208:216	288:288:290:298	248:248:257:269	293:296:296:296	347:353:353:356	212:212:212:212
468,	246:246:248:252	217:217:217:220	259:259:259:271	188:188:188:190	209:209:215:215	187:190:199:199	230:234:238:238	205:208:208:208	244:244:244:262	240:242:244:244	243:243:261:263	334:336:338:338	286:286:288:288	249:249:249:251	186:186:186:186	296:296:296:296	208:208:208:210	288:288:288:294	263:263:263:263	290:293:296:296	miss:miss:miss:miss	206:209:212:212
469,	246:246:246:252	217:217:217:220	259:259:265:271	188:188:188:188	209:209:215:215	187:190:190:199	230:238:238:238	205:205:208:208	244:244:244:262	234:236:238:240	247:247:249:249	334:336:338:338	284:286:286:286	241:249:249:251	186:186:190:190	292:292:296:296	208:208:208:216	288:288:290:294	263:263:263:269	290:296:296:296	356:356:356:356	212:212:212:212
470,	246:246:246:252	211:217:217:217	259:265:265:271	188:188:188:188	215:215:215:218	187:190:190:190	226:230:238:238	205:208:208:208	244:244:256:266	234:236:238:240	247:249:255:257	332:332:336:338	284:286:286:286	245:249:251:257	186:186:190:190	292:292:296:296	208:208:208:216	288:288:290:298	248:248:257:269	293:296:296:296	347:353:353:356	212:212:212:212
471,	244:246:246:252	211:217:217:220	259:259:267:271	188:188:188:190	206:215:215:218	187:187:187:190	226:238:238:238	205:208:208:208	miss:miss:miss:miss	238:240:240:240	245:245:261:263	330:336:336:336	284:286:288:290	249:251:251:253	184:186:186:186	292:292:292:292	208:208:208:208	288:288:288:290	248:248:248:263	290:290:296:302	347:353:353:356	209:209:212:212
472,	246:246:246:252	211:217:217:217	259:265:265:271	188:188:188:188	215:215:218:218	187:190:190:190	226:230:238:238	205:208:208:208	244:244:256:266	234:236:238:240	247:249:255:257	332:332:336:338	286:286:286:286	239:249:249:251	186:186:190:190	292:292:296:296	208:208:208:216	288:288:290:298	248:248:257:269	293:296:296:296	347:356:356:356	212:212:212:212
473,	246:246:246:252	211:217:217:217	259:265:265:271	miss:miss:miss:miss	215:215:215:218	187:190:190:190	226:228:238:238	205:208:208:208	244:244:256:266	234:236:238:240	247:249:255:257	334:334:336:338	286:286:286:286	241:249:257:265	186:186:190:190	292:292:296:296	208:208:208:216	288:288:290:298	248:248:257:269	293:296:296:296	347:353:353:356	212:212:212:212
474,	244:246:246:252	211:217:217:220	259:259:267:271	188:188:188:190	206:215:215:218	187:187:187:190	226:238:238:238	205:208:208:208	244:244:246:256	236:238:240:240	245:245:261:263	330:336:336:336	284:286:288:290	249:251:251:253	186:186:186:186	292:292:292:292	208:208:208:208	288:288:288:290	248:248:248:263	290:290:296:302	350:350:353:356	209:209:212:212
475,	246:246:246:252	211:217:217:217	259:265:265:271	188:188:188:188	215:215:215:218	187:190:190:190	226:230:238:238	205:208:208:208	244:244:256:266	234:236:238:240	247:249:255:257	334:334:336:338	286:286:286:286	241:249:251:259	186:186:190:190	292:292:296:296	208:208:208:216	288:288:290:298	248:248:257:269	293:293:296:296	317:350:353:356	212:212:212:212
476,	246:246:246:252	211:217:217:217	259:265:265:271	188:188:188:188	215:215:218:218	187:190:190:190	226:260:238:238	205:208:208:208	244:244:256:266	234:236:238:240	247:249:255:257	332:332:336:338	284:286:286:286	241:249:249:251	186:186:190:190	292:292:296:296	208:208:208:216	288:288:290:298	248:248:257:269	293:293:296:296	350:350:353:353	212:212:212:212
477,	246:246:246:252	211:217:217:217	259:265:265:271	188:188:188:188	215:215:215:218	187:190:190:190	226:230:238:238	205:208:208:208	244:244:256:266	234:236:238:240	247:249:255:257	332:332:336:338	284:286:286:286	241:249:249:251	186:186:190:190	292:292:296:296	208:208:208:216	288:288:290:298	248:248:257:269	293:296:296:296	317:317:332:353	212:212:212:212
478,	246:246:246:252	211:217:217:217	259:265:265:271	188:188:188:188	215:215:218:218	187:190:190:190	226:228:238:238	205:208:208:208	miss:miss:miss:miss	234:236:238:240	247:249:255:257	332:332:336:338	288:288:288:288	241:249:249:251	186:186:190:190	292:292:296:296	208:208:208:216	288:288:290:298	248:248:257:269	293:296:296:296	344:344:356:359	212:212:212:212
479,	246:246:246:252	211:217:217:217	259:265:265:271	188:188:188:188	215:215:215:218	187:190:190:190	226:230:238:238	205:208:208:208	244:244:256:266	234:236:238:240	247:249:255:257	332:332:336:338	286:286:286:286	241:249:249:251	186:186:190:190	292:292:296:296	208:208:208:216	288:288:290:298	248:248:257:269	293:296:296:296	miss:miss:miss:miss	212:212:212:212
480,	246:246:246:248	217:217:217:220	259:259:265:265	188:188:188:190	215:215:215:215	190:190:199:199	234:238:238:238	205:205:208:208	244:244:244:266	234:236:238:240	249:255:257:257	332:332:336:338	286:286:286:286	241:241:249:249	186:186:190:190	292:296:296:296	208:208:208:216	288:288:288:290	248:263:263:269	290:296:296:296	317:353:353:356	206:209:212:212
481,	246:246:246:252	211:217:217:217	259:265:265:271	188:188:188:188	215:215:215:218	187:190:190:190	226:230:238:238	205:208:208:208	244:244:256:266	234:236:238:240	247:249:255:257	334:334:336:338	286:286:286:286	241:249:249:251	186:186:190:190	292:292:296:296	208:208:208:216	288:288:290:298	248:248:257:269	293:296:296:296	317:353:353:356	212:212:212:212
482,	244:246:246:252	211:217:217:220	259:259:267:271	188:188:188:190	206:215:215:218	187:187:187:190	226:238:238:238	205:208:208:208	244:244:246:256	238:240:240:240	245:245:261:263	336:336:336:336	284:286:288:290	249:251:251:253	186:186:186:186	292:292:292:292	208:208:208:210	288:288:288:290	248:248:248:263	290:290:296:302	350:353:353:356	209:209:212:212
483,	246:246:246:252	211:217:217:217	259:265:265:271	188:188:188:188	215:215:215:218	187:190:190:190	226:230:238:238	205:208:208:208	244:244:256:266	234:236:238:240	247:249:255:257	334:334:336:338	286:286:286:286	241:249:249:251	186:186:190:190	292:292:296:296	208:208:208:216	288:288:290:298	248:248:257:269	293:293:296:296	350:353:356:359	212:212:212:212
484,	246:246:246:252	211:217:217:217	259:265:265:271	188:188:188:188	215:215:218:218	187:187:190:190	226:260:238:238	205:208:208:208	244:244:256:266	234:236:238:240	247:249:255:257	332:332:336:338	286:286:286:286	241:249:249:251	186:186:190:190	292:292:296:296	208:208:208:216	288:288:290:298	248:248:257:269	293:293:296:296	341:350:356:356	212:212:212:212
485,	246:246:252:252	217:217:217:217	259:259:265:271	188:188:188:190	209:215:218:221	187:190:196:196	238:238:238:238	205:205:208:208	244:244:250:258	240:242:242:248	247:247:247:247	330:332:334:336	284:286:286:286	249:249:249:251	184:186:188:192	292:292:294:294	208:208:210:216	288:294:296:300	266:266:269:269	290:296:296:296	317:317:344:356	206:212:212:212
486,	246:246:246:252	211:217:217:217	259:265:265:271	188:188:188:188	215:215:218:218	miss:miss:miss:miss	226:228:238:238	205:208:208:208	244:244:256:266	234:236:238:240	247:249:255:257	332:332:336:338	288:288:288:288	241:249:249:251	186:186:190:190	292:292:296:296	208:208:208:216	288:288:290:298	248:248:257:269	293:296:296:296	317:317:353:359	212:212:212:212
487,	246:246:246:252	211:217:217:217	259:265:265:271	188:188:188:188	215:215:215:218	187:190:190:190	226:230:238:238	205:208:208:208	244:244:256:266	234:236:238:240	247:249:255:257	332:332:336:338	288:288:288:288	241:249:249:251	186:186:190:190	292:292:296:296	208:208:208:216	288:288:290:298	248:248:257:269	293:296:296:296	341:356:356:356	212:212:212:212
488,	246:246:246:252	211:217:217:217	259:265:265:271	188:188:188:188	215:215:215:218	187:190:190:190	226:230:238:238	205:208:208:208	244:244:256:266	234:236:238:240	247:247:249:257	332:332:336:338	288:288:288:288	241:249:251:255	186:186:190:190	292:292:296:296	208:208:208:216	288:288:290:298	248:248:257:269	293:296:296:296	miss:miss:miss:miss	212:212:212:215
489,	246:250:254:262	217:217:220:220	259:263:271:271	188:188:188:190	209:215:215:215	187:187:187:199	226:238:238:238	208:208:208:211	240:256:258:260	238:240:242:248	245:247:251:253	334:334:334:336	288:288:288:288	249:251:251:251	186:186:188:190	miss:miss:miss:miss	208:208:210:216	288:288:288:288	248:263:263:266	293:296:296:296	353:353:353:356	206:206:212:218
490,	246:246:246:252	211:217:217:217	259:265:265:271	188:188:188:188	215:215:215:218	187:190:190:190	226:230:238:238	205:208:208:208	244:244:256:266	234:236:238:240	247:249:255:257	334:334:336:338	288:288:288:288	241:249:249:251	186:186:190:190	292:292:296:296	208:208:208:216	288:288:290:298	248:248:257:269	290:290:296:296	347:353:353:356	212:212:212:212
491,	244:246:246:252	211:217:217:220	259:259:267:271	188:188:188:190	206:215:215:218	187:187:187:190	226:238:238:238	205:208:208:208	244:244:246:256	236:238:240:240	245:245:261:263	330:336:336:336	288:288:288:288	249:251:251:253	186:186:186:186	292:292:292:292	208:208:208:208	288:288:288:290	248:248:257:263	290:290:296:302	347:353:353:356	209:209:212:212
